# Supplementary material for: The Transcriptome of Leishmania major Developmental Stages in Their Natural Sand Fly Vector
Source: PubMed Central journal article supplement (PMC5380837; doi:10.1128/mbio.00029-17), 2017-04-04
Supplement: mbo002173254s1.pdf [file mbo002173254s1.pdf]

# Supplemental file: sandfly co-expression cluster analysis

V. Keith Hughitt

12 December, 2016

## Contents

|                                           |    |
|-------------------------------------------|----|
| Overview . . . . .                        | 1  |
| Supplemental Figures and Tables . . . . . | 1  |
| Data Preparation . . . . .                | 44 |
| Reproducing this analysis . . . . .       | 45 |
| References . . . . .                      | 46 |
| System Information . . . . .              | 47 |

## Overview

This document contains all of the code used for the co-expression cluster analysis portion of the manuscript, including all relevant figures and tables from the manuscript.

The analyses in this document start with raw RNA-Seq count tables. For information on how the original RNA-Seq samples were processed into count tables, see the section title “Data Preparation” below.

In order to ensure that all results described here can be easily reproduced, this document and all figures and tables herein have been automatically generated. For instructions on how to re-run these analyses, see the section titled “Reproducing this analysis”.

## Supplemental Figures and Tables

```
library('knitcitations')

# hide information about knit progress from output
opts_knit$set(
  progress=FALSE,
  verbose=FALSE,
  message=FALSE,
  warning=FALSE,
  error=FALSE
)

# If rmarkdown.pandoc.to not specified (for example, when knitting
# piece-by-piece in Vim-R), have it default to 'latex' output.
if (is.null(opts_knit$get("rmarkdown.pandoc.to"))) {
  opts_knit$set(rmarkdown.pandoc.to='latex')
}

# For images containing unicode text, we will use cairo for PDF output
opts_chunk$set(dev='cairo_pdf',
  dev.args=list(cairo_pdf=list(family="DejaVu Sans")))

# Other options
```

```

options(digits=4)
options(stringsAsFactors=FALSE)
options(knitr.duplicate.label='allow')
options(citation_format='pandoc')

# Clean up any existing variables
rm(list=ls())

# Make sure results are reproducible
set.seed(1)

# Load required libraries
library('Biobase')
library('biomaRt')
library('doParallel')
library('flashClust')
library('foreach')
library('ggplot2')
library('goseq')
library('GO.db')
library('gplots')
library('limma')
library('Matrix')
library('dplyr')
library('readr')
library('tools')
library('rtracklayer')
library('preprocessCore')
library('reshape2')
library('RColorBrewer')
library('RCurl')
library('hpgltools')
library('gridExtra')
library('WGCNA')

# Enable WGCNA multithreading
allowWGCNAThreads()
enableWGCNAThreads()

# Load helper functions
# https://github.com/elsayed-lab/manuscript-shared-rnaseq
source('../R/annotations.R')
source('../R/count_tables.R')
source('../R/enrichment_analysis.R')
source('../R/filtering.R')
source('../R/plots.R')
source('../R/wgcna.R')

# Side-by-side plots (PDF)
combined_plot_width = '3.5in'

samples <- tbl_df(read.csv('samples.csv')) %>%
  filter(parasite == 'L. major Ryan' & condition != "Culture metac")
  #filter(parasite == 'L. major Ryan')

```

```

# fix repeat column name; repeat is conserved word in R and using as column
# name causes problems with dplyr; rename to replicate
colnames(samples)[6] <- 'replicate'

# fix condition names (spaces aren't allowed in makeContrasts)
samples$condition <- gsub(' ', '_', samples$condition)

# input directory
parts <- unlist(strsplit(getwd(), '/'))
input_dir <- do.call(file.path, as.list(c(parts[1:length(parts) - 1], 'input')))

# DE comparisons
condition_pairs <- t(combn(unique(samples$condition), 2))
de_comparisons <- list()
for (i in 1:nrow(condition_pairs)) {
  de_comparisons[[i]] <- as.character(condition_pairs[i,])
}

CONFIG <- list(
  # General
  'pathogen'      = 'L. major',
  'host'          = 'P. duboscqi',
  'target'       = 'pathogen',
  'analysis_name' = 'lmajor-ryan-intracellular-v5.3',
  'use_cache'    = TRUE,
  'verbose'     = FALSE,
  'debug'       = FALSE,
  'save_results' = TRUE,
  'include_tables' = TRUE,

  # Sample variables of interest
  'sample_id'    = 'sample_id',
  'condition'    = 'condition',
  'batch'        = 'replicate',

  # Covariates
  'covariates'   = c('replicate'),

  # Plotting
  'fig_width'    = 1080,
  'fig_height'   = 1080,
  'dpi'          = 96,

  # Input count tables
  'input_count_tables' = file.path("/cbcb/nelsayed-scratch/dillon1/sacks/count_tables",
                                   "20150611_Lmajor60_6961-72_6974_6976-77_6979-80_CDSonly.count"),

  # Gene filtering
  'low_count_threshold' = 1,
  'id_filter_string'    = 'rRNA|5SRRNA|snRNA|snoRNA|SLRNA|TRNA|SRP',
  'type_filter_string'  = 'rRNAencoding|snRNAencoding|snoRNAencoding|tRNAencoding',

  # Normalization / data transformation

```

```

'network_cpm'           = TRUE,
'network_log2'         = TRUE,
'network_voom'         = FALSE,
'network_quantile_normalize' = FALSE,
'network_ebayes_robust' = TRUE,
'network_batch_adjust'  = 'none',

# Annotations
"organism_db"          = "Leishmania.major.Friedlin",
"organism_genome"      = "LmJF",
"orgdb_key"            = "GID",

# Output filepaths
"output_dir"          = file.path(Sys.getenv('SCRATCH'), "coex_networks",
                                   "Lmajor_infecting_Pduboscqi"),

# Network construction
'network_type'        = 'signed',
'similarity_measure'  = 'cor-dist',
'adjmatrix_power'     = 4,
'topological_overlap' = FALSE,

# Module detection
'cut_tree_method'     = 'tree',
'min_module_size'     = 10,
'deep_split'          = FALSE,

# Samples to include
"samples" = samples,
"wgcn_samples" = samples,

# Differential expression contrasts
"de_comparisons" = de_comparisons,
"de_max_pvalue"  = 0.05,
"de_min_log2fc"  = 0,

# Alternate condition values to use for plotting, etc.
"condition_mapping" = data.frame(
  long=unique(samples$condition),
  short=c("AM", 'PP', 'NP', 'MP')
)
)

# set figure dimensions and dpi
opts_chunk$set(fig.width=CONFIG$fig_width/CONFIG$dpi,
               fig.height=CONFIG$fig_height/CONFIG$dpi,
               fig.retina=1,
               dpi=CONFIG$dpi)

# Samples included in this analysis
if (CONFIG$include_tables) {
  kable(CONFIG$samples, caption='RNA-Seq samples.')
}

```

Table 1: RNA-Seq samples.

| sample_id | parasite      | host        | condition      | day | replicate |
|-----------|---------------|-------------|----------------|-----|-----------|
| 6961      | L. major Ryan | M. musculus | Footpad_amast  | NA  | L         |
| 6962      | L. major Ryan | P. duboscqi | Sandfly_day_2  | 2   | L         |
| 6963      | L. major Ryan | P. duboscqi | Sandfly_day_4  | 4   | L         |
| 6964      | L. major Ryan | P. duboscqi | Sandfly_day_15 | 15  | L         |
| 6966      | L. major Ryan | M. musculus | Footpad_amast  | NA  | M         |
| 6967      | L. major Ryan | P. duboscqi | Sandfly_day_2  | 2   | M         |
| 6968      | L. major Ryan | P. duboscqi | Sandfly_day_4  | 4   | M         |
| 6969      | L. major Ryan | P. duboscqi | Sandfly_day_15 | 15  | M         |

```

# Sample metadata
sample_ids <- as.character(CONFIG$samples[[CONFIG$sample_id]])
condition <- factor(CONFIG$samples[[CONFIG$condition]])
batch <- factor(CONFIG$samples[[CONFIG$batch]])

# Covariate dataframe
covariates <- CONFIG$samples %>% select_(.dots=CONFIG$covariates)

# Design matrix; this may be updated later if batch adjustment is enabled
design_condition_only <- model.matrix(~0+condition)
design_including_batch <- model.matrix(~0+condition+batch)

message("Preparing count matrix")

count_table <- read.table(CONFIG$input_count_tables, header=TRUE,
                           row.names=1, check.names=FALSE)

# Filter out samples not needed for this analysis
count_table <- count_table[,sample_ids]

# Drop any rows with NA's (should only occur when comparing counts across
# experiments where different reference GFF's were used)
count_table <- count_table[complete.cases(count_table),]

# Fix gene identifiers
rownames(count_table) <- sub('-1', '', rownames(count_table))

# Genes with alternative transcripts defined (86 total for L. major Friedlin)
alt_txids <- rownames(count_table)[grepl('-[0-9]$', rownames(count_table))]

# Collapse multi-exon gene CDSs, e.g. "LmjF.02.0100-2" "LmjF.02.0100-3"...
multi_exon_counts <- count_table[rownames(count_table) %in% alt_txids,]

# Remove non-primary CDSs from count table
count_table <- count_table[!rownames(count_table) %in% alt_txids,]

# Add counts from other CDSs for gene
multi_exon_genes <- unique(sub('-[2-9]', '', alt_txids))
for (x in multi_exon_genes) {
  counts <- colSums(multi_exon_counts[grepl(x, alt_txids),])
  count_table[x,] = count_table[x,] + counts
}

```

```

}

# Load gene annotations
library(CONFIG$organism_db, character.only=TRUE)
orgdb <- get(CONFIG$organism_db)

# Fix AnnotationDbi namespace mess
assign('select', dplyr::select, envir=.GlobalEnv)
assign('get', base::get, envir=.GlobalEnv)

gene_info <- load_parasite_annotations(orgdb, rownames(count_table),
                                     keytype=CONFIG$orgdb_key)

# Get transcript lengths (sum of all exon lengths for each gene)
txdb <- orgdb@txdbSlot
transcript_lengths <- transcriptLengths(txdb)
transcript_lengths <- transcript_lengths[transcript_lengths$gene_id %in%
                                       gene_info$gene_id,]

gene_info[match(transcript_lengths$gene_id, gene_info$gene_id),
          'transcript_length'] <- transcript_lengths$tx_len
gene_info$transcript_length <- as.numeric(gene_info$transcript_length)

# 2015/06/22 Add placeholder entry for LmjF.28.2965;
# currently excluded from annotation database because of potentially
# problematic annotation (strange exon structure). Contracted TriTrypDB
# regarding the gene.
gene_info <- rbind(gene_info,
                  data.frame(gene_id='LmjF.28.2965',
                             chromosome='LmjF.28',
                             description=NA, strand=NA, type=NA,
                             transcript_length=NA))

# Keep only the feature information remaining genes
gene_info <- gene_info[gene_info$gene_id %in% rownames(count_table),]

# For now, just grab the description for the first transcript
gene_info <- gene_info[!duplicated(gene_info$gene_id),]

# Gene IDs
gene_ids <- rownames(count_table)

# Load GO annotations
go_terms <- load_go_terms(orgdb, rownames(count_table),
                          keytype=CONFIG$orgdb_key)

# Gene / GO term mapping
gene_go_mapping <- as.data.frame(unique(
  go_terms %>% select(get(CONFIG$orgdb_key), GO, ONTOLOGY)
))
colnames(gene_go_mapping) <- c('gene', 'category', 'ontology')

# Mapping from GO ID to term and ontology
go_term_id_mapping <- as.data.frame(unique(go_terms[c('GO', 'TERM', 'ONTOLOGY')]))

```

```

colnames(go_term_id_mapping) <- c("category", "term", "ontology")

# L. major, T. cruzi, etc
gene_kegg_mapping <- load_kegg_mapping(orgdb, rownames(count_table),
                                     keytype=CONFIG$orgdb_key)
kegg_pathways <- load_kegg_pathways(orgdb, rownames(count_table),
                                   keytype=CONFIG$orgdb_key)

# Rename gene/KEGG mapping columns to be consistent with GO mapping
colnames(gene_kegg_mapping) <- c('gene', 'category')
colnames(kegg_pathways) <- c('category', 'name', 'class', 'description')

kegg_pathways <- unique(kegg_pathways)

# Assay data (RNA-Seq count table)
assay_data <- as.matrix(count_table)

# Sort rows by gene id
assay_data <- assay_data[order(row.names(assay_data)),]

# Pheno data (sample information)
pheno_data <- new("AnnotatedDataFrame",
                 data.frame(sample=sample_ids, condition=condition, batch=batch))
sampleNames(pheno_data) <- colnames(assay_data)

# Feature data (gene annotations)
gene_info <- gene_info[order(gene_info$gene_id),]
feature_data <- new("AnnotatedDataFrame", as.data.frame(gene_info))

#featureNames(feature_data) <- rownames(assay_data)
featureNames(feature_data) <- gene_info$gene_id

# List to store counts used for co-expression analysis
network_counts = list()

network_counts$raw <- new("ExpressionSet", exprs=assay_data,
                        phenoData=pheno_data, featureData=feature_data)

reps_per_batch <- table(factor(condition))
min_replicates <- min(reps_per_batch)
network_counts$raw <- filter_lowcount_genes(network_counts$raw,
                                           threshold=CONFIG$low_count_threshold,
                                           min_samples=min_replicates,
                                           verbose=FALSE)

# Filter by gene id or type
ncrna_mask <- rep(FALSE, nrow(network_counts$raw))

if (!is.null(CONFIG$id_filter_string)) {
  ncrna_mask <- ncrna_mask | grepl(CONFIG$id_filter_string,
                                  rownames(network_counts$raw))
}

if (!is.null(CONFIG$type_filter_string)) {

```

```

gene_types <- (gene_info %>% filter(gene_id %in% rownames(network_counts$raw)))$type
ncrna_mask <- ncrna_mask | grepl(CONFIG$type_filter_string, gene_types)
}
network_counts$raw <- network_counts$raw[!ncrna_mask,]

# Keep annotations for remaining genes only
gene_info <- gene_info[gene_info$gene_id %in% rownames(network_counts$raw),]

# Create copies of raw count ExpressionSet
network_counts$log2cpm <- network_counts$raw

# Keep a copy of the Log2-CPM normalized counts for plotting purposes
exprs(network_counts$log2cpm) <- log2(counts_per_million(exprs(network_counts$raw)) + 0.5)

# Differential expression parameters
counts <- network_counts
batch_adjust <- CONFIG$network_batch_adjust
quantile_normalize <- CONFIG$network_quantile_normalize
use_cpm <- CONFIG$network_cpm
use_log2 <- CONFIG$network_log2
use_voom <- CONFIG$network_voom
robust_ebayes <- CONFIG$network_ebayes_robust

# Apply voom/quantile normalization on counts
counts$normed <- counts$raw

# voom (includes log2-CPM transformation)
if (use_voom) {
  # quantile normalize?
  norm_method <- ifelse(quantile_normalize, 'quantile', 'none')

  # voom data
  voom_result <- voom(exprs(counts$raw), design_condition_only,
    normalize.method=norm_method,
    plot=FALSE)

  # create normed_counts
  exprs(counts$normed) <- voom_result$E
} else {
  # Based on a suggestion from HCB, we will apply quantile normalization
  # prior to logging when CPM is not used. This is in contrast to voom
  # which applies qnorm after log-CPM transforming the data.
  gene_ids <- rownames(counts$normed)

  # Counts-per-million
  if (use_cpm) {
    exprs(counts$normed) <- counts_per_million(exprs(counts$raw))

    # Log2 transformation
    if (use_log2) {
      exprs(counts$normed) <- log2(exprs(counts$normed) + 0.5)
    }

    # Quantile normalize?

```



```

    if (quantile_normalize) {
      exprs(counts$normed) <- normalize.quantiles(exprs(counts$normed))
    }
  } else {
    # Quantile normalize?
    if (quantile_normalize) {
      exprs(counts$normed) <- normalize.quantiles(exprs(counts$normed))
    }

    # Log2 transformation
    if (use_log2) {
      exprs(counts$normed) <- log2(exprs(counts$normed) + 0.5)
    }
  }
  rownames(counts$normed) <- gene_ids
  colnames(counts$normed) <- sample_ids
}

```

```
counts$final <- counts$normed
```

```
# Store transformed network counts
```

```
network_counts <- counts
```

```
# Update condition, batch, etc. to include only network-specific samples
```

```
condition <- factor(CONFIG$wgcn_samples[[CONFIG$condition]])
```

```
batch <- factor(CONFIG$wgcn_samples[[CONFIG$batch]])
```

```
# Samples to use for network construction
```

```
sample_ids_network <- as.character(CONFIG$wgcn_samples[[CONFIG$sample_id]])
```

```
network_sample_mask <- sampleNames(network_counts$raw) %in% sample_ids_network
```

```
covariates <- covariates[network_sample_mask,]
```

```
# drop samples not used in network construction
```

```
network_counts$final <- network_counts$final[,network_sample_mask]
```

```
# Update gene annotations
```

```
gene_info <- gene_info[gene_info$gene_id %in% rownames(network_counts$final),]
```

```
# Update rows and columns for each version of network_counts to only
```

```
# include those genes that remain in network_counts$final
```

```
gene_ids <- rownames(network_counts$final)
```

```
for (name in names(network_counts)) {
```

```
  # Update network count tables
```

```
  if (ncol(network_counts[[name]]) == length(network_sample_mask)) {
```

```
    sample_ind <- network_sample_mask
```

```
  } else {
```

```
    sample_ind <- rep(TRUE, ncol(network_counts[[name]]))
```

```
  }
```

```
  network_counts[[name]] <- network_counts[[name]][rownames(network_counts[[name]]) %in% gene_ids, sample_ind]
```

```
}
```

```

# WGCNA count input
wgcna_input <- exprs(network_counts$final)

# Convert to float (necessary for cor)
wgcna_input <- wgcna_input * 1.0

# Combination of Pearson correlation and Euclidean distance
cor_matrix <- cor(t(wgcna_input))
dist_matrix <- as.matrix(dist(wgcna_input, diag=TRUE, upper=TRUE))
dist_matrix <- log1p(dist_matrix)
dist_matrix <- 1 - (dist_matrix / max(dist_matrix))

similarity_matrix <- sign(cor_matrix) * ((abs(cor_matrix) + dist_matrix) / 2)

# clean-up
rm(cor_matrix)
rm(dist_matrix)
gc()

# Set the diagonal to zero to remove uninformative correlations
diag(similarity_matrix) <- 0

# Construct adjacency matrix
adjacency_matrix <- adjacency.fromSimilarity(similarity_matrix,
                                             power=CONFIG$adjmatrix_power,
                                             type=CONFIG$network_type)

# Delete similarity matrix to free up memory
rm(similarity_matrix)
gc()

# Convert to matrix
adjacency_matrix <- matrix(adjacency_matrix, nrow=nrow(adjacency_matrix))
rownames(adjacency_matrix) <- gene_ids
colnames(adjacency_matrix) <- gene_ids

# Dissimilarity matrix (used for clustering distance metric)
dissimilarity_matrix <- 1 - adjacency_matrix

# Delete adjacency matrix for now to free up memory
rm(adjacency_matrix)
gc()

# Create a transposed version of the count table
sample_counts <- as.data.frame(t(wgcna_input))

# Cluster gene expression profiles
gene_tree <- flashClust(as.dist(dissimilarity_matrix), method="average")

# 2015/11/05: Work-around for cutree bug:
# "the 'height' component of 'tree' is not sorted (increasingly)"
# See: https://stat.ethz.ch/pipermail/r-help/2008-May/163409.html
gene_tree$height <- round(gene_tree$height, 6)

```

```

module_labels <- cutreeDynamicTree(dendro=gene_tree,
                                  deepSplit=CONFIG$deep_split,
                                  minModuleSize=CONFIG$min_module_size)
module_colors <- labels2colors(module_labels)

num_genes <- ncol(sample_counts)
num_samples <- nrow(sample_counts)

# Calculate eigengenes
module_eigengenes <- moduleEigengenes(sample_counts,
                                       colors=module_colors)$eigengenes

# total number of modules remaining after merge
num_modules <- length(unique(module_colors))

# Create result data frame
result <- cbind(gene_info, color=module_colors)

# drop unneeded columns
keep_cols <- intersect(c('gene_id', 'color', 'description', 'chromosome',
                        'strand', 'transcript_length'), colnames(result))
result <- tbl_df(result[,keep_cols])

# add expression-related fields
result$expr_variance <- apply(wgcna_input, 1, var)
result$expr_mean <- apply(wgcna_input, 1, mean)

# Recreate adjacency matrix and free up space from dissimilarity matrix
adjacency_matrix <- 1 - dissimilarity_matrix
rm(dissimilarity_matrix)
gc()

COEXPRESSION_NETWORK_RESULT <- list(
  adj_matrix=adjacency_matrix,
  wgcna_input=wgcna_input,
  gene_tree=gene_tree,
  gene_info=gene_info,
  module_colors=module_colors,
  module_eigengenes=module_eigengenes,
  result=result
)

# replace color names with module numbers; modules of interest are first
# assigned lower numbers and remaining modules assigned arbitrary numbers
modules_of_interest <- c('turquoise', 'pink', 'cornflowerblue', 'lightskyblue3',
                        'brown', 'skyblue3', 'lightblue1', 'purple',
                        'antiquewhite4', 'firebrick2', 'indianred4',
                        'lightpink4', 'green2', 'blueviolet', 'salmon1',
                        'indianred2', 'orangered4', 'palevioletred1',
                        'skyblue4', 'pink1', 'pink2', 'tomato4',
                        'lightcyan', 'thistle1', 'saddlebrown', 'honeydew1',
                        'darkslateblue', 'blue', 'wheat3', 'magenta3', 'tan4',
                        'darkseagreen2', 'darkviolet', 'paleturquoise',
                        'grey', 'orange3', 'skyblue1', 'sienna3',

```

```

        'greenyellow', 'lavenderblush', 'lightpink1',
        'antiquewhite1', 'brown4', 'midnightblue',
        'darkolivegreen1')
remaining_modules <- unique(module_colors)[!unique(module_colors) %in%
                                modules_of_interest]
module_label_mapping <- rbind(cbind(modules_of_interest,
                                seq_along(modules_of_interest)),
                             cbind(remaining_modules,
                                seq_along(remaining_modules) +
                                length(modules_of_interest)))

module_label_mapping <- as.data.frame(module_label_mapping)
colnames(module_label_mapping) <- c('color', 'number')

# replace colors with numbers
module_colors <- module_label_mapping$number[match(module_colors,
                                                    module_label_mapping$color)]
result$color <- module_label_mapping$number[match(result$color,
                                                    module_label_mapping$color)]

# create output directory
timestring <- format(Sys.time(), "%Y%m%d")

# output directory
output_dir <- file.path(CONFIG$output_dir,
                        sprintf("%s_%s", CONFIG$analysis_name, timestring))
outdir <- file.path(output_dir, 'output')

# Directory to store module enrichment results to
module_output_dir <- file.path(outdir, 'modules')
if (!dir.exists(module_output_dir)) {
  dir.create(module_output_dir, recursive=TRUE)
}

# Data frame of module sizes
module_counts <- c()
for (color in unique(module_colors)) {
  module_counts <- append(module_counts, sum(module_colors == color))
}

# create a mapping from module id to number of genes for later use
module_sizes <- data.frame(
  module_id=unique(module_colors),
  num_genes=module_counts
)

```

## Co-expression modules

```

# To get a sense for how the genes were clustered, let's plot a subset of
# the expression profiles and highlight the genes in each module.
combined_counts <- combine_replicates(exprs(network_counts$final), condition)
combined_counts_table <- cbind(gene_id=rownames(network_counts$final),

```

```

combined_counts)

# convert to long
counts_long <- melt_counts(combined_counts, CONFIG$condition_mapping)
colnames(counts_long) <- c('gene_id', 'condition', 'log_cpm')

# add clustering results and convert to a factor
counts_long <- cbind(counts_long, cluster=as.factor(module_colors))

# save result
COEXPRESSION_NETWORK_RESULT$counts_long <- counts_long

# load list of genes to highlight
genes_of_interest <- read_tsv('../settings/genes_of_interest.tsv')

## Parsed with column specification:
## cols(
##   gene_id = col_character(),
##   description = col_character(),
##   group = col_character(),
##   subgroup = col_character()
## )

# fix newlines
genes_of_interest$subgroup <- gsub('\\\\\\n', '\\n', genes_of_interest$subgroup)

# set default line color and linetype
genes_of_interest$color <- '#BOBOBO'
genes_of_interest$linetype <- 'solid'

# Assign a separate color palette for each group and subgroup
gene_groups <- unique(genes_of_interest$group)

# list of linetypes to use when differentiating subgroups
linetypes <- rep(c("solid", "dashed", "longdash", "F1", "dotted", "dotdash",
                  "twodash", "1F", "4C88C488", "12345678"), 2)

# Palettes: Purple, Green, Red, Blue
palette_ranges <- list(rev(c('#FFAAD4', '#800007')), rev(c('#99FFFC', '#060042')),
                      rev(c('#8CAB8C', '#004200')), rev(c('#F2D69D', '#A86000')))

color_palettes <- lapply(palette_ranges, colorRampPalette, space='Lab')
names(color_palettes) <- gene_groups

# iterate over main gene groups
for (gene_group in gene_groups) {
  # get a palette
  genes <- genes_of_interest %>% filter(group == gene_group)
  num_subgroups <- length(unique(genes$subgroup))
  pal <- color_palettes[[gene_group]](num_subgroups)

  ltypes <- linetypes[1:num_subgroups]

  # iterate over gene sub-groups

```

```

gene_subgroups <- unique(genes$subgroup)

for (i in seq_along(gene_subgroups)) {
  gene_subgroup <- gene_subgroups[i]
  genes_in_subgroup <- (genes %>% filter(subgroup == gene_subgroup))$gene_id
  genes_of_interest[genes_of_interest$gene_id %in% genes_in_subgroup, 'color'] <- pal[i]
  genes_of_interest[genes_of_interest$gene_id %in% genes_in_subgroup, 'linetype'] <- ltypes[i]
}
}

# Subgroup color mapping
color_mapping <- unique(genes_of_interest %>% select(subgroup, color))
color_mapping <- rbind(color_mapping, c('Other', '#BOBOB0'))

# Linetype mapping
linetype_mapping <- unique(genes_of_interest %>% select(subgroup, linetype))
linetype_mapping <- rbind(linetype_mapping, c('Other', 'solid'))

# Add group information to long counts
counts_long <- merge(counts_long, genes_of_interest, by='gene_id', all.x=TRUE)
counts_long$subgroup[is.na(counts_long$subgroup)] <- "Other"

# work-around to ensure proper stacking order
# http://blog.mckuhn.de/2011/08/ggplot2-determining-order-in-which.html
counts_long$order <- ifelse(counts_long$subgroup == 'Other', 0, 1)
counts_long$gene_id <- factor(paste0(counts_long$order, counts_long$gene_id))

# Default color
counts_long$color[is.na(counts_long$color)] <- '#BOBOB0'

# Number of modules to include in each plot
modules_per_plot <- 9

# Get a list of all modules, excluding 11 -- accidentally mislabeled in early
# versions of analysis; leaving in to avoid having to change rest of the
# module numbering
module_order <- module_label_mapping$number
#module_order <- module_order[module_order != 11]

num_modules <- length(module_order)

# Split modules into groups of n or less for plotting
module_groups <- split(module_order, ceiling(seq_along(module_order) /
                                             modules_per_plot))

for (i in names(module_groups)) {
  plots <- list()
  counter <- 1

  for (cluster_num in module_groups[[i]]) {
    # colors specified in variable
    cluster_subgroups <- unique((counts_long %>% filter(cluster == cluster_num))$subgroup)

    # get named vector representation of subgroup colors

```

```

x <- color_mapping %>% filter(subgroup %in% cluster_subgroups)
color_scale <- setNames(x$color, x$subgroup)

# get named vector representation of subgroup linetypes
x <- linetype_mapping %>% filter(subgroup %in% cluster_subgroups)
linetype_scale <- setNames(x$linetype, x$subgroup)

# let's also increase the size of the highlighted genes
size_scale <- setNames(ifelse(x$subgroup=='Other', 0.2, 0.8), x$subgroup)

# generate the plot
plt <- module_profile_plot(counts_long, cluster_num,
                           highlight_group='subgroup',
                           scale_color_values=color_scale,
                           scale_size_values=size_scale,
                           scale_linetype_values=linetype_scale,
                           font_size=9,
                           xlabel='Developmental form')

plots[[counter]] <- plt

# save plot to disk
outfile <- sprintf("%s/%s.png", module_output_dir, cluster_num)
ggsave(filename=outfile, plot=plt, width=7, height=5, units='in', dpi=300)

counter <- counter + 1
}
print(do.call("grid.arrange", c(plots, ncol=3)))
}

```

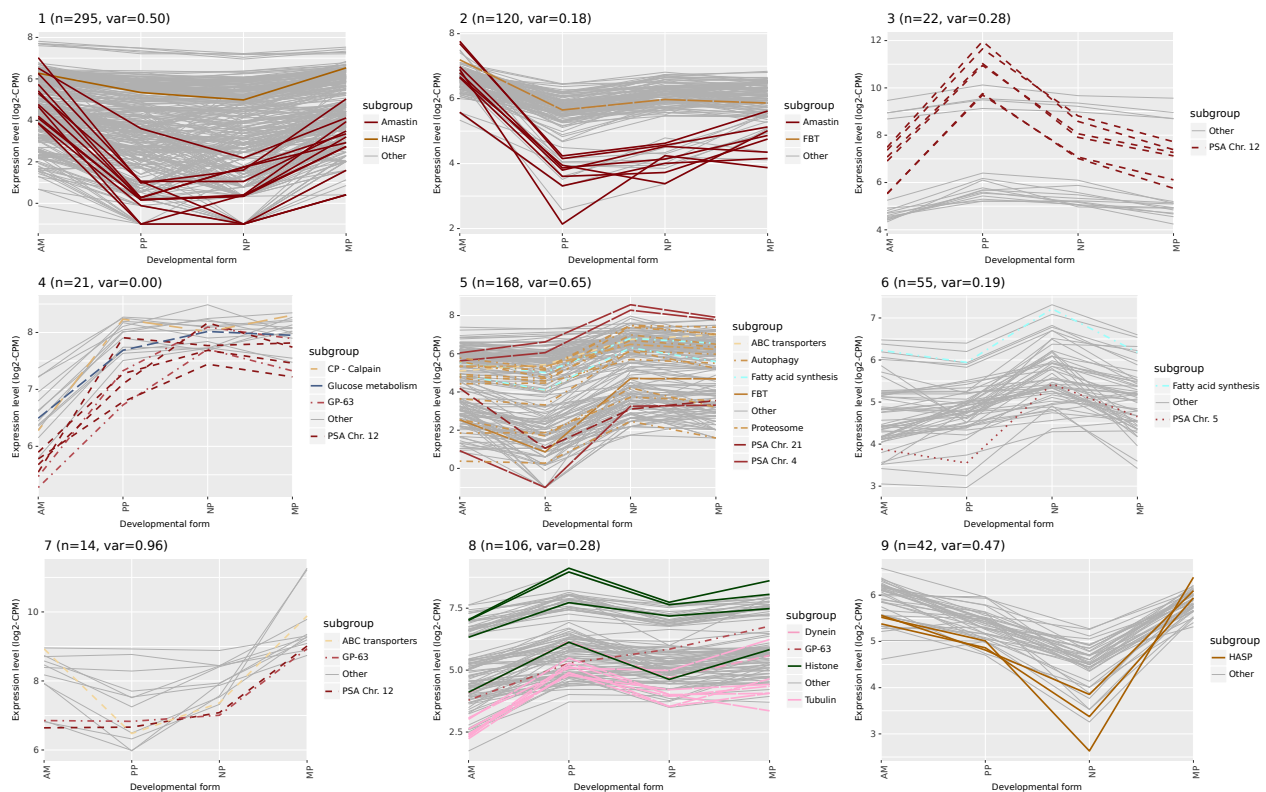



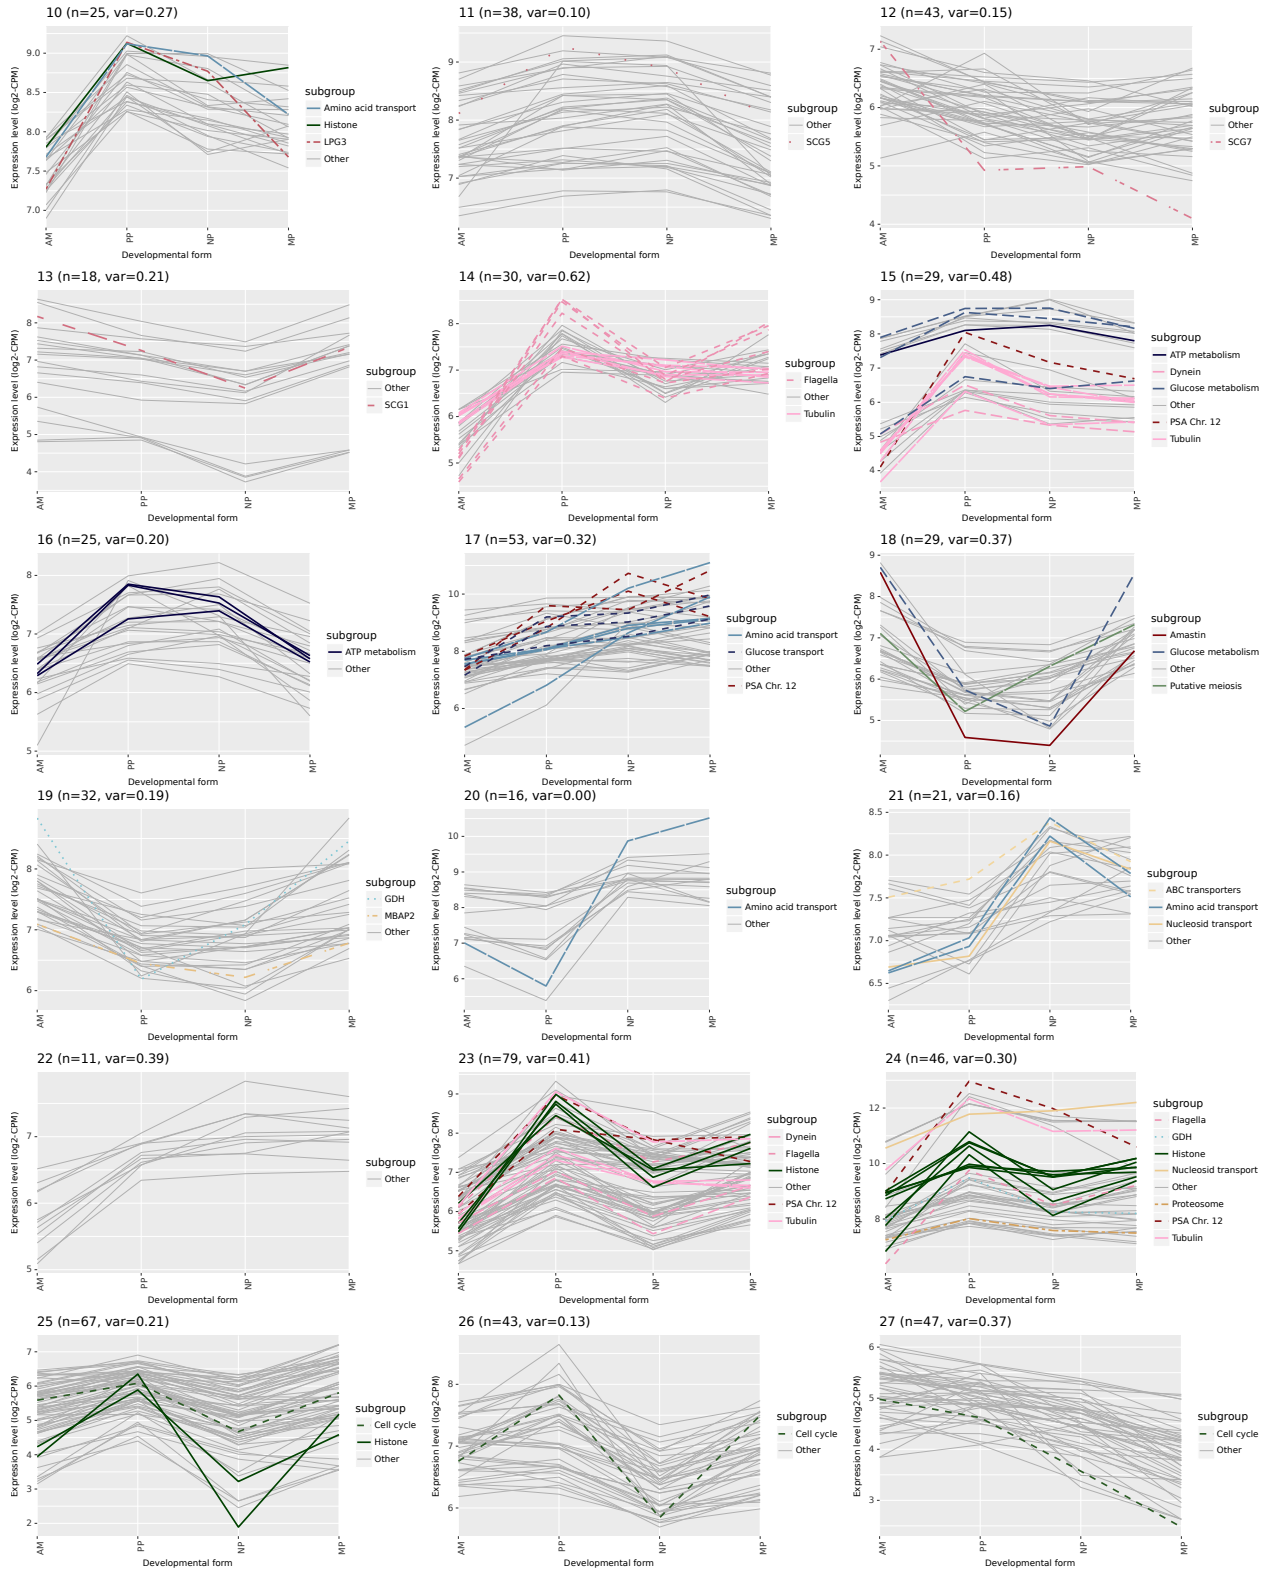



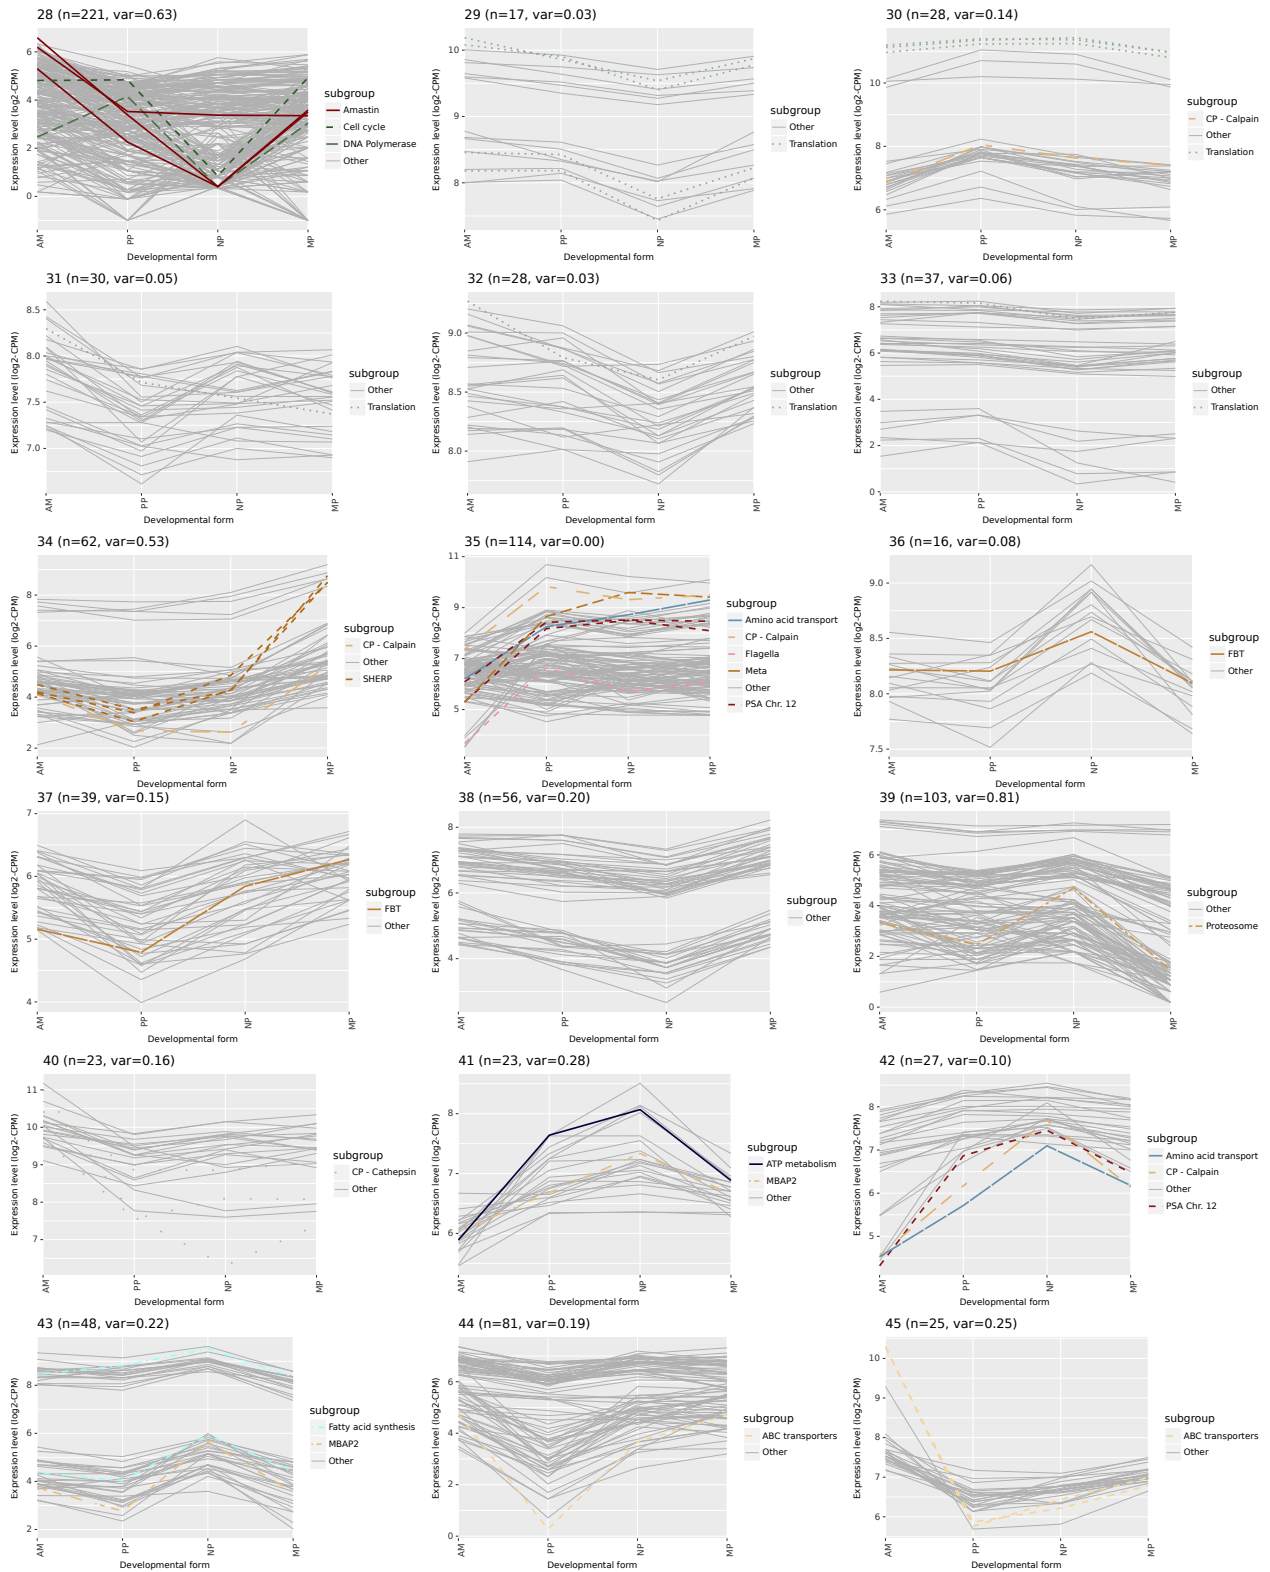

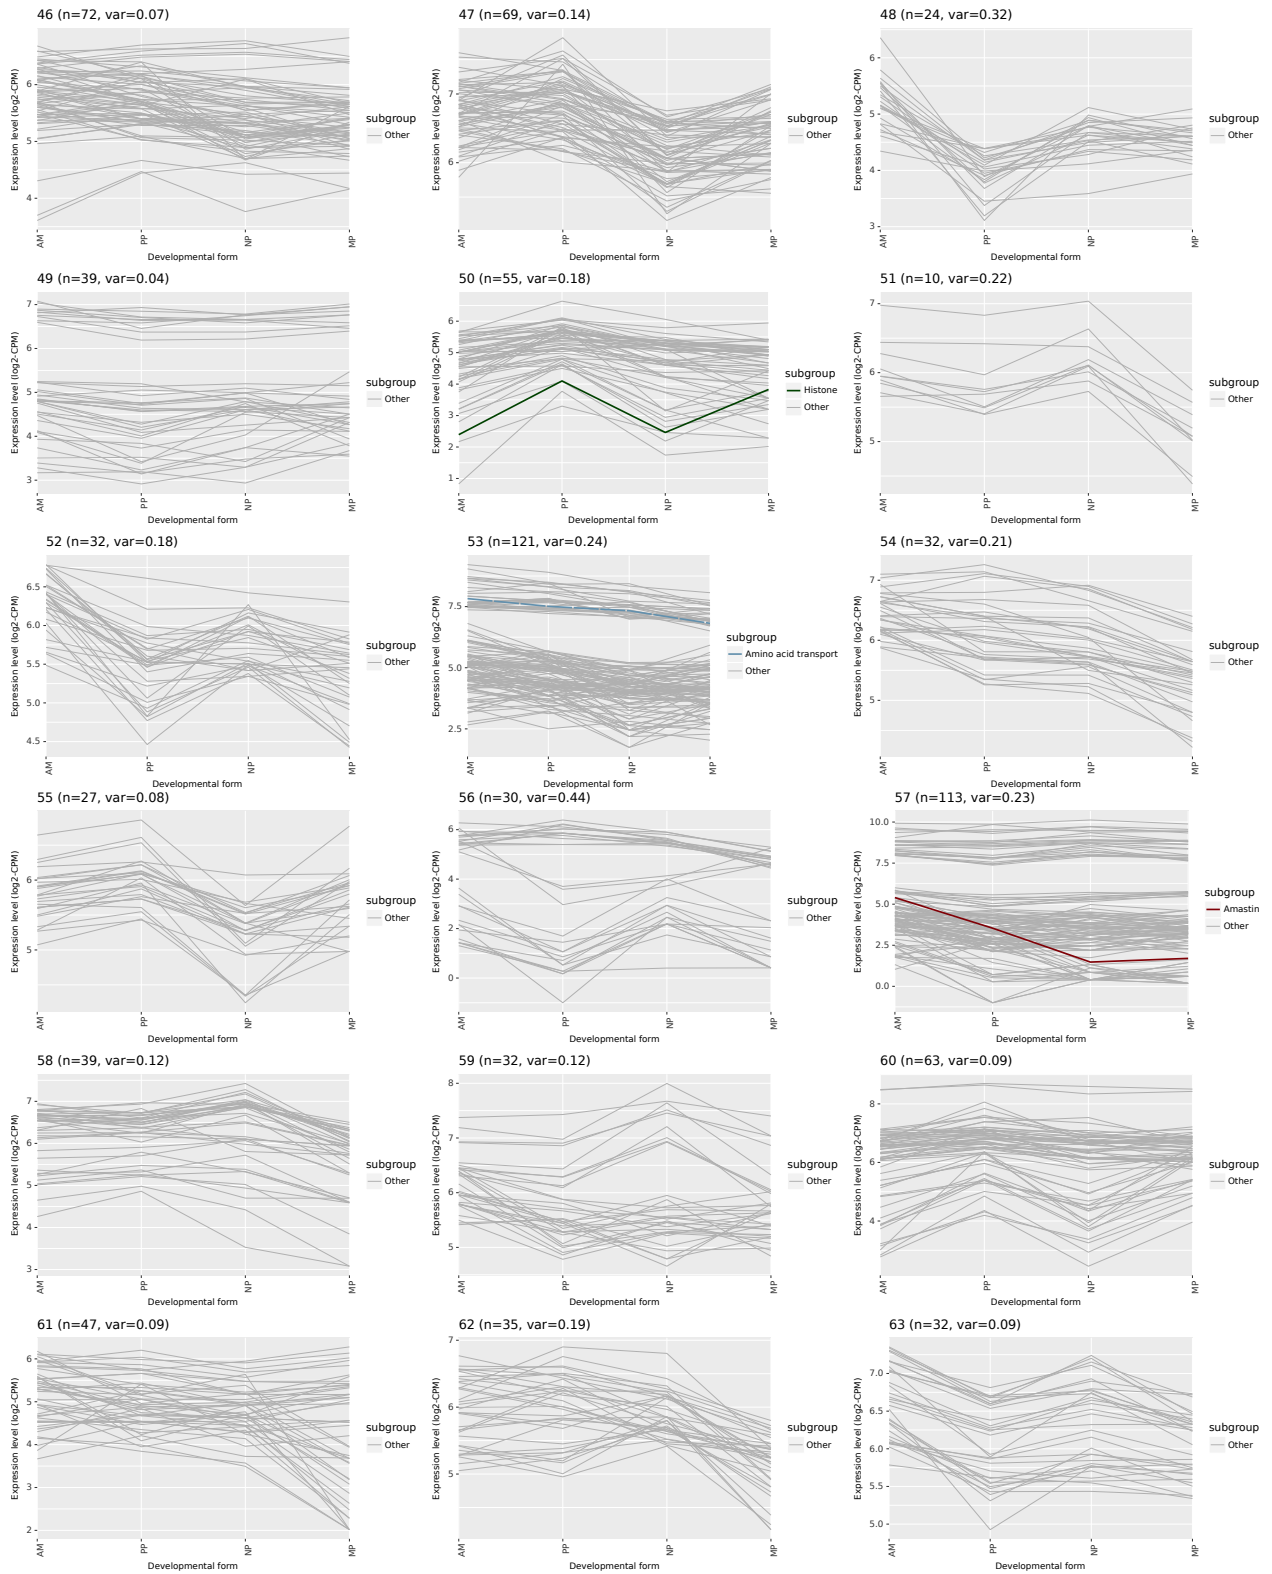

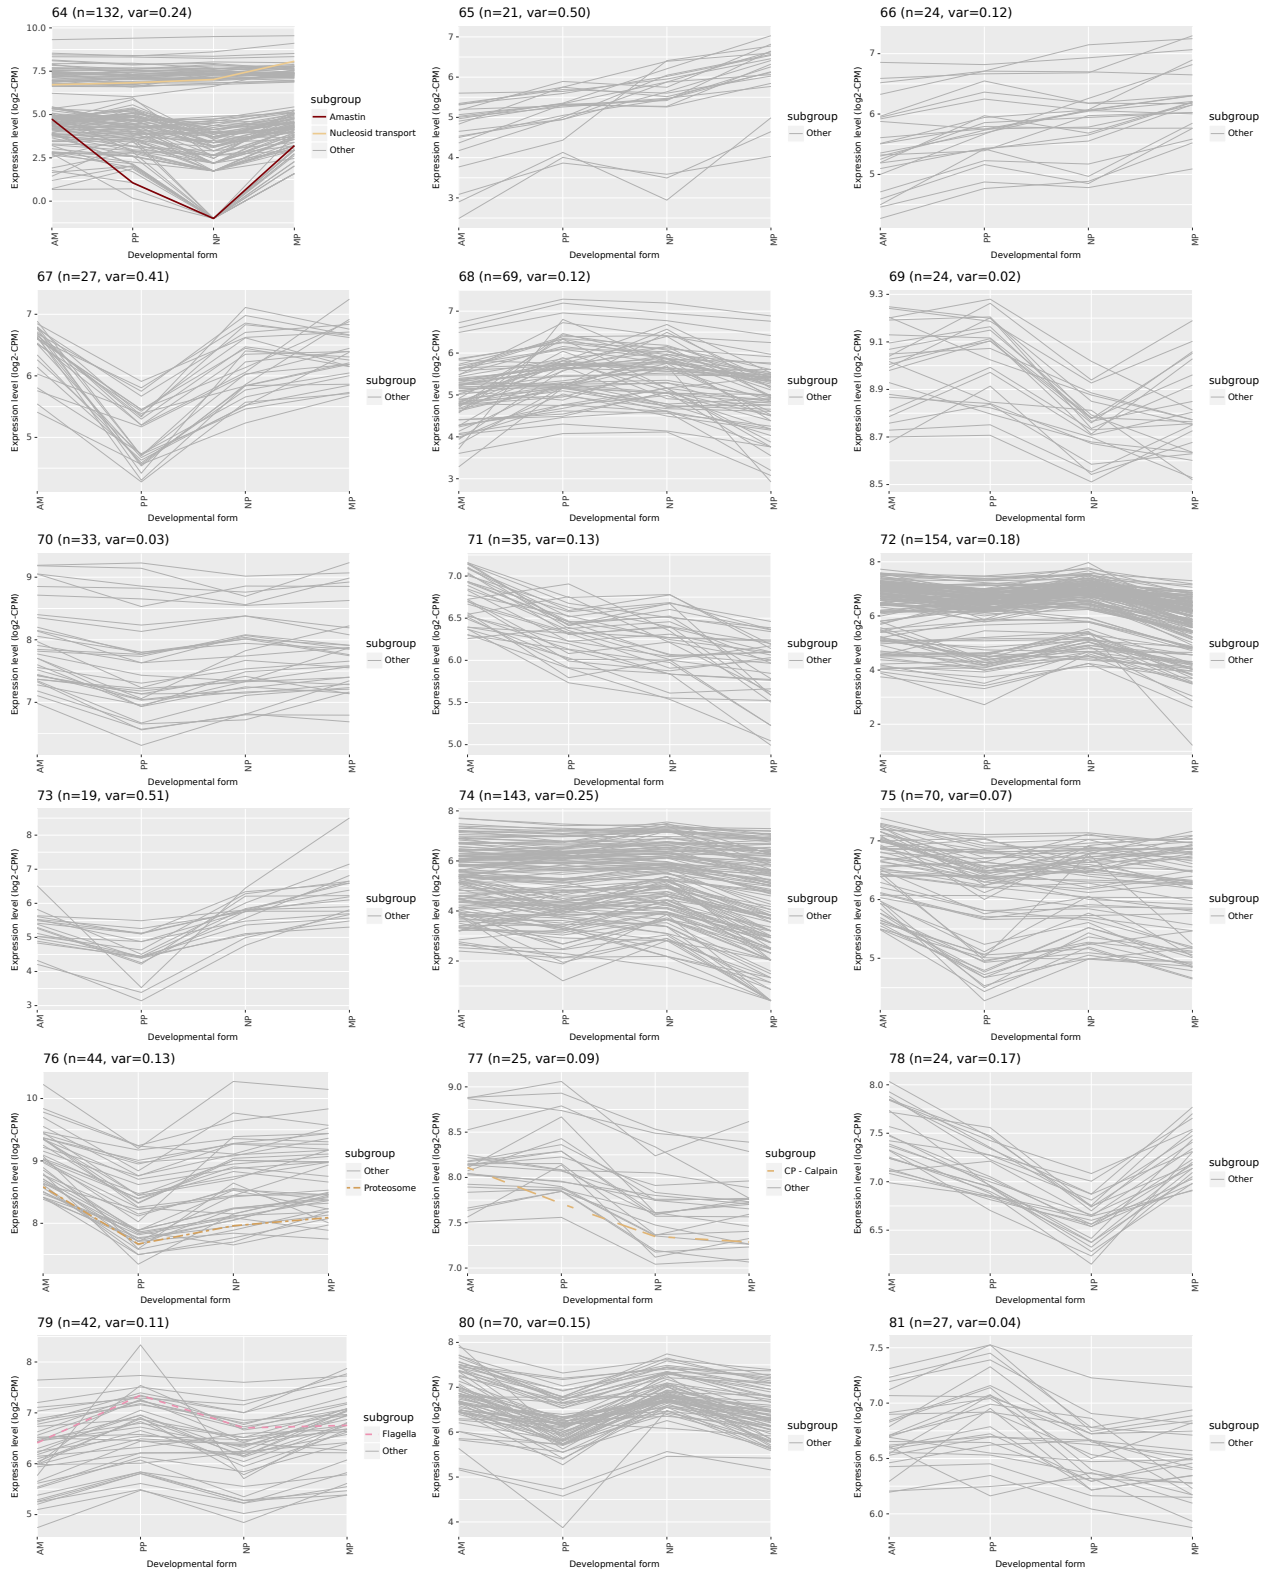

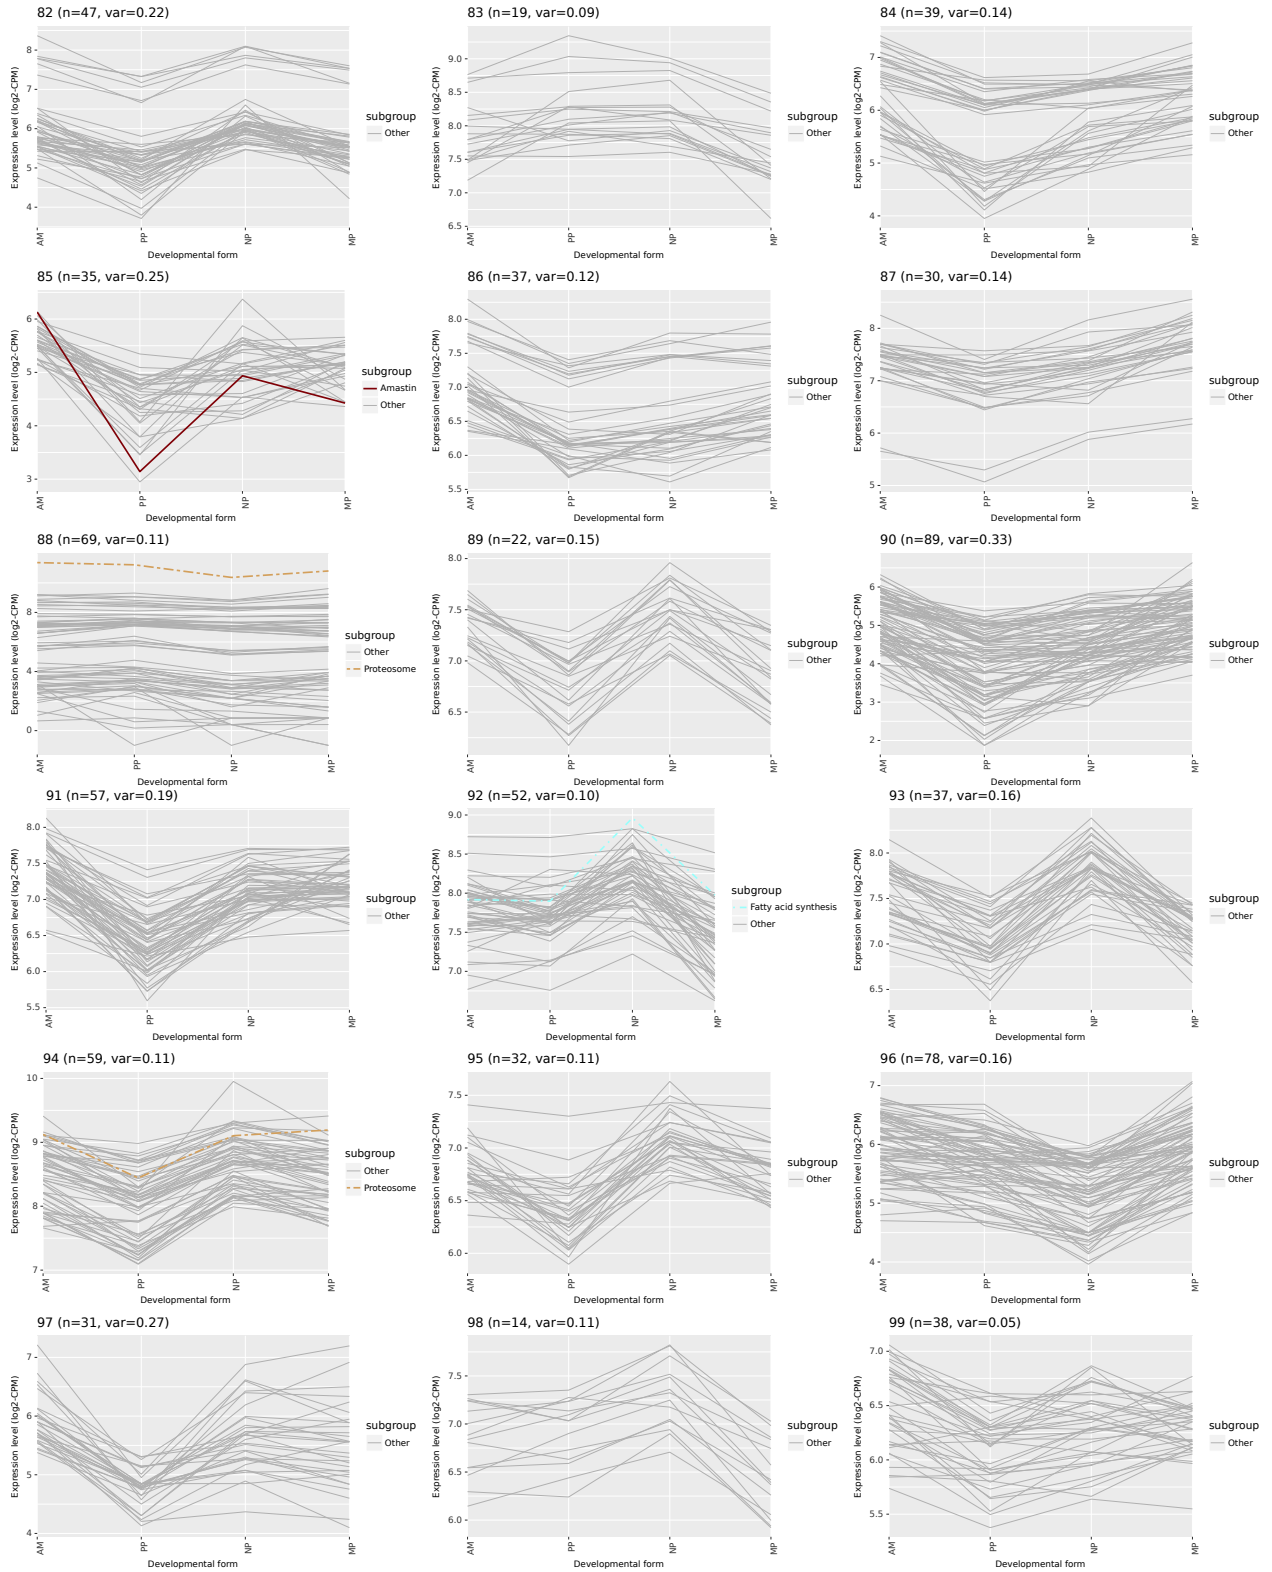

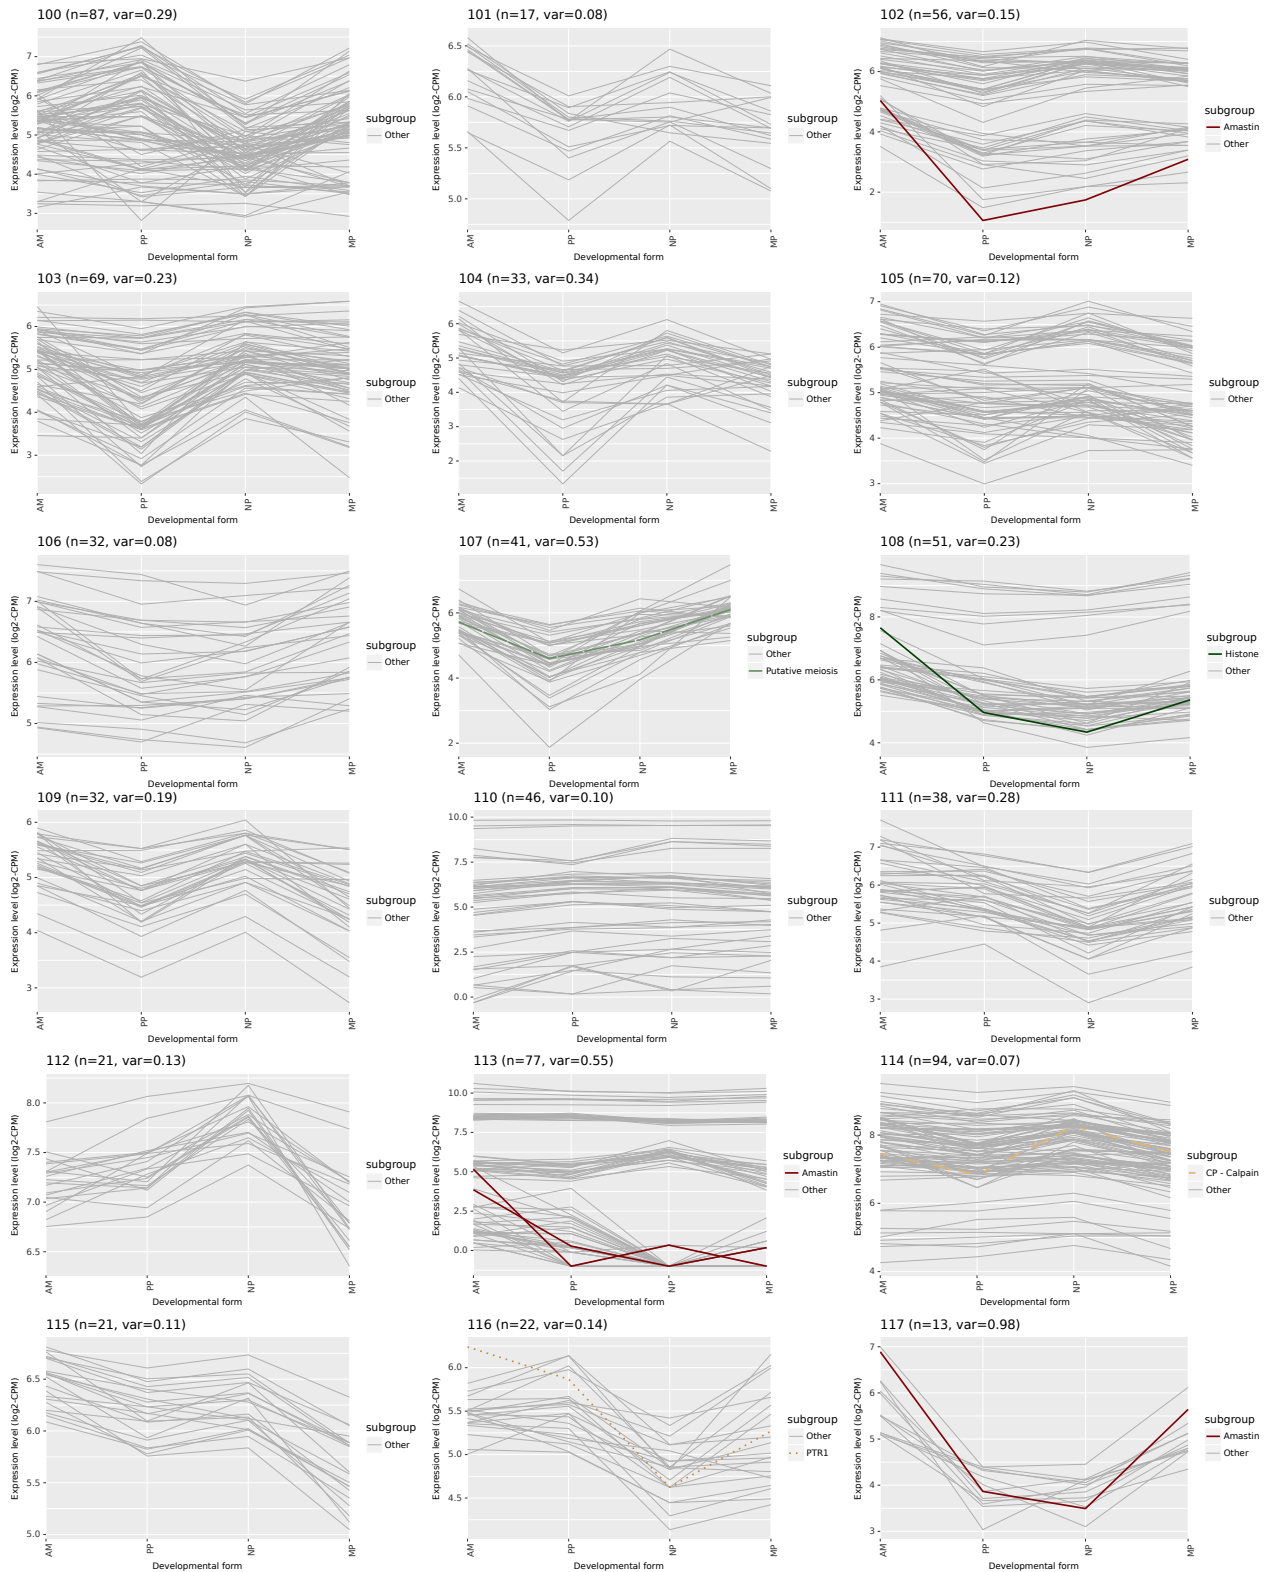



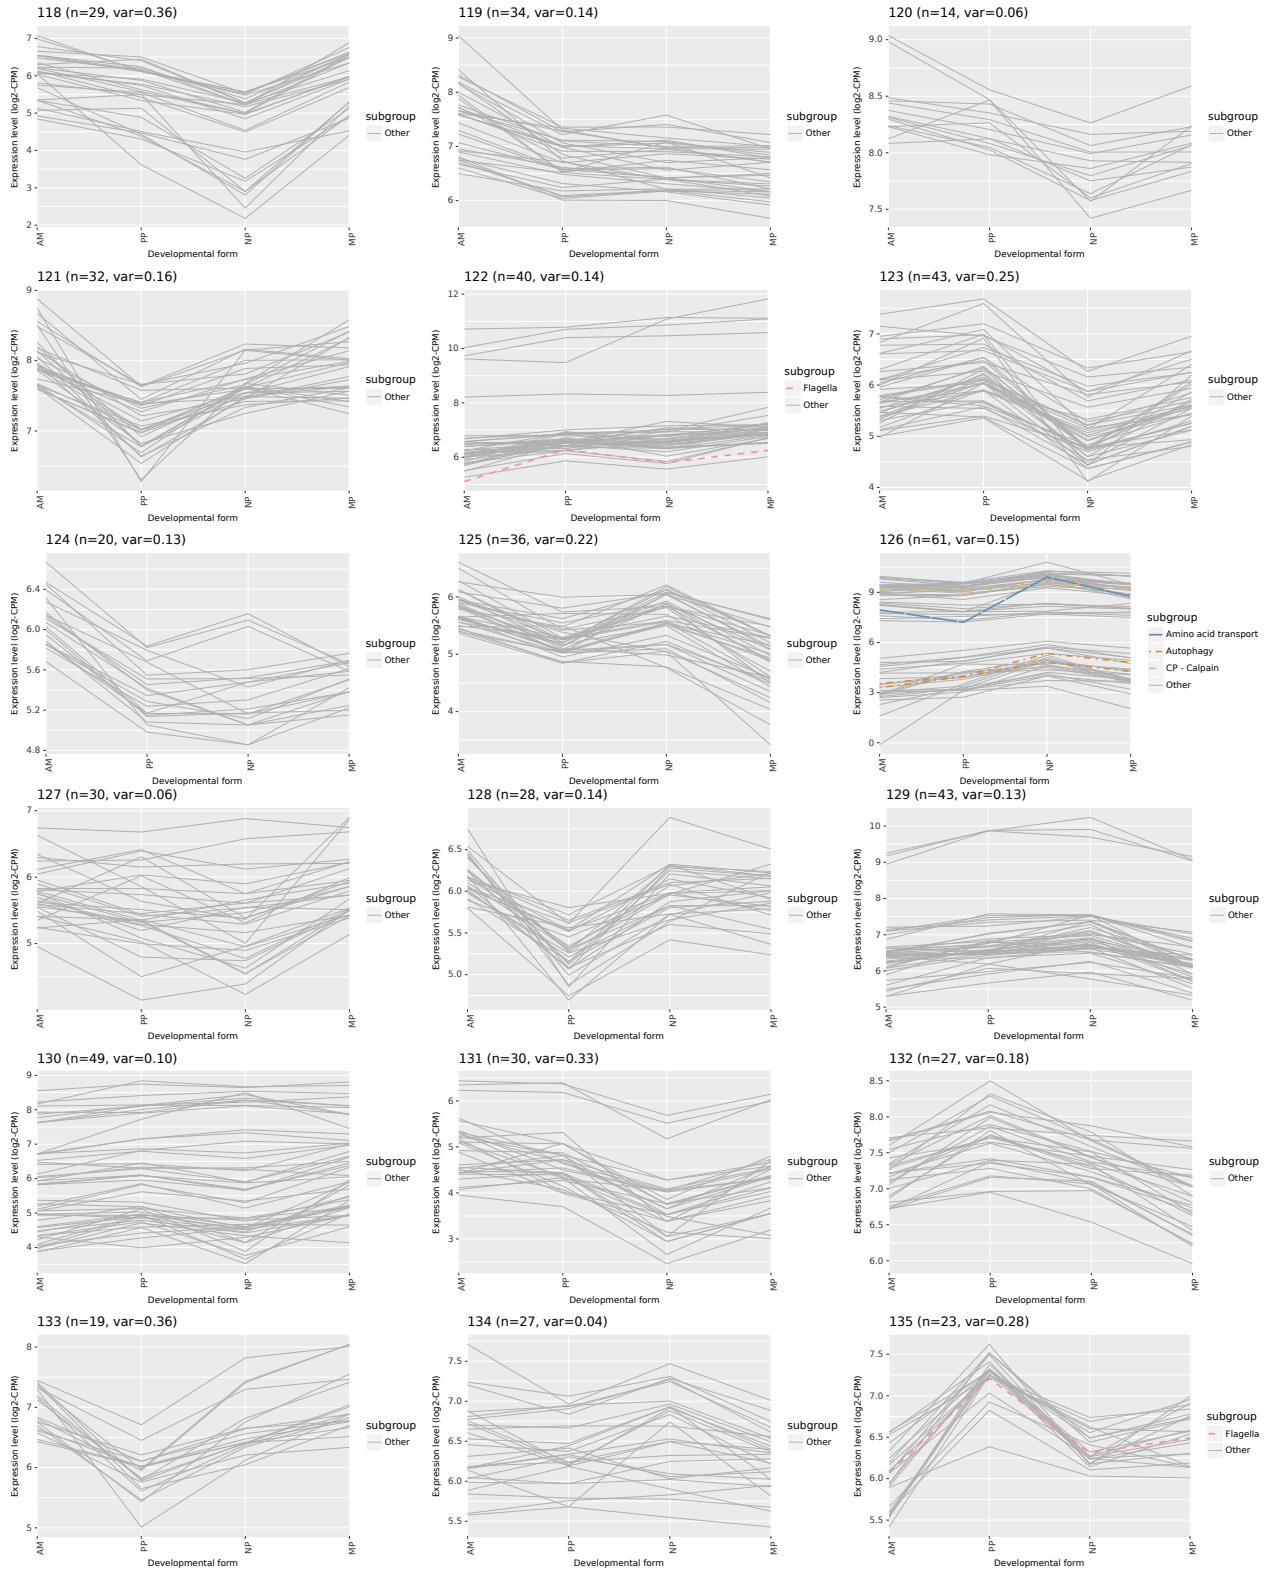

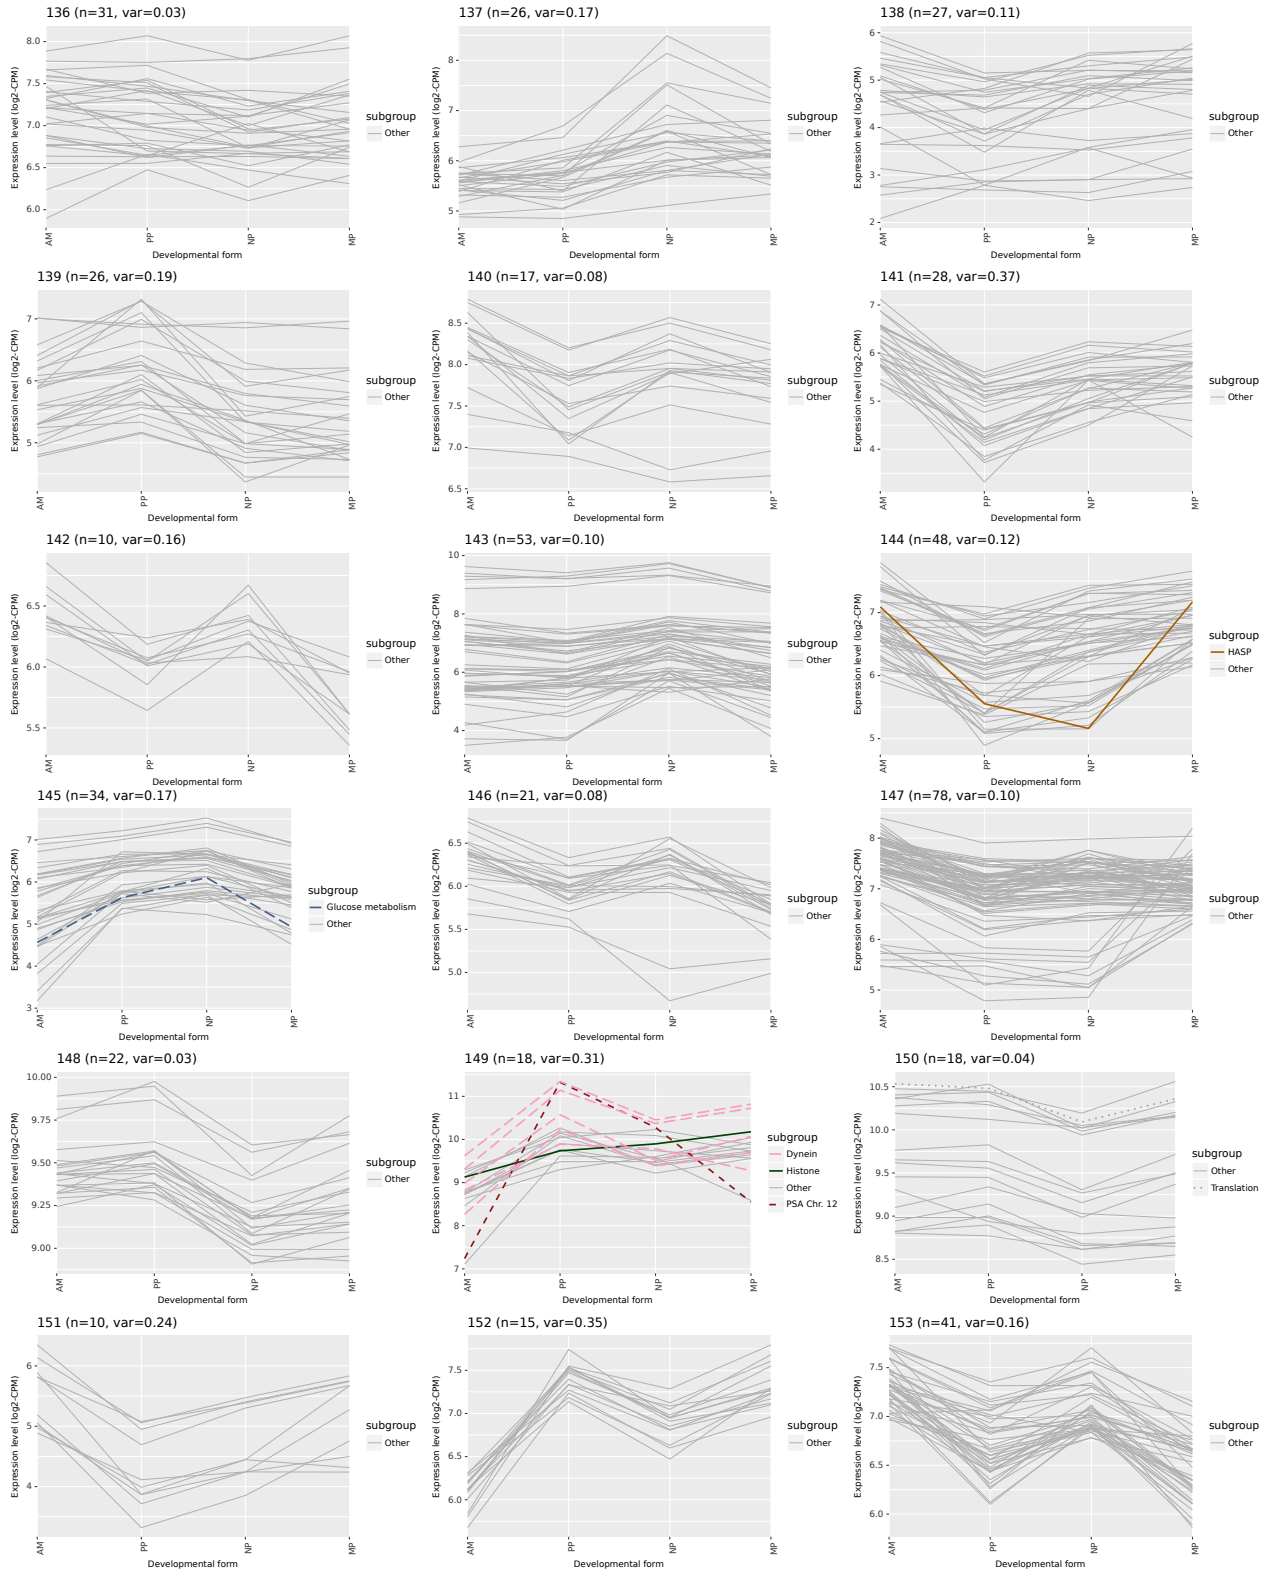

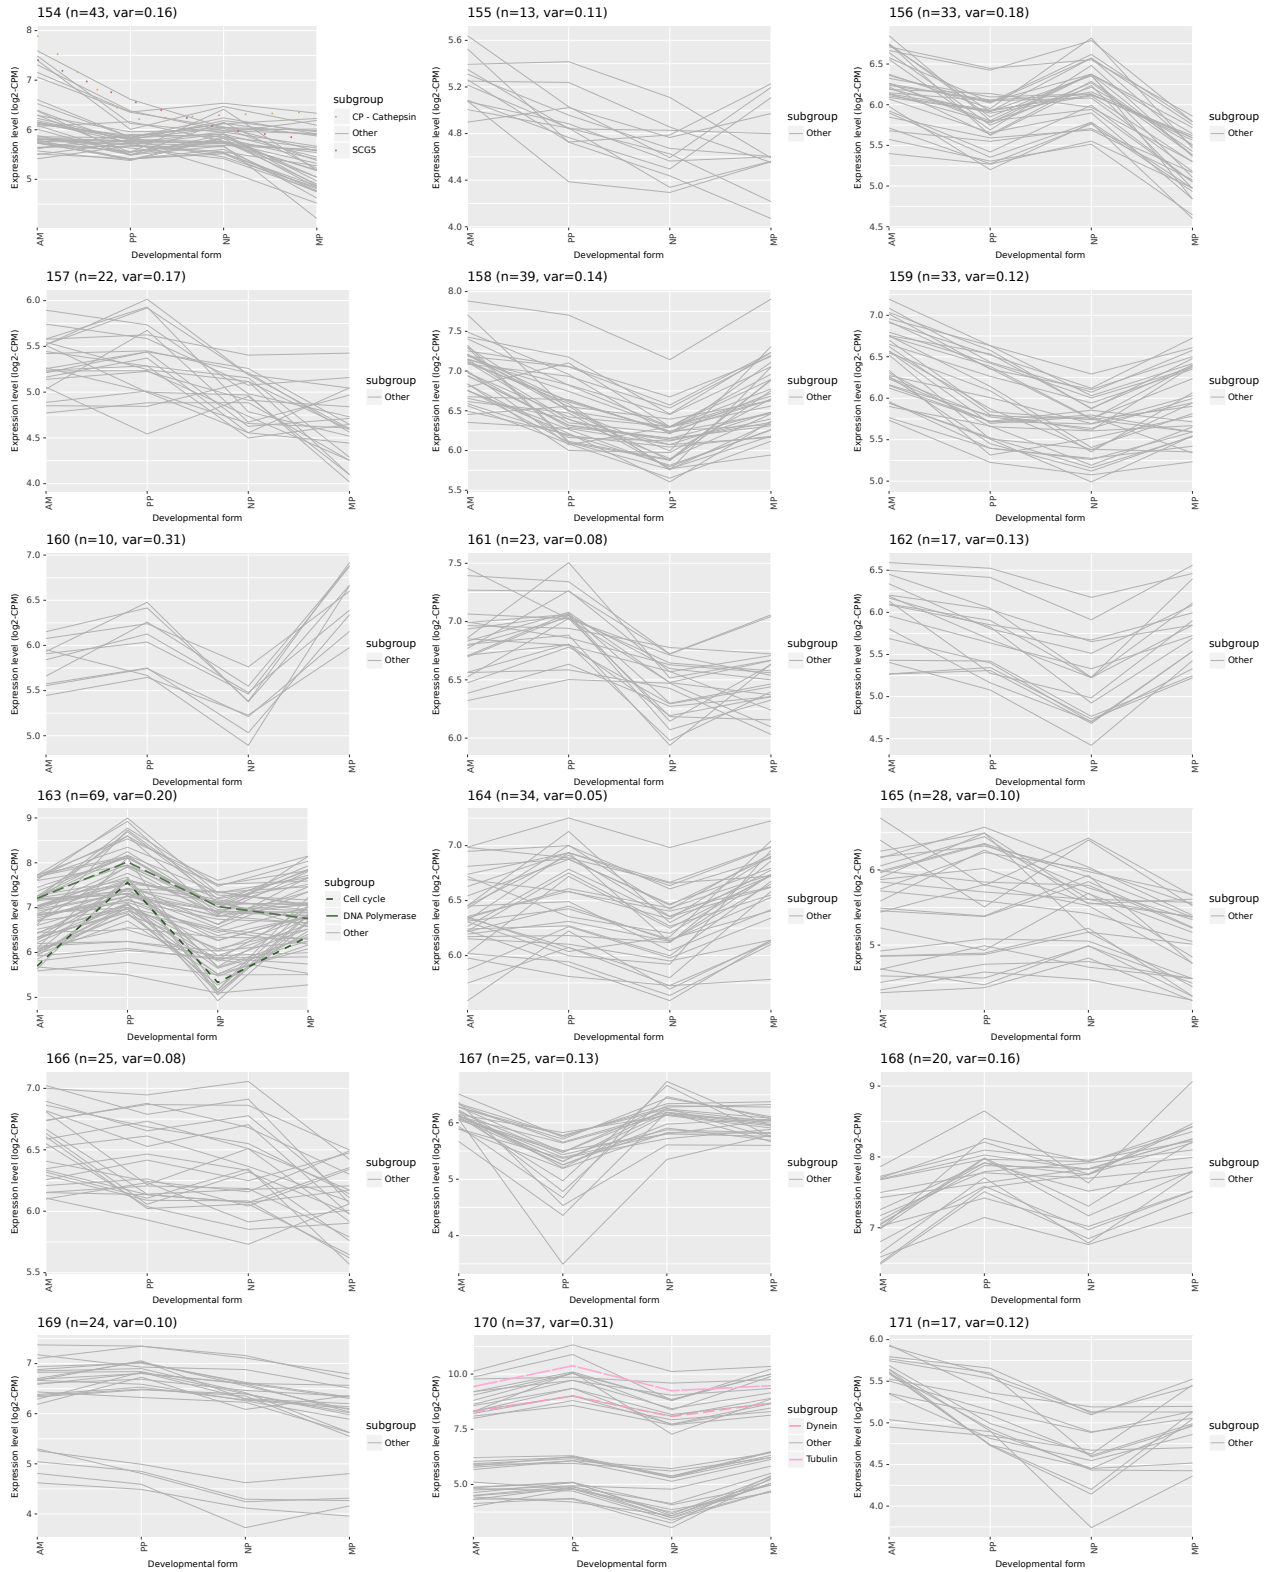





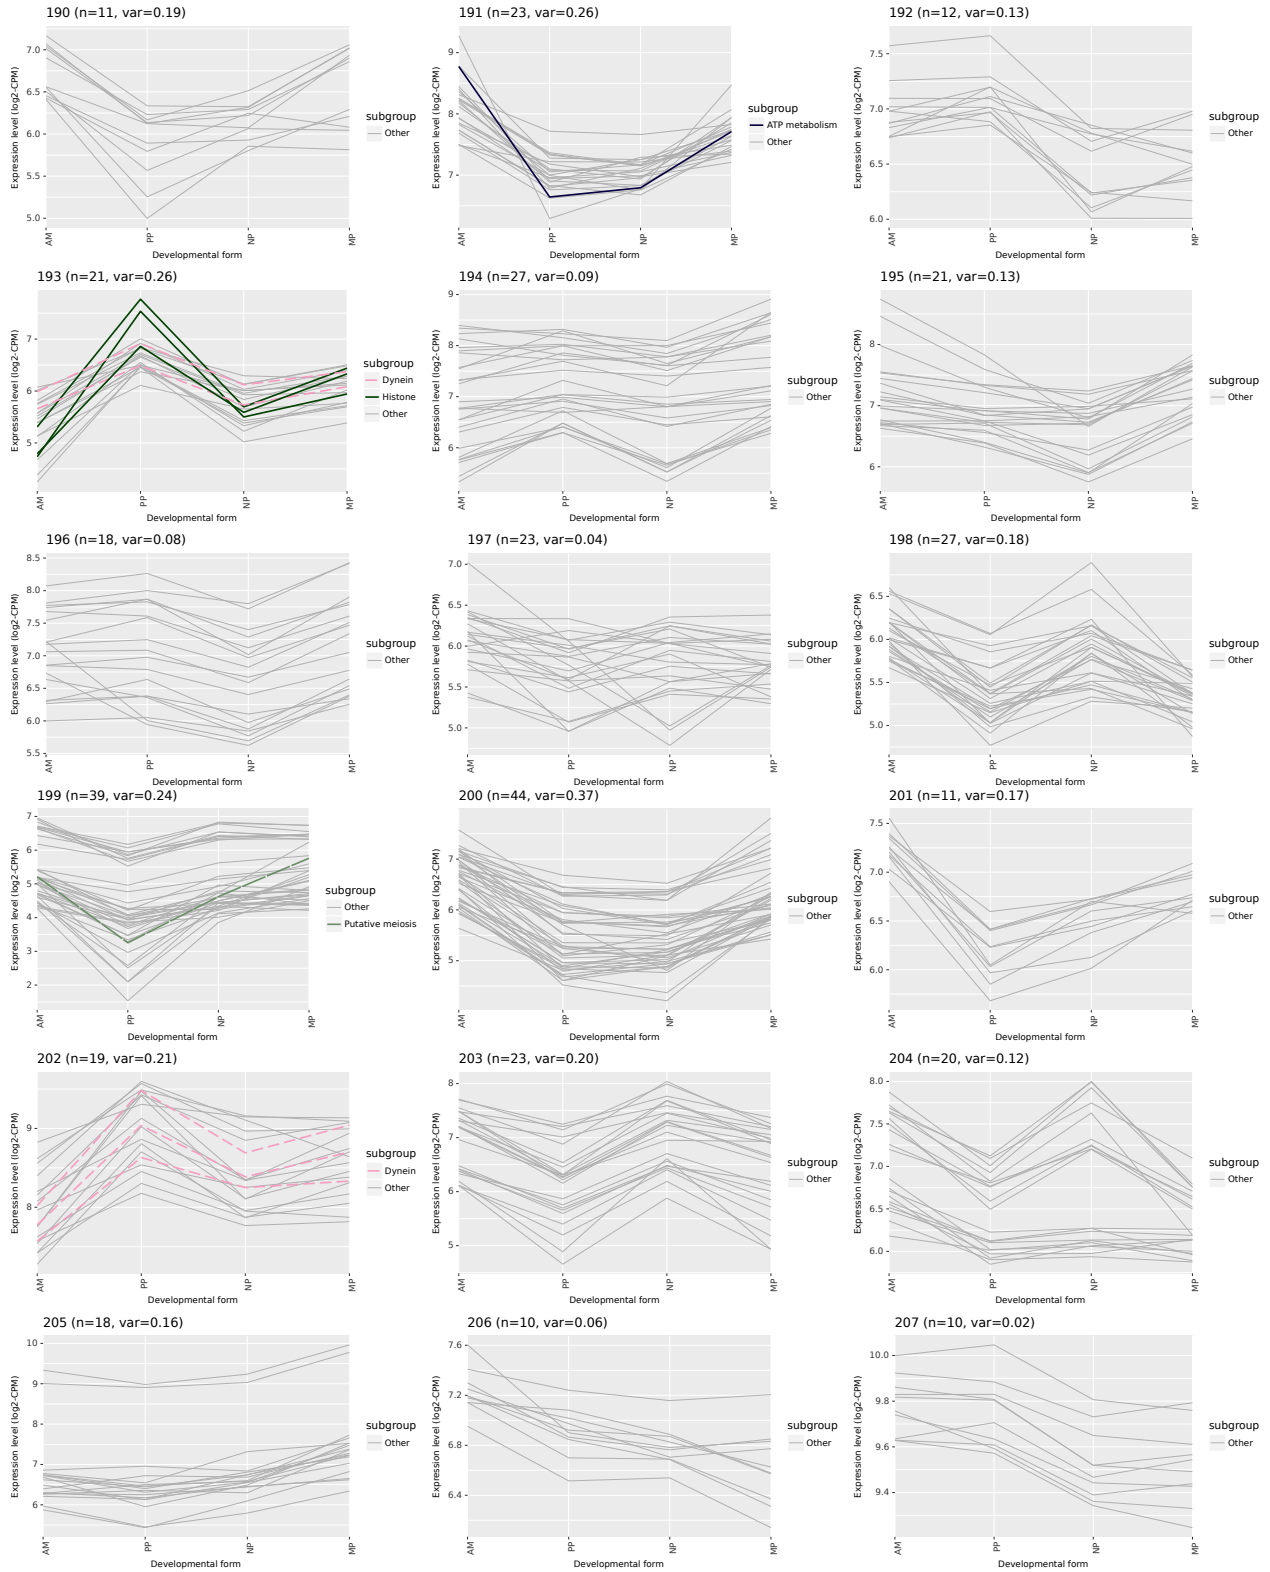

## Average expression profiles for selected co-expression modules

```
##  
## Takes a set of subgroup names, finds the dominant co-expression module for  
## each subgroup, and plots the average co-expression profile for each of  
## those modules.  
##  
plot_dominant_coex_modules <- function(counts_long, genes_of_interest, subgroups, plot_title='',  
                                       additional_modules=NULL) {  
  # find dominant module for each subgroup  
  dominant_modules <- genes_of_interest %>%  
    filter(subgroup %in% subgroups) %>%  
    group_by(subgroup) %>%  
    summarize(dominant_module=names(which.max(table(module_color))))  
  
  # Include any other additional modules manually requested  
  if (!is.null(additional_modules)) {  
    dominant_modules <- rbind(dominant_modules, additional_modules)  
  }  
  
  # Work-around: manually add alpha- and beta-tubulin modules (14 & 15)  
  if (subgroup == 'Surface and structure') {  
    dominant_modules <- rbind(dominant_modules,  
                              data.frame(subgroup=c('Tubulin', 'Tubulin'),  
                                          dominant_module=c('blueviolet',  
                                                             'salmon1')))  
  }  
  
  # add module numbers  
  dominant_modules <- merge(dominant_modules, module_label_mapping,  
                           by.x='dominant_module', by.y='color')  
  
  # compute average expression profiles for each of the dominant modules  
  average_profiles <- counts_long %>%  
    filter(cluster %in% dominant_modules$number) %>%  
    group_by(condition, cluster) %>%  
    summarize(average_log_cpm=median(log_cpm))  
  
  # add labels  
  x <- dominant_modules[match(average_profiles$cluster, dominant_modules$number),]  
  average_profiles$Module <- sprintf("%s\n(module %s)", x$subgroup, x$number)  
  
  # work-around for glucose/AA transport (both associated with the same  
  # co-expression module)  
  average_profiles$Module[average_profiles$Module == 'Amino acid transport\n(Module 17)'] <- 'Glucose  
& Amino acid transport\n(Module 17)'  
  
  # work-around for DNA polymerase (similar issue to above)  
  average_profiles$Module[average_profiles$Module == 'Cell cycle\n(Module 28)'] <- 'DNA Polymerase\n(Module 28)'  
  
  # get color palette  
  pal <- colorRampPalette(brewer.pal(8, 'Set2'))(nrow(dominant_modules))  
  
  # generate plot
```

```

ggplot(average_profiles,
      aes(x=condition, y=average_log_cpm, group=Module, colour=Module)) +
  geom_line(size=1.5) +
  xlab("Developmental stage") +
  ylab("Expression level (log2-CPM)") +
  scale_color_manual(values=pal) +
  scale_x_discrete(expand=c(0,0)) +
  theme(axis.text=element_text(colour="#333333", size=16),
        axis.text.x=element_text(hjust=1),
        legend.key.size = unit(2.5, 'lines'))
}

# extend genes of interest list to include module colors/numbers
genes_of_interest <- merge(genes_of_interest,
                          result %>% select(gene_id, module=number))
genes_of_interest <- merge(genes_of_interest,
                          module_label_mapping %>% transmute(module=number, module_color=number))

# specific functions and modules to generate average expression plots for
subgroups_of_interest <- list(
  'Surface and structure'=c(
    'Amastin', 'PSA Chr. 4', 'PSA Chr. 12', 'GP-63', 'LPG3', 'SCG1',
    'Flagella', 'Tubulin'),
  'Metabolism'=c(
    'ATP metabolism', 'Glucose transport', 'Glucose metabolism',
    'Amino acid transport', 'GDH', 'Ketone bodies', 'Fatty acid synthesis'),
  'Cell cycle'=c('Histone', 'Cell cycle', 'Translation', 'Putative meiosis'),
  'Differentiation, stress, and virulence factors'=c(
    'SHERP', 'Meta', 'Autophagy', 'MBAP2', 'FBT', 'ABC transporters',
    'CP - Cathepsin', 'CP - Calpain', 'HASP')
)

# iterate over subgroups and generate expression profile plots
i = 1

for (subgroup in names(subgroups_of_interest)) {
  # For Metabolism plot, also include relevant cluster 20 (pink1)
  if (subgroup == 'Metabolism') {
    additional_modules <- rbind(c('Amino acid transport', 'pink1'),
                              c('ATP metabolism / P27', 'green3'))
    colnames(additional_modules) <- c('subgroup', 'dominant_module')

    plt <- plot_dominant_coex_modules(counts_long, genes_of_interest,
                                     subgroups_of_interest[[subgroup]],
                                     subgroup, additional_modules)
  } else if (subgroup == 'Cell cycle') {
    # additional modules to include in the plot
    additional_modules <- rbind(c('Putative meiosis', 'palevioletred1'),
                              c('Cell cycle', 'honeydew1'))
    colnames(additional_modules) <- c('subgroup', 'dominant_module')

    plt <- plot_dominant_coex_modules(counts_long, genes_of_interest,
                                     subgroups_of_interest[[subgroup]],

```

```

subgroup,
additional_modules)

} else {
  plt <- plot_dominant_coex_modules(counts_long, genes_of_interest,
subgroups_of_interest[[subgroup]],
subgroup)
  # convert to gtable to allow for normalizing dimensions in
  # the plot grid
  #plt <- ggplot_gtable(ggplot_build(plt))
}
assign(sprintf('plt%d', i), plt)
i = i + 1
}

# normalize widths of plots
# http://stackoverflow.com/a/19321139/554531
plots <- list(plt1, plt2, plt3, plt4)
grobs <- list()
widths <- list()

for (i in 1:length(plots)){
  grobs[[i]] <- ggplotGrob(plots[[i]])
  widths[[i]] <- grobs[[i]]$widths[2:5]
}

maxwidth <- do.call(grid::unit.pmax, widths)
for (i in 1:length(grobs)){
  grobs[[i]]$widths[2:5] <- as.list(maxwidth)
}

# plot as a 2x2 grid
do.call("grid.arrange", c(grobs, ncol=2))

```

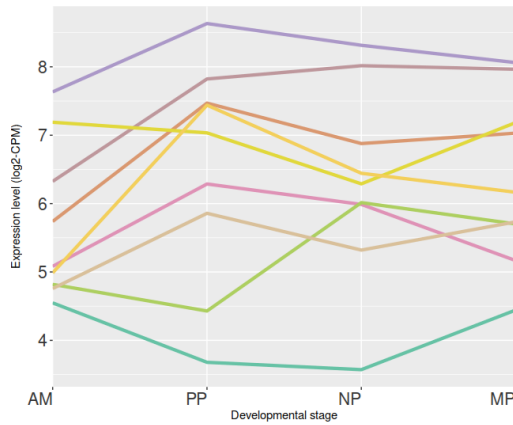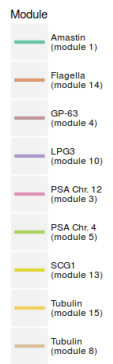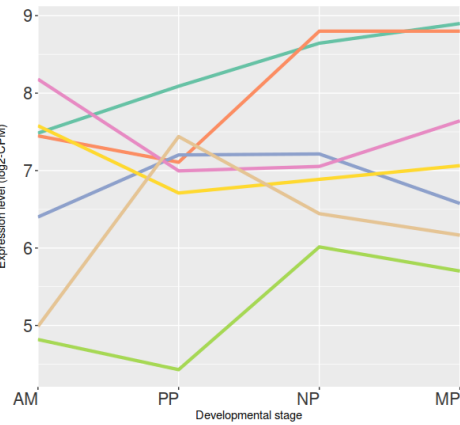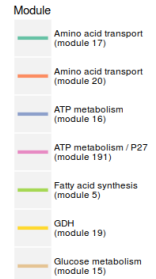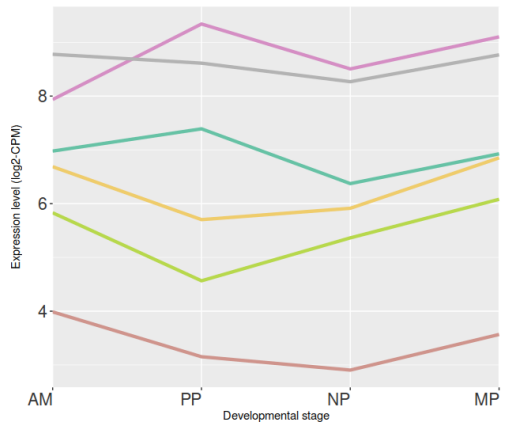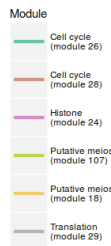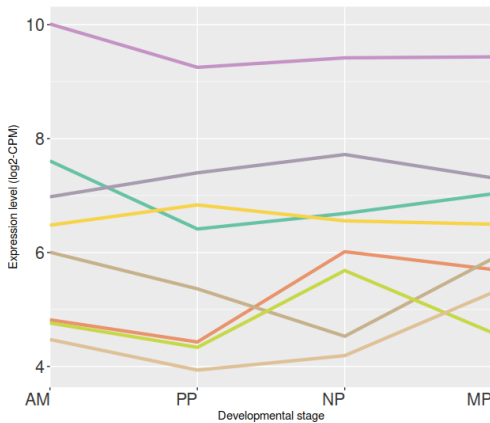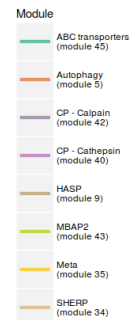

## Enrichment

### GO Enrichment

```
# Create gene lengths vector
gene_ids <- rownames(network_counts$final)

gene_lengths <- gene_info$transcript_length
names(gene_lengths) <- gene_info$gene_id

# Initialize parallelization
cl <- makeCluster(min(12, detectCores() - 1))
registerDoParallel(cl)

# Check each module for enrichment in GO terms and save result in a list
module_go_enrichment <- foreach(color=unique(module_colors), .packages=c('goseq')) %dopar% {
  # Measure GO enrichment for module
  enriched <- tryCatch({
    # module gene ids
    in_module_geneids <- gene_ids[module_colors == color]

    enriched <- test_gene_enrichment(in_module_geneids, gene_ids,
                                     gene_go_mapping, gene_lengths)

    # Add descriptions
    #enriched <- merge(enriched, go_term_id_mapping, by='category')
```

```

}, error=function(e) {
  # goseq fails in some cases; have not been able to track down cause yet
  # to avoid errors we will just return an empty result set
  warning(sprintf("GO enrichment failed for module %s", color))
  cbind(
    get_enrichment_placeholder(),
    term=numeric(0),
    ontology=numeric(0)
  )
})
enriched
}
names(module_go_enrichment) <- unique(module_colors)

# remove any null entries from the results
module_go_enrichment <- module_go_enrichment[!sapply(module_go_enrichment, is.null)]

# unregister cpus
stopCluster(cl)

# Print enrichment results
# TODO: Refactor enrichment results printing logic
tmp <- cbind(gene=gene_ids, color=module_colors)
gene_mapping <- merge(gene_go_mapping, tmp, by='gene')

if (CONFIG$include_tables) {
  print_enrichment_results(module_go_enrichment, module_sizes, 'GO terms',
    go_term_id_mapping, gene_mapping, 'output/modules',
    'go', include_gene_lists=FALSE)
}

```

## 8 enrichment (106 genes)

### Over-represented GO terms:

| category   | adj_pval | num_in_subset | num_total | term                                | ontology |
|------------|----------|---------------|-----------|-------------------------------------|----------|
| GO:0000786 | 0.0282   | 5             | 29        | nucleosome                          | CC       |
| GO:0003924 | 0.0018   | 9             | 86        | GTPase activity                     | MF       |
| GO:0005525 | 0.0282   | 9             | 128       | GTP binding                         | MF       |
| GO:0006334 | 0.0338   | 5             | 33        | nucleosome assembly                 | BP       |
| GO:0043234 | 0.0000   | 8             | 36        | protein complex                     | CC       |
| GO:0046982 | 0.0293   | 5             | 31        | protein heterodimerization activity | MF       |
| GO:0051258 | 0.0000   | 8             | 35        | protein polymerization              | BP       |

## 65 enrichment (21 genes)

### Over-represented GO terms:

| category   | adj_pval | num_in_subset | num_total | term                                                  | ontology |
|------------|----------|---------------|-----------|-------------------------------------------------------|----------|
| GO:0022891 | 0.0088   | 2             | 2         | substrate-specific transmembrane transporter activity | MF       |

**69 enrichment (24 genes)****Over-represented GO terms:**

| category   | adj_pval | num_in_subset | num_total | term                               | ontology |
|------------|----------|---------------|-----------|------------------------------------|----------|
| GO:0003735 | 0e+00    | 19            | 166       | structural constituent of ribosome | MF       |
| GO:0005622 | 0e+00    | 15            | 299       | intracellular                      | CC       |
| GO:0005840 | 0e+00    | 19            | 157       | ribosome                           | CC       |
| GO:0006412 | 0e+00    | 19            | 171       | translation                        | BP       |
| GO:0015935 | 2e-04    | 5             | 16        | small ribosomal subunit            | CC       |

**24 enrichment (46 genes)****Over-represented GO terms:**

| category   | adj_pval | num_in_subset | num_total | term                                | ontology |
|------------|----------|---------------|-----------|-------------------------------------|----------|
| GO:0000786 | 0.0000   | 7             | 29        | nucleosome                          | CC       |
| GO:0003677 | 0.0236   | 7             | 161       | DNA binding                         | MF       |
| GO:0005634 | 0.0057   | 7             | 149       | nucleus                             | CC       |
| GO:0006334 | 0.0000   | 7             | 33        | nucleosome assembly                 | BP       |
| GO:0043234 | 0.0030   | 4             | 36        | protein complex                     | CC       |
| GO:0046982 | 0.0000   | 7             | 31        | protein heterodimerization activity | MF       |
| GO:0051258 | 0.0030   | 4             | 35        | protein polymerization              | BP       |

**98 enrichment (14 genes)****Over-represented GO terms:**

| category   | adj_pval | num_in_subset | num_total | term                                        | ontology |
|------------|----------|---------------|-----------|---------------------------------------------|----------|
| GO:0004812 | 0.0125   | 3             | 24        | aminoacyl-tRNA ligase activity              | MF       |
| GO:0006418 | 0.0125   | 3             | 24        | tRNA aminoacylation for protein translation | BP       |

**14 enrichment (30 genes)****Over-represented GO terms:**

| category   | adj_pval | num_in_subset | num_total | term                   | ontology |
|------------|----------|---------------|-----------|------------------------|----------|
| GO:0003924 | 0.0017   | 6             | 86        | GTPase activity        | MF       |
| GO:0005516 | 0.0000   | 6             | 12        | calmodulin binding     | MF       |
| GO:0005525 | 0.0130   | 6             | 128       | GTP binding            | MF       |
| GO:0031514 | 0.0000   | 6             | 28        | motile cilium          | CC       |
| GO:0043234 | 0.0000   | 6             | 36        | protein complex        | CC       |
| GO:0051258 | 0.0000   | 6             | 35        | protein polymerization | BP       |

**110 enrichment (46 genes)****Over-represented GO terms:**



| category   | adj_pval | num_in_subset | num_total | term                                      | ontology |
|------------|----------|---------------|-----------|-------------------------------------------|----------|
| GO:0004478 | 0.0097   | 2             | 2         | methionine adenosyltransferase activity   | MF       |
| GO:0006556 | 0.0097   | 2             | 2         | S-adenosylmethionine biosynthetic process | BP       |
| GO:0015948 | 0.0097   | 2             | 2         | methanogenesis                            | BP       |

### 113 enrichment (77 genes)

#### Over-represented GO terms:

| category   | adj_pval | num_in_subset | num_total | term        | ontology |
|------------|----------|---------------|-----------|-------------|----------|
| GO:0006412 | 0.0327   | 13            | 171       | translation | BP       |

### 120 enrichment (14 genes)

#### Over-represented GO terms:

| category   | adj_pval | num_in_subset | num_total | term                               | ontology |
|------------|----------|---------------|-----------|------------------------------------|----------|
| GO:0003735 | 0.0027   | 7             | 166       | structural constituent of ribosome | MF       |
| GO:0005840 | 0.0027   | 7             | 157       | ribosome                           | CC       |

### 132 enrichment (27 genes)

#### Over-represented GO terms:

| category   | adj_pval | num_in_subset | num_total | term                               | ontology |
|------------|----------|---------------|-----------|------------------------------------|----------|
| GO:0044267 | 0.0309   | 3             | 12        | cellular protein metabolic process | BP       |

### 30 enrichment (28 genes)

#### Over-represented GO terms:

| category   | adj_pval | num_in_subset | num_total | term                                   | ontology |
|------------|----------|---------------|-----------|----------------------------------------|----------|
| GO:0003746 | 0.037    | 3             | 15        | translation elongation factor activity | MF       |
| GO:0003924 | 0.037    | 5             | 86        | GTPase activity                        | MF       |
| GO:0005525 | 0.037    | 6             | 128       | GTP binding                            | MF       |

### 143 enrichment (53 genes)

#### Over-represented GO terms:

| category   | adj_pval | num_in_subset | num_total | term                                                                | ontology |
|------------|----------|---------------|-----------|---------------------------------------------------------------------|----------|
| GO:0016593 | 0.0495   | 2             | 2         | Cdc73/Paf1 complex                                                  |          |
| GO:0032968 | 0.0495   | 2             | 2         | positive regulation of transcription elongation from RNA polymerase |          |

**148 enrichment (22 genes)****Over-represented GO terms:**

| category   | adj_pval | num_in_subset | num_total | term                               | ontology |
|------------|----------|---------------|-----------|------------------------------------|----------|
| GO:0003735 | 0        | 18            | 166       | structural constituent of ribosome | MF       |
| GO:0005622 | 0        | 15            | 299       | intracellular                      | CC       |
| GO:0005840 | 0        | 17            | 157       | ribosome                           | CC       |
| GO:0006412 | 0        | 18            | 171       | translation                        | BP       |

**149 enrichment (18 genes)****Over-represented GO terms:**

| category   | adj_pval | num_in_subset | num_total | term           | ontology |
|------------|----------|---------------|-----------|----------------|----------|
| GO:0030286 | 0.0054   | 7             | 15        | dynein complex | CC       |

**4 enrichment (21 genes)****Over-represented GO terms:**

| category   | adj_pval | num_in_subset | num_total | term                                                                       | ontology |
|------------|----------|---------------|-----------|----------------------------------------------------------------------------|----------|
| GO:0004198 | 0.0328   | 3             | 23        | calcium-dependent cysteine-type endopeptidase activity                     |          |
| GO:0006508 | 0.0132   | 5             | 91        | proteolysis                                                                |          |
| GO:0007155 | 0.0328   | 2             | 6         | cell adhesion                                                              |          |
| GO:0008160 | 0.0164   | 2             | 4         | protein tyrosine phosphatase activator activity                            |          |
| GO:0042025 | 0.0164   | 2             | 4         | host cell nucleus                                                          |          |
| GO:0044081 | 0.0164   | 2             | 4         | modulation by symbiont of host nitric oxide-mediated signal transduction   |          |
| GO:0075130 | 0.0164   | 2             | 4         | modulation by symbiont of host protein kinase-mediated signal transduction |          |

**150 enrichment (18 genes)****Over-represented GO terms:**

| category   | adj_pval | num_in_subset | num_total | term                               | ontology |
|------------|----------|---------------|-----------|------------------------------------|----------|
| GO:0003735 | 0e+00    | 15            | 166       | structural constituent of ribosome | MF       |
| GO:0005622 | 1e-04    | 11            | 299       | intracellular                      | CC       |
| GO:0005840 | 0e+00    | 15            | 157       | ribosome                           | CC       |
| GO:0006412 | 0e+00    | 14            | 171       | translation                        | BP       |

**29 enrichment (17 genes)****Over-represented GO terms:**

| category   | adj_pval | num_in_subset | num_total | term                               | ontology |
|------------|----------|---------------|-----------|------------------------------------|----------|
| GO:0003735 | 0        | 13            | 166       | structural constituent of ribosome | MF       |
| GO:0005622 | 0        | 12            | 299       | intracellular                      | CC       |
| GO:0005840 | 0        | 13            | 157       | ribosome                           | CC       |
| GO:0006412 | 0        | 11            | 171       | translation                        | BP       |

### 32 enrichment (28 genes)

#### Over-represented GO terms:

| category   | adj_pval | num_in_subset | num_total | term                               | ontology |
|------------|----------|---------------|-----------|------------------------------------|----------|
| GO:0003735 | 0.0000   | 19            | 166       | structural constituent of ribosome | MF       |
| GO:0005622 | 0.0000   | 17            | 299       | intracellular                      | CC       |
| GO:0005840 | 0.0000   | 17            | 157       | ribosome                           | CC       |
| GO:0006412 | 0.0000   | 18            | 171       | translation                        | BP       |
| GO:0015934 | 0.0051   | 3             | 10        | large ribosomal subunit            | CC       |

### 15 enrichment (29 genes)

#### Over-represented GO terms:

| category   | adj_pval | num_in_subset | num_total | term                   | ontology |
|------------|----------|---------------|-----------|------------------------|----------|
| GO:0003924 | 0.0005   | 6             | 86        | GTPase activity        | MF       |
| GO:0005525 | 0.0038   | 6             | 128       | GTP binding            | MF       |
| GO:0043234 | 0.0000   | 6             | 36        | protein complex        | CC       |
| GO:0051258 | 0.0000   | 6             | 35        | protein polymerization | BP       |

### 172 enrichment (10 genes)

#### Over-represented GO terms:

| category   | adj_pval | num_in_subset | num_total | term                                 | ontology |
|------------|----------|---------------|-----------|--------------------------------------|----------|
| GO:0004197 | 0.0250   | 2             | 7         | cysteine-type endopeptidase activity | MF       |
| GO:0004519 | 0.0009   | 3             | 15        | endonuclease activity                | MF       |
| GO:0006308 | 0.0004   | 3             | 9         | DNA catabolic process                | BP       |

### 16 enrichment (25 genes)

#### Over-represented GO terms:

| category   | adj_pval | num_in_subset | num_total | term                                                              | ontology |
|------------|----------|---------------|-----------|-------------------------------------------------------------------|----------|
| GO:0000275 | 0.0468   | 2             | 4         | mitochondrial proton-transporting ATP synthase complex, catalytic |          |
| GO:0004252 | 0.0468   | 2             | 5         | serine-type endopeptidase activity                                |          |
| GO:0015991 | 0.0468   | 3             | 23        | ATP hydrolysis coupled proton transport                           |          |
| GO:0046034 | 0.0468   | 2             | 4         | ATP metabolic process                                             |          |
| GO:0070012 | 0.0298   | 2             | 2         | oligopeptidase activity                                           |          |

### 17 enrichment (53 genes)

#### Over-represented GO terms:

| category   | adj_pval | num_in_subset | num_total | term                                         | ontology |
|------------|----------|---------------|-----------|----------------------------------------------|----------|
| GO:0002036 | 0.0001   | 3             | 3         | regulation of L-glutamate transport          | BP       |
| GO:0005353 | 0.0001   | 3             | 3         | fructose transmembrane transporter activity  | MF       |
| GO:0005354 | 0.0001   | 3             | 3         | galactose transmembrane transporter activity | MF       |

| category   | adj_pval | num_in_subset | num_total | term                                         | ontology |
|------------|----------|---------------|-----------|----------------------------------------------|----------|
| GO:0005886 | 0.0007   | 4             | 15        | plasma membrane                              | CC       |
| GO:0006971 | 0.0001   | 3             | 4         | hypotonic response                           | BP       |
| GO:0009190 | 0.0015   | 4             | 12        | cyclic nucleotide biosynthetic process       | BP       |
| GO:0015193 | 0.0001   | 3             | 3         | L-proline transmembrane transporter activity | MF       |
| GO:0015238 | 0.0015   | 3             | 7         | drug transmembrane transporter activity      | MF       |
| GO:0015578 | 0.0001   | 3             | 3         | mannose transmembrane transporter activity   | MF       |
| GO:0015591 | 0.0046   | 2             | 2         | D-ribose transmembrane transporter activity  | MF       |
| GO:0015752 | 0.0046   | 2             | 2         | D-ribose transport                           | BP       |
| GO:0015758 | 0.0001   | 3             | 3         | glucose transport                            | BP       |
| GO:0015893 | 0.0001   | 3             | 3         | drug transport                               | BP       |
| GO:0016849 | 0.0015   | 4             | 12        | phosphorus-oxygen lyase activity             | MF       |
| GO:0022857 | 0.0012   | 3             | 6         | transmembrane transporter activity           | MF       |
| GO:0022858 | 0.0001   | 3             | 3         | alanine transmembrane transporter activity   | MF       |
| GO:0035524 | 0.0001   | 3             | 3         | proline transmembrane transport              | BP       |
| GO:0035556 | 0.0046   | 4             | 19        | intracellular signal transduction            | BP       |
| GO:0051955 | 0.0001   | 3             | 3         | regulation of amino acid transport           | BP       |
| GO:0055056 | 0.0046   | 2             | 2         | D-glucose transmembrane transporter activity | MF       |
| GO:0070258 | 0.0046   | 2             | 2         | inner membrane complex                       | CC       |
| GO:0070881 | 0.0001   | 3             | 3         | regulation of proline transport              | BP       |
| GO:0080144 | 0.0001   | 3             | 3         | amino acid homeostasis                       | BP       |

#### 40 enrichment (23 genes)

##### Over-represented GO terms:

| category   | adj_pval | num_in_subset | num_total | term                             | ontology |
|------------|----------|---------------|-----------|----------------------------------|----------|
| GO:0006950 | 0.0030   | 3             | 21        | response to stress               | BP       |
| GO:0008234 | 0.0014   | 3             | 13        | cysteine-type peptidase activity | MF       |
| GO:0016209 | 0.0002   | 3             | 8         | antioxidant activity             | MF       |
| GO:0051082 | 0.0388   | 3             | 53        | unfolded protein binding         | MF       |
| GO:0051920 | 0.0002   | 3             | 8         | peroxiredoxin activity           | MF       |

#### 207 enrichment (10 genes)

##### Over-represented GO terms:

| category   | adj_pval | num_in_subset | num_total | term                               | ontology |
|------------|----------|---------------|-----------|------------------------------------|----------|
| GO:0003735 | 0.0000   | 8             | 166       | structural constituent of ribosome | MF       |
| GO:0005622 | 0.0299   | 6             | 299       | intracellular                      | CC       |
| GO:0005840 | 0.0000   | 9             | 157       | ribosome                           | CC       |
| GO:0006412 | 0.0000   | 8             | 171       | translation                        | BP       |
| GO:0032465 | 0.0073   | 2             | 3         | regulation of cytokinesis          | BP       |

#### Total enriched GO terms

Total: 110 (Mean adjusted pval=0.009336)

```
enriched_colors_go <- get_enriched_modules(module_go_enrichment)
# save results
```

```
COEXPRESSION_NETWORK_RESULT$enriched_colors_go <- enriched_colors_go
COEXPRESSION_NETWORK_RESULT$module_go_enrichment <- module_go_enrichment
COEXPRESSION_NETWORK_RESULT$go_term_id_mapping <- go_term_id_mapping
```

## KEGG Enrichment

```
# Check each module for enrichment in KEGG terms and save result in a list
cl <- makeCluster(min(12, detectCores() - 1))
registerDoParallel(cl)

# Check each module for enrichment in GO terms and save result in a list
module_kegg_enrichment <- foreach(color=unique(module_colors), .packages=c('goseq')) %dopar% {
  # Measure KEGG enrichment for module
  enriched <- tryCatch({
    in_module_geneids <- gene_ids[module_colors == color]
    enriched <- test_gene_enrichment(in_module_geneids, gene_ids,
                                     gene_kegg_mapping, gene_lengths)
    enriched <- unique(merge(enriched, kegg_pathways[,c('category','name')],
                             by='category'))
  }, error=function(e) {
    # goseq fails in some cases; have not been able to track down cause yet
    warning(sprintf("KEGG enrichment failed for module %s", color))
    return(get_enrichment_placeholder())
  })
  enriched
}

names(module_kegg_enrichment) <- unique(module_colors)

# remove any null entries from the results
module_kegg_enrichment <- module_kegg_enrichment[!sapply(module_kegg_enrichment, is.null)]

# unregister cpus
stopCluster(cl)

if (CONFIG$include_tables) {
  print_enrichment_results(module_kegg_enrichment, module_sizes, 'KEGG pathway',
                           kegg_pathways %>% select(-description),
                           'output/modules', 'kegg')
}
```

8 enrichment (106 genes)

Over-represented KEGG pathway:

| category      | adj_pval | num_in_subset | num_total | name      | class                                        |
|---------------|----------|---------------|-----------|-----------|----------------------------------------------|
| path:lma04145 | 5e-04    | 8             | 61        | Phagosome | Cellular Processes; Transport and catabolism |

69 enrichment (24 genes)

Over-represented KEGG pathway:

| category      | adj_pval | num_in_subset | num_total | name     | class                                       |
|---------------|----------|---------------|-----------|----------|---------------------------------------------|
| path:lma03010 | 0        | 24            | 169       | Ribosome | Genetic Information Processing; Translation |

**Under-represented KEGG pathway:**

| category      | adj_pval | num_in_subset | num_total | name               | class |
|---------------|----------|---------------|-----------|--------------------|-------|
| path:lma01100 | 0.0139   | 0             | 426       | Metabolic pathways |       |

**70 enrichment (33 genes)**

**Over-represented KEGG pathway:**

| category      | adj_pval | num_in_subset | num_total | name     | class                                       |
|---------------|----------|---------------|-----------|----------|---------------------------------------------|
| path:lma03010 | 0.0446   | 4             | 169       | Ribosome | Genetic Information Processing; Translation |

**72 enrichment (154 genes)**

**Over-represented KEGG pathway:**

| category      | adj_pval | num_in_subset | num_total | name                                                  | class |
|---------------|----------|---------------|-----------|-------------------------------------------------------|-------|
| path:lma00563 | 0.0092   | 3             | 8         | Glycosylphosphatidylinositol(GPI)-anchor biosynthesis | Meta  |

**24 enrichment (46 genes)**

**Over-represented KEGG pathway:**

| category      | adj_pval | num_in_subset | num_total | name      | class                                        |
|---------------|----------|---------------|-----------|-----------|----------------------------------------------|
| path:lma04145 | 0.035    | 4             | 61        | Phagosome | Cellular Processes; Transport and catabolism |

**98 enrichment (14 genes)**

**Over-represented KEGG pathway:**

| category      | adj_pval | num_in_subset | num_total | name                        | class                          |
|---------------|----------|---------------|-----------|-----------------------------|--------------------------------|
| path:lma00970 | 0.0113   | 3             | 28        | Aminoacyl-tRNA biosynthesis | Genetic Information Processing |

**14 enrichment (30 genes)**

**Over-represented KEGG pathway:**

| category      | adj_pval | num_in_subset | num_total | name      | class                                        |
|---------------|----------|---------------|-----------|-----------|----------------------------------------------|
| path:lma04145 | 0        | 6             | 61        | Phagosome | Cellular Processes; Transport and catabolism |

**39 enrichment (103 genes)**

**Over-represented KEGG pathway:**

| category      | adj_pval | num_in_subset | num_total | name          | class                                       |
|---------------|----------|---------------|-----------|---------------|---------------------------------------------|
| path:lma03013 | 0.0335   | 5             | 49        | RNA transport | Genetic Information Processing; Translation |

**113 enrichment (77 genes)**

**Over-represented KEGG pathway:**

| category      | adj_pval | num_in_subset | num_total | name     | class                                       |
|---------------|----------|---------------|-----------|----------|---------------------------------------------|
| path:lma03010 | 1e-04    | 17            | 169       | Ribosome | Genetic Information Processing; Translation |

**120 enrichment (14 genes)**

**Over-represented KEGG pathway:**

| category      | adj_pval | num_in_subset | num_total | name     | class                                       |
|---------------|----------|---------------|-----------|----------|---------------------------------------------|
| path:lma03010 | 0.0073   | 7             | 169       | Ribosome | Genetic Information Processing; Translation |

**145 enrichment (34 genes)**

**Over-represented KEGG pathway:**

| category      | adj_pval | num_in_subset | num_total | name                                | class                    |
|---------------|----------|---------------|-----------|-------------------------------------|--------------------------|
| path:lma00051 | 0.0124   | 3             | 13        | Fructose and mannose metabolism     | Metabolism; Carbohydrate |
| path:lma00524 | 0.0124   | 2             | 3         | Butirosin and neomycin biosynthesis | Metabolism; Biosynthesis |

**148 enrichment (22 genes)**

**Over-represented KEGG pathway:**

| category      | adj_pval | num_in_subset | num_total | name     | class                                       |
|---------------|----------|---------------|-----------|----------|---------------------------------------------|
| path:lma03010 | 0        | 21            | 169       | Ribosome | Genetic Information Processing; Translation |

**Under-represented KEGG pathway:**

| category      | adj_pval | num_in_subset | num_total | name               | class |
|---------------|----------|---------------|-----------|--------------------|-------|
| path:lma01100 | 0.0205   | 0             | 426       | Metabolic pathways |       |

**150 enrichment (18 genes)**

**Over-represented KEGG pathway:**

| category      | adj_pval | num_in_subset | num_total | name     | class                                       |
|---------------|----------|---------------|-----------|----------|---------------------------------------------|
| path:lma03010 | 0        | 16            | 169       | Ribosome | Genetic Information Processing; Translation |

**29 enrichment (17 genes)****Over-represented KEGG pathway:**

| category      | adj_pval | num_in_subset | num_total | name     | class                                       |
|---------------|----------|---------------|-----------|----------|---------------------------------------------|
| path:lma03010 | 0        | 13            | 169       | Ribosome | Genetic Information Processing; Translation |

**32 enrichment (28 genes)****Over-represented KEGG pathway:**

| category      | adj_pval | num_in_subset | num_total | name     | class                                       |
|---------------|----------|---------------|-----------|----------|---------------------------------------------|
| path:lma03010 | 0        | 22            | 169       | Ribosome | Genetic Information Processing; Translation |

**Under-represented KEGG pathway:**

| category      | adj_pval | num_in_subset | num_total | name               | class |
|---------------|----------|---------------|-----------|--------------------|-------|
| path:lma01100 | 0.0026   | 0             | 426       | Metabolic pathways |       |

**15 enrichment (29 genes)****Over-represented KEGG pathway:**

| category      | adj_pval | num_in_subset | num_total | name                         | class                           |
|---------------|----------|---------------|-----------|------------------------------|---------------------------------|
| path:lma00010 | 0.0384   | 4             | 39        | Glycolysis / Gluconeogenesis | Metabolism; Carbohydrate met    |
| path:lma04145 | 0.0019   | 6             | 61        | Phagosome                    | Cellular Processes; Transport a |

**23 enrichment (79 genes)****Over-represented KEGG pathway:**

| category      | adj_pval | num_in_subset | num_total | name      | class                                        |
|---------------|----------|---------------|-----------|-----------|----------------------------------------------|
| path:lma04145 | 0.0083   | 4             | 61        | Phagosome | Cellular Processes; Transport and catabolism |

**172 enrichment (10 genes)****Over-represented KEGG pathway:**

| category      | adj_pval | num_in_subset | num_total | name          | class                               |
|---------------|----------|---------------|-----------|---------------|-------------------------------------|
| path:lma05140 | 0.0268   | 2             | 19        | Leishmaniasis | Human Diseases; Infectious diseases |

**40 enrichment (23 genes)****Over-represented KEGG pathway:**



| category      | adj_pval | num_in_subset | num_total | name                   | class                             |
|---------------|----------|---------------|-----------|------------------------|-----------------------------------|
| path:lma00480 | 0.0222   | 3             | 28        | Glutathione metabolism | Metabolism; Metabolism of other a |

## 207 enrichment (10 genes)

### Over-represented KEGG pathway:

| category      | adj_pval | num_in_subset | num_total | name     | class                                       |
|---------------|----------|---------------|-----------|----------|---------------------------------------------|
| path:lma03010 | 3e-04    | 8             | 169       | Ribosome | Genetic Information Processing; Translation |

### Total enriched KEGG pathway

Total: 25 (Mean adjusted pval=0.012046)

```
enriched_colors_kegg <- get_enriched_modules(module_kegg_enrichment)

# save results
COEXPRESSION_NETWORK_RESULT$enriched_colors_kegg <- enriched_colors_kegg
COEXPRESSION_NETWORK_RESULT$module_kegg_enrichment <- module_kegg_enrichment
COEXPRESSION_NETWORK_RESULT$kegg_pathways <- kegg_pathways

go_enrichment_status <- as.numeric(module_colors %in% enriched_colors_go)
kegg_enrichment_status <- as.numeric(module_colors %in% enriched_colors_kegg)
```

### LeishCyc enrichment

```
# load data (source: http://www.biocyc.org/LEISH/organism-summary?object=LEISH)
leishcyc_infile <- file.path(Sys.getenv('REF'), 'lmajor_friedlin', 'annotation',
                             'LeishCyc_19.5_mapping.csv')

# load full LeishCyc mapping
leishcyc_mapping <- read.csv(leishcyc_infile)
colnames(leishcyc_mapping) <- c('category', 'gene_id')

# Initialize CPUs
cl <- makeCluster(min(12, detectCores() - 1))
registerDoParallel(cl)

# Check each module for pathway enrichment and save result in a list
leishcyc_pathway_enrichment <- foreach(color=unique(module_colors), .packages=c('goseq')) %dopar% {
  # Measure enrichment for module
  enriched <- tryCatch({
    in_module_geneids <- gene_ids[module_colors == color]
    enriched <- test_gene_enrichment(in_module_geneids, gene_ids,
                                     leishcyc_mapping, gene_lengths)
  }, error=function(e) {
    # goseq fails in some cases; have not been able to track down cause yet
    # Note: goseq will also fail if supplied with a dplyr tbl_df so first
    # make sure that is not the case
    warning(sprintf("LeishCyc enrichment failed for module %s", color))
    return(get_enrichment_placeholder())
  })
}
```

```

    enriched
  }
  names(leishcyc_pathway_enrichment) <- unique(module_colors)

  # remove any null entries from the results
  leishcyc_pathway_enrichment <- leishcyc_pathway_enrichment[!sapply(leishcyc_pathway_enrichment, is.null)]

  # unregister cpus
  stopCluster(cl)

if (CONFIG$include_tables) {
  print_enrichment_results(leishcyc_pathway_enrichment, module_sizes, 'LeishCyc
                          Pathway', output_dir='output/modules',
                          enrichment_type='leishcyc')
}

```

### 110 enrichment (46 genes)

#### Over-represented LeishCyc Pathway:

|     | category                                   | adj_pval | num_in_subset | num_total |
|-----|--------------------------------------------|----------|---------------|-----------|
| 106 | S-adenosyl-L-methionine biosynthesis       | 0.0043   | 2             | 2         |
| 73  | methionine degradation I (to homocysteine) | 0.0063   | 2             | 3         |
| 65  | S-adenosyl-L-methionine cycle              | 0.0174   | 2             | 6         |
| 74  | methionine salvage pathway                 | 0.0304   | 2             | 8         |

### 15 enrichment (29 genes)

#### Over-represented LeishCyc Pathway:

|     | category                                  | adj_pval | num_in_subset | num_total |
|-----|-------------------------------------------|----------|---------------|-----------|
| 119 | superpathway of central carbon metabolism | 0.0056   | 5             | 62        |

### 40 enrichment (23 genes)

#### Over-represented LeishCyc Pathway:

|     | category                      | adj_pval | num_in_subset | num_total |
|-----|-------------------------------|----------|---------------|-----------|
| 138 | trypanothione redox reactions | 7e-04    | 3             | 11        |

### 194 enrichment (27 genes)

#### Over-represented LeishCyc Pathway:

|    | category                                     | adj_pval | num_in_subset | num_total |
|----|----------------------------------------------|----------|---------------|-----------|
| 40 | GDP-arabinose biosynthesis                   | 0.0071   | 2             | 2         |
| 41 | GDP-L-fucose biosynthesis II (from L-fucose) | 0.0071   | 2             | 2         |

## Total enriched LeishCyc

Pathway

Total: 8 (Mean adjusted pval=0.009882)

```
# temporarily recreate correlation matrix to compute module stats
correlation_matrix <- cor(t(wgcna_input))
module_stats <- create_module_stats_df(result, correlation_matrix, wgcna_input,
                                       main_contrast)

# free up memory
rm(correlation_matrix)
gc()

if ('description' %in% colnames(result)) {
  sorted_result <- tbl_df(result[with(result, order(color, description)),])
} else {
  sorted_result <- tbl_df(result[with(result, order(color)),])
}

# Also save a simplified version of the table for display in the HTML output
simple_result <- sorted_result

# Write out a csv file to be used as a node table input in cytoscape.
write.table(sorted_result,
            file.path(output_dir, "output", "network-annotation-full.tab"),
            row.names=FALSE, quote=FALSE, sep="\t")

# Also save a simplified version of the table for display in the HTML output
write.table(simple_result,
            file.path(output_dir, "output", "network-annotation.tab"),
            row.names=FALSE, quote=FALSE, sep="\t")

# Save dendrogram and module information
save(gene_tree, file=file.path(outdir, 'gene_tree.RData'))
save(module_colors, file=file.path(outdir, 'module_colors.RData'))

# Save GO/KEGG network module enrichment results
save(module_go_enrichment,
      file=file.path(outdir, 'module_go_enrichment.RData'))

save(module_kegg_enrichment,
      file=file.path(outdir, 'module_kegg_enrichment.RData'))

write.csv(combined_counts_table,
          file.path(output_dir, "output", "combined_counts.csv"),
          row.names=FALSE, quote=FALSE)

# Write out a csv file to be used as a node table input in cytoscape.
write.table(sorted_result,
            file.path(output_dir, "output", "network-annotation-full.tab"),
            row.names=FALSE, quote=FALSE, sep="\t")

write.table(simple_result,
            file.path(output_dir, "output", "network-annotation.tab"),
```

```

        row.names=FALSE, quote=FALSE, sep="\t")

# save individual module information
for (mod_color in module_colors) {
  # module genes
  module_genes <- result %>% filter(color==mod_color)
  write.table(module_genes,
              file.path(module_output_dir, sprintf("%s_genes.txt", mod_color)),
              row.names=FALSE, quote=FALSE, sep="\t")
}

# Save enrichment results as text files
output_module_enrichment_results(module_go_enrichment, module_output_dir,
                                 'go', go_term_id_mapping)
output_module_enrichment_results(module_kegg_enrichment, module_output_dir,
                                 'kegg', kegg_pathways %>% select(-description))

if (CONFIG$target == "pathogen" && CONFIG$pathogen == "L. major") {
  output_module_enrichment_results(leishcyc_pathway_enrichment,
                                   module_output_dir, 'leishcyc')
}

# Write module stats to a file
write.csv(module_stats, file.path(output_dir, "output", "module_stats.csv"),
          row.names=FALSE, quote=FALSE)

```

## Data Preparation

This document describes the steps used for co-expression cluster analysis. It begins with a raw count-table generated using HTSeq. The commands used to go from the raw RNA-Seq reads to a count table are described below. Filepaths containing 69XX are used representative sample names. In each such case, the commands should be run separately for each sample (e.g. 6961).

### Read trimming

Trimmomatic v0.32 [Bolger\_2014] was used to remove adaptor sequence from reads and trim low-quality bases from the ends of reads:

```

java -jar trimmomatic.jar PE -phred33      \
69XX_R1_filtered.fastq                   \
69XX_R2_filtered.fastq                   \
69XX_R1_filtered_adaptertrim.fastq tmp1 \
69XX_R2_filtered_adaptertrim.fastq tmp2 \
ILLUMINACLIP:TruSeq_both.fa:2:30:10     \
LEADING:20 TRAILING:20                   \
MINLEN:36

```

### Sample quality check

FastQC v0.11.2 was then run to check the quality of the of the untrimmed and trimmed reads:

```
fastqc *_R1_filtered.fastq -o 69XX/QC/
fastqc *_R1_filtered_adaptertrim.fastq -o 69XX/QC/
```

## Read mapping

Next, each sample was mapped to the TriTrypDB [Aslett\_2009] *L. major* Friedlin reference genome (v6.0) using TopHat v2.0.13 [Kim\_2013] (bowtie version 2.2.4).

```
tophat -o 69XX_tophat \
  -g 1 -G TriTrypDB-6.0_LmajorFriedlin.gff \
  --no-novel-juncs TriTrypDB-6.0_LmajorFriedlin_Genome \
  69XX_R1_filtered_adaptertrim.fastq \
  69XX_R2_filtered_adaptertrim.fastq
```

Reads were then sorted by read name using samtools v1.3 [Li\_2009]:

```
samtools sort -n 69XX_tophat/accepted_hits.bam \
  -o 69XX_tophat/accepted_hits_sorted.bam
```

## Read counting

Next, HTSeq v0.6.0 [Anders\_2014] was used to quantify expression at the exon level:

```
samtools view 69XX_tophat/accepted_hits_sorted.bam | \
  htseq-count -s no -i ID -\
  TriTrypDB-6.0_LmajorFriedlin.gff >\
  htseq_69XX.txt
```

Finally, sample-specific count tables were merged together to form a single comma-separated count table, which was used as input for differential expression and co-expression clustering analysis.

## Reproducing this analysis

This PDF was created using the knitr and rmarkdown packages for R.

To recreate this PDF starting from the original RNA-Seq count tables, begin by using the `biocLite()` function to install the following dependencies:

- goseq
- gplots
- ggplot2
- GO.db
- RColorBrewer
- genomeIntervals
- dplyr
- limma
- preprocessCore
- venneuler
- knitr
- rmarkdown
- knitcitations

Further, you will also need to download and install the following *L. major* Friedlin annotation packages.

- Leishmania.major.Friedlin

- `org.LmjF.tritryp.db`
- `TxDb.LmajorFriedlin.tritryp27.genes`

The devtools `install_github()` function can be used for achieve this.

Next, open up an R console in the directory containing `XXX.Rmd`, and run:

```
library('rmarkdown')
render('XXX.Rmd', output_format='pdf_document')
```

Note that you can also generate an HTML version of the output by switching `pdf_document` for `html_document` in the function call above.

If all of the dependencies specified above are properly installed, and the versions are not significantly different from those used at the time of writing this manuscript, then you should be able to regenerate all of the tables and figures in the PDF as they appear below.

To find out which specific library versions were used, refer to the “System Information” section at the bottom of this document.

The code used in this analyses has been adopted from a more general set of R and Rmarkdown code which can be found at:

- [github.com/elsayed-lab/manuscript-shared-rnaseq](https://github.com/elsayed-lab/manuscript-shared-rnaseq)

## References

1. Allaire, J.J., Cheng, J., Xie, Y., McPherson, J., Chang, W., Allen, J., Wickham, H., Atkins, A. and Hyndman, R. (2016) `rmarkdown`: Dynamic Documents for R.
2. Huber, W., Carey, V.J., Gentleman, R., Anders, S., Carlson, M., Carvalho, B.S., Bravo, H.C., Davis, S., Gatto, L., Girke, T., Gottardo, R., Hahne, F., Hansen, K.D., Irizarry, R.A., Lawrence, M., et al. (2015) Orchestrating high-throughput genomic analysis with Bioconductor. *Nat. Methods*, 12, 115–21.
3. Xie, Y. (2015) *Dynamic Documents with {R} and knitr* 2nd ed. Chapman and Hall/CRC, Boca Raton, Florida.
4. Ritchie, M.E., Phipson, B., Wu, D., Hu, Y., Law, C.W., Shi, W. and Smyth, G.K. (2015) `limma` powers differential expression analyses for RNA-sequencing and microarray studies. 43.
5. Kim, D., Pertea, G., Trapnell, C., Pimentel, H., Kelley, R. and Salzberg, S.L. (2013) TopHat2: accurate alignment of transcriptomes in the presence of insertions, deletions and gene fusions. *Genome Biol.*, 14, R36.
6. Gentleman, R.C., Carey, V.J., Bates, D.M., Bolstad, B., Dettling, M., Dudoit, S., Ellis, B., Gautier, L., Ge, Y., Gentry, J., Hornik, K., Hothorn, T., Huber, W., Iacus, S., Irizarry, R., et al. (2004) Bioconductor: open software development for computational biology and bioinformatics. *Genome Biol.*, 5, R80.
7. Anders, S., Pyl, P.T. and Huber, W. (2014) HTSeq - A Python framework to work with high-throughput sequencing data. *Bioinformatics*, 10.1093/bioinformatics/btu638.
8. Kanehisa, M. and Goto, S. (2000) KEGG: kyoto encyclopedia of genes and genomes. *Nucleic Acids Res.*, 28, 27–30.
9. Ashburner, M., Ball, C.A., Blake, J.A., Botstein, D., Butler, H., Cherry, J.M., Davis, A.P., Dolinski, K., Dwight, S.S., Eppig, J.T., Harris, M.A., Hill, D.P., Issel-Tarver, L., Kasarskis, A., Lewis, S., et al. (2000) Gene ontology: tool for the unification of biology. The Gene Ontology Consortium. *Nat. Genet.*, 25, 25–9.
10. Andrews, S. (2010) FastQC: A quality control tool for high throughput sequence data. <http://www.bioinformatics.babraham.ac.uk/projects/fastqc/>.
11. Smyth, G.K. (2000) *Bioinformatics and Computational Biology Solutions Using R and Bioconductor*, In Gentleman, R., Carey, V.J., Huber, W., Irizarry, R.A., Dudoit, S. (eds), *Solutions, Statistics for Biology and Health*. Springer-Verlag, New York, Vol. 1, pp. 9–10.

12. Gilson,P.R., Nebl,T., Vukcevic,D., Moritz,R.L., Sargeant,T., Speed,T.P., Schofield,L. and Crabb,B.S. (2006) Identification and stoichiometry of glycosylphosphatidylinositol-anchored membrane proteins of the human malaria parasite *Plasmodium falciparum*. *Mol. Cell. Proteomics*, 5, 1286–99.
13. Sonnhammer,E.L., von Heijne,G. and Krogh,A. (1998) A hidden Markov model for predicting transmembrane helices in protein sequences. *Proc. Int. Conf. Intell. Syst. Mol. Biol.*, 6, 175–82.
14. Doyle,M. a, MacRae,J.I., De Souza,D.P., Saunders,E.C., McConville,M.J. and Likić,V. a (2009) Leish-Cyc: a biochemical pathways database for *Leishmania major*. *BMC Syst. Biol.*, 3, 57.
15. Bolger,A.M., Lohse,M. and Usadel,B. (2014) Trimmomatic: a flexible trimmer for Illumina sequence data. *Bioinformatics*, 30, 2114–2120.
16. Petersen,T.N., Brunak,S., von Heijne,G. and Nielsen,H. (2011) SignalP 4.0: discriminating signal peptides from transmembrane regions. *Nat. Methods*, 8, 785–6.
17. Law,C.W., Chen,Y., Shi,W. and Smyth,G.K. (2014) Voom: precision weights unlock linear model analysis tools for RNA-seq read counts. *Genome Biol.*, 15, R29.
18. Hong,G., Zhang,W., Li,H., Shen,X. and Guo,Z. (2014) Separate enrichment analysis of pathways for up- and downregulated genes. *J. R. Soc. Interface*, 11, 20130950.
19. Bolstad,B.M., Irizarry,R., Astrand,M. and Speed,T.P. (2003) A comparison of normalization methods for high density oligonucleotide array data based on variance and bias. *Bioinformatics*, 19, 185–193.
20. Zhang,B. and Horvath,S. (2005) A general framework for weighted gene co-expression network analysis. *Stat. Appl. Genet. Mol. Biol.*, 4, Article17.
21. Young,M.D., Wakefield,M.J., Smyth,G.K. and Oshlack,A. (2010) Gene ontology analysis for RNA-seq: accounting for selection bias. *Genome Biol.*, 11, R14.
22. Aslett,M., Aurrecochea,C., Berriman,M., Brestelli,J., Brunk,B.P., Carrington,M., Depledge,D.P., Fischer,S., Gajria,B., Gao,X., Gardner,M.J., Gingle,A., Grant,G., Harb,O.S., Heiges,M., et al. (2010) TriTrypDB: a functional genomic resource for the Trypanosomatidae. *Nucleic Acids Res.*, 38, D457–62.

## System Information

```
if (opts_knit$get("rmarkdown.pandoc.to") == 'latex') {
  toLatex(sessionInfo())
} else {
  library('pander')
  pander(sessionInfo())
}
```

- R version 3.3.2 (2016-10-31), x86\_64-pc-linux-gnu
- Locale: LC\_CTYPE=en\_US.UTF-8, LC\_NUMERIC=C, LC\_TIME=en\_US.UTF-8, LC\_COLLATE=en\_US.UTF-8, LC\_MONETARY=en\_US.UTF-8, LC\_MESSAGES=en\_US.UTF-8, LC\_PAPER=en\_US.UTF-8, LC\_NAME=C, LC\_ADDRESS=C, LC\_TELEPHONE=C, LC\_MEASUREMENT=en\_US.UTF-8, LC\_IDENTIFICATION=C
- Base packages: base, datasets, graphics, grDevices, methods, parallel, stats, stats4, tools, utils
- Other packages: AnnotationDbi 1.34.4, BiasedUrn 1.07, Biobase 2.32.0, BiocGenerics 0.18.0, biomaRt 2.28.0, bitops 1.0-6, colorout 1.1-1, doParallel 1.0.10, dplyr 0.5.0, dynamicTreeCut 1.63-1, fastcluster 1.1.22, flashClust 1.01-2, foreach 1.4.3, geneLenDataBase 1.8.0, GenomeInfoDb 1.8.7, GenomicFeatures 1.24.5, GenomicRanges 1.24.3, ggplot2 2.2.0, GO.db 3.3.0, goseq 1.24.0, gplots 3.0.1, gridExtra 2.2.1, hpgltools 2016.02, IRanges 2.6.1, iterators 1.0.8, knitcitations 1.0.7.1, knitr 1.15.1, Leishmania.major.Friedlin 28.0, limma 3.28.21, Matrix 1.2-7.1, nvimcom 0.9-25, OrganismDbi 1.14.1, org.LmjF.tritryp.db 28.0, preprocessCore 1.34.0, RColorBrewer 1.1-2, RCurl 1.95-4.8, readr 1.0.0, reshape2 1.4.2, rmarkdown 1.2, rtracklayer 1.32.2, S4Vectors 0.10.3, TxDb.LmajorFriedlin.tritryp28.genes 28.0, WGCNA 1.51
- Loaded via a namespace (and not attached): acepack 1.4.1, assertthat 0.1, backports 1.0.4, base64 2.0, bibtext 0.4.0, BiocInstaller 1.22.3, BiocParallel 1.6.6, Biostrings 2.40.2, caTools 1.17.1,

cluster 2.0.5, codetools 0.2-15, colorspace 1.3-1, data.table 1.10.0, DBI 0.5-1, digest 0.6.10, evaluate 0.10, foreign 0.8-67, Formula 1.2-1, gdata 2.17.0, GenomicAlignments 1.8.4, graph 1.50.0, grid 3.3.2, gtable 0.2.0, gtools 3.5.0, highr 0.6, Hmisc 4.0-1, htmlTable 1.7, htmltools 0.3.5, httr 1.2.1, impute 1.46.0, KernSmooth 2.23-15, labeling 0.3, lattice 0.20-34, latticeExtra 0.6-28, lazyeval 0.2.0, lubridate 1.6.0, magrittr 1.5, matrixStats 0.51.0, memoise 1.0.0, mgcv 1.8-15, munsell 0.4.3, nlme 3.1-128, nnet 7.3-12, openssl 0.9.5, plyr 1.8.4, R6 2.2.0, RBGL 1.48.1, Rcpp 0.12.8, RefManageR 0.13.1, RJSONIO 1.3-0, rpart 4.1-10, rprojroot 1.1, Rsamtools 1.24.0, RSQLite 1.1, scales 0.4.1, splines 3.3.2, stringi 1.1.2, stringr 1.1.0, SummarizedExperiment 1.2.3, survival 2.40-1, tibble 1.2, XML 3.98-1.5, XVector 0.12.1, yaml 2.1.14, zlibbioc 1.18.0
