# Supplementary material for: The Transcriptome of Leishmania major Developmental Stages in Their Natural Sand Fly Vector
Source: PubMed Central journal article supplement (PMC5380837; doi:10.1128/mbio.00029-17), 2017-04-04
Supplement: mbo002173254sd2.pdf [file mbo002173254sd2.pdf]

A. Enrichment of GO categories, downregulated in PP vs. AM (5 categories)

| Category   | Adj pval <sup>a</sup> | Num in subset <sup>b</sup> | Num total <sup>c</sup> | Term                             | Ontology |
|------------|-----------------------|----------------------------|------------------------|----------------------------------|----------|
| GO:0016209 | 0.0000                | 7                          | 8                      | antioxidant activity             | MF       |
| GO:0051920 | 0.0000                | 7                          | 8                      | peroxiredoxin activity           | MF       |
| GO:0008234 | 0.0000                | 8                          | 13                     | cysteine-type peptidase activity | CC       |
| GO:0006308 | 0.000                 | 6                          | 9                      | DNA catabolic process            | BP       |
| GO:0004806 | 0.001                 | 7                          | 11                     | triglyceride lipase activity     | MF       |

(a) The confidence that a given category is enriched in the developmental stage. (b) Number of genes from the pathway that were found in a given developmental stage. (c) the total number of genes with that annotation in the genome.

B. Enrichment of GO categories, Upregulated in PP vs. AM (18 categories)

| Category   | Adj pval | Num in subset | Num total | Term                                           | Ontology |
|------------|----------|---------------|-----------|------------------------------------------------|----------|
| GO:0000786 | 0.0000   | 14            | 29        | nucleosome                                     | CC       |
| GO:0003924 | 0.0000   | 24            | 86        | GTPase activity                                | MF       |
| GO:0015986 | 0.001    | 6             | 8         | ATP synthesis coupled proton transport         |          |
| GO:0005516 | 0.0000   | 8             | 12        | calmodulin binding                             | MF       |
| GO:0009190 | 0.0000   | 9             | 12        | cyclic nucleotide biosynthetic process         |          |
| GO:0035556 | 0.001    | 10            | 19        | intracellular signal transduction              | BP       |
| GO:0005525 | 0.0000   | 26            | 128       | GTP binding                                    | MF       |
| GO:0003677 | 0.003    | 32            | 161       | DNA binding                                    | MF       |
| GO:0006334 | 0.0000   | 14            | 33        | nucleosome assembly                            | BP       |
| GO:0030286 | 0.0000   | 12            | 15        | dynein complex                                 | CC       |
| GO:0031514 | 0.0000   | 11            | 28        | motile cilium                                  | CC       |
| GO:0043234 | 0.0000   | 24            | 36        | protein complex                                | CC       |
| GO:0046982 | 0.0000   | 14            | 31        | protein heterodimerization activity            | MF       |
| GO:0051258 | 0.0000   | 24            | 35        | protein polymerization                         | BP       |
| GO:0016849 | 0.0000   | 9             | 12        | phosphorus-oxygen lyase activity               | MF       |
| GO:0004198 | 0.033    | 8             | 23        | calcium-dependent cysteine-type endopeptidase  | MF       |
| GO:0006508 | 0.005    | 22            | 91        | proteolysis                                    | BP       |
| GO:0000275 | 0.005    | 4             | 4         | mitochondrial proton-transporting ATP synthase | CC       |

C. Enrichment of GO categories, downregulated in NP vs. PP (7 categories)

| Category   | Adj pval | Num in subset | Num total | Term                       | Ontology |
|------------|----------|---------------|-----------|----------------------------|----------|
| GO:0000786 | 0.000    | 16            | 29        | nucleosome                 | CC       |
| GO:0046982 | 0.000    | 16            | 31        | protein heterodimerization | MF       |
| GO:0006334 | 0.000    | 16            | 33        | nucleosome assembly        | BP       |
| GO:0003677 | 0.000    | 24            | 161       | DNA binding                | MF       |
| GO:0005634 | 0.000    | 19            | 149       | nucleus                    | CC       |
| GO:0000776 | 0.005    | 4             | 5         | kinetochore                | CC       |
| GO:0005516 | 0.009    | 5             | 12        | calmodulin binding         | MF       |

D. Enrichment of GO categories, downregulated in MP vs. NP (2 categories)

| Category   | Adj pval | Num in subset | Num total | Term                     | Ontology |
|------------|----------|---------------|-----------|--------------------------|----------|
| GO:0006364 | 0.025    | 6             | 15        | rRNA processing          | BP       |
| GO:0032040 | 0.049    | 4             | 6         | small-subunit processome | CC       |

E. Enrichment of GO categories, upregulation in MP vs. PP (14 categories)

| Category   | Adj pval | Num in subset | Num total | Term                                          | Ontology |
|------------|----------|---------------|-----------|-----------------------------------------------|----------|
| GO:0009190 | 0.004    | 6             | 12        | cyclic nucleotide biosynthetic process        | BP       |
| GO:0016849 | 0.004    | 6             | 12        | phosphorus-oxygen lyase activity              | MF       |
| GO:0022857 | 0.004    | 4             | 6         | transmembrane transporter activity            | MF       |
| GO:0002036 | 0.004    | 3             | 3         | regulation of L-glutamate transport           | BP       |
| GO:0015193 | 0.004    | 3             | 3         | L-proline transmembrane transporter activity  | MF       |
| GO:0015893 | 0.004    | 3             | 3         | drug transport                                | BP       |
| GO:0022858 | 0.004    | 3             | 3         | alanine transmembrane transporter activity    | MF       |
| GO:0035524 | 0.004    | 3             | 3         | proline transmembrane transport               | BP       |
| GO:0051955 | 0.004    | 3             | 3         | regulation of amino acid transport            | BP       |
| GO:0070881 | 0.004    | 3             | 3         | regulation of proline transport               | BP       |
| GO:0080144 | 0.004    | 3             | 3         | amino acid homeostasis                        | BP       |
| GO:0006971 | 0.013    | 3             | 4         | hypotonic response                            | BP       |
| GO:0035556 | 19 0.013 | 6             | 19        | intracellular signal transduction             | BP       |
| GO:0005337 | 0.036    | 3             | 5         | nucleoside transmembrane transporter activity | MF       |

F. Enrichment of GO categories, downregulated in MP vs. PP (8 categories)

| Category   | Adj pval | Num in subset | Num total | Term                                    | Ontology |
|------------|----------|---------------|-----------|-----------------------------------------|----------|
| GO:0003677 | 0.002    | 18            | 161       | DNA binding                             | MF       |
| GO:0000786 | 0.002    | 8             | 29        | nucleosome                              | CC       |
| GO:0046982 | 0.002    | 8             | 31        | protein heterodimerization              | MF       |
| GO:0006334 | 0.003    | 8             | 33        | nucleosome assembly                     | BP       |
| GO:0044267 | 0.007    | 5             | 12        | cellular protein metabolic process      | BP       |
| GO:0015991 | 0.018    | 6             | 23        | ATP hydrolysis coupled proton transport | BP       |
| GO:0051258 | 0.023    | 7             | 35        | protein polymerization                  | BP       |
| GO:0043234 | 0.024    | 7             | 36        | protein complex                         | CC       |

G. Enrichment of GO categories, Upregulated in MP vs. AM (34 categories)

| Category   | Adj pval | Num in subset | Num total | Term                                          | Ontology |
|------------|----------|---------------|-----------|-----------------------------------------------|----------|
| GO:0000786 | 0.000    | 19            | 29        | nucleosome                                    | CC       |
| GO:0046982 | 0.000    | 19            | 31        | protein heterodimerization activity           | MF       |
| GO:0006334 | 0.000    | 19            | 33        | nucleosome assembly                           | BP       |
| GO:0051258 | 0.000    | 18            | 35        | protein polymerization                        | BP       |
| GO:0043234 | 0.000    | 18            | 36        | protein complex                               | CC       |
| GO:0009190 | 0.000    | 9             | 12        | cyclic nucleotide biosynthetic process        | BP       |
| GO:0016849 | 0.000    | 9             | 12        | phosphorus-oxygen lyase activity              | MF       |
| GO:0003924 | 0.000    | 18            | 86        | GTPase activity                               | MF       |
| GO:0031514 | 0.000    | 12            | 28        | motile cilium                                 | CC       |
| GO:0005516 | 0.000    | 7             | 12        | calmodulin binding                            | MF       |
| GO:0035556 | 0.000    | 9             | 19        | intracellular signal transduction             | BP       |
| GO:0022857 | 0.000    | 5             | 6         | transmembrane transporter activity            | MF       |
| GO:0005337 | 0.006    | 4             | 5         | nucleoside transmembrane transporter activity | MF       |
| GO:0007155 | 0.010    | 4             | 6         | cell adhesion                                 | BP       |
| GO:0002036 | 0.010    | 3             | 3         | regulation of L-glutamate transport           | BP       |
| GO:0015193 | 0.010    | 3             | 3         | L-proline transmembrane transporter activity  | MF       |
| GO:0015893 | 0.010    | 3             | 3         | drug transport                                | BP       |
| GO:0022858 | 0.010    | 3             | 3         | alanine transmembrane transporter activity    | MF       |
| GO:0035524 | 0.010    | 3             | 3         | proline transmembrane transport               | BP       |
| GO:0051955 | 0.010    | 3             | 3         | regulation of amino acid transport            | BP       |
| GO:0070881 | 0.010    | 3             | 3         | regulation of proline transport               | BP       |
| GO:0080144 | 0.010    | 3             | 3         | amino acid homeostasis                        | BP       |
| GO:0008410 | 0.010    | 3             | 3         | CoA-transferase activity                      | MF       |
| GO:0046952 | 0.010    | 3             | 3         | ketone body catabolic process                 | BP       |
| GO:0005353 | 0.010    | 3             | 3         | fructose transmembrane transporter activity   | MF       |
| GO:0005354 | 0.010    | 3             | 3         | galactose transmembrane transporter activity  | MF       |
| GO:0015578 | 0.010    | 3             | 3         | mannose transmembrane transporter activity    | MF       |
| GO:0015758 | 0.010    | 3             | 3         | glucose transport                             | BP       |

|            |       |    |     |                                                      |    |
|------------|-------|----|-----|------------------------------------------------------|----|
| GO:0005525 | 0.013 | 18 | 129 | GTP binding                                          | MF |
| GO:0006971 | 0.031 | 3  | 3   | hypotonic response                                   | BP |
| GO:0008160 | 0.034 | 3  | 4   | protein tyrosine phosphatase activator activity      | MF |
| GO:0042025 | 0.034 | 3  | 4   | host cell nucleus                                    | CC |
| GO:0044081 | 0.034 | 3  | 4   | modulation by symbiont of host nitric oxide-mediated | BP |
| GO:0075130 | 0.034 | 3  | 4   | modulation by symbiont of host protein kinase-m      | BP |

H. Enrichment of GO categories, downregulated in MP vs. AM (6 categories)

| Category   | Adj pval | Num in subset | Num total | Term                                 | Ontology |
|------------|----------|---------------|-----------|--------------------------------------|----------|
| GO:0016209 | 0.000    | 6             | 8         | antioxidant activity                 | MF       |
| GO:0051920 | 0.000    | 6             | 8         | peroxiredoxin activity               | MF       |
| GO:0008234 | 0.000    | 7             | 13        | cysteine-type peptidase activity     | MF       |
| GO:0006308 | 0.002    | 5             | 9         | DNA catabolic process                | BP       |
| GO:0004197 | 0.014    | 4             | 7         | cysteine-type endopeptidase activity | MF       |
| GO:0004519 | 0.026    | 5             | 5         | endonuclease activity                | MF       |

I. Enrichment of GO categories, Upregulated in NP vs. AM (24 categories)

| Category   | Adj pval | Num in subset | Num total | Term                                         | Ontology |
|------------|----------|---------------|-----------|----------------------------------------------|----------|
| GO:0051258 | 0.000    | 17            | 35        | protein polymerization                       | BP       |
| GO:0043234 | 0.000    | 17            | 36        | protein complex                              | CC       |
| GO:0009190 | 0.000    | 8             | 12        | cyclic nucleotide biosynthetic process       | BP       |
| GO:0016849 | 0.000    | 8             | 12        | phosphorus-oxygen lyase activity             | MF       |
| GO:0003924 | 0.001    | 18            | 86        | GTPase activity                              | MF       |
| GO:0000786 | 0.001    | 8             | 29        | nucleosome                                   | CC       |
| GO:0046982 | 0.002    | 8             | 31        | protein heterodimerization                   | MF       |
| GO:0006508 | 0.004    | 19            | 91        | proteolysis                                  | BP       |
| GO:0006334 | 0.004    | 8             | 33        | nucleosome assembly                          | BP       |
| GO:0035556 | 0.004    | 8             | 19        | intracellular signal transduction            | BP       |
| GO:0005516 | 0.009    | 6             | 12        | calmodulin binding                           | MF       |
| GO:0005525 | 0.012    | 20            | 129       | GTP binding                                  | MF       |
| GO:0005886 | 0.017    | 6             | 15        | plasma membrane                              | CC       |
| GO:0002036 | 0.017    | 3             | 3         | regulation of L-glutamate transport          | BP       |
| GO:0015193 | 0.017    | 3             | 3         | proline transmembrane transporter activity   | MF       |
| GO:0080144 | 0.017    | 3             | 3         | amino acid homeostasis                       | BP       |
| GO:0008410 | 0.017    | 3             | 3         | CoA-transferase activity                     | MF       |
| GO:0046952 | 0.017    | 3             | 3         | ketone body catabolic process                | BP       |
| GO:0022857 | 0.017    | 4             | 6         | transmembrane transporter                    | MF       |
| GO:0031514 | 0.017    | 9             | 28        | motile cilium                                | CC       |
| GO:0005353 | 0.017    | 3             | 3         | fructose transmembrane transporter activity  | MF       |
| GO:0005354 | 0.017    | 3             | 3         | galactose transmembrane transporter activity | MF       |
| GO:0015578 | 0.017    | 3             | 3         | mannose transmembrane transporter activity   | MF       |
| GO:0015758 | 0.017    | 3             | 3         | glucose transport                            | BP       |

J. Enrichment of GO categories, downregulated in NP vs. AM (7 categories)

| <b>Category</b> | <b>Adj pval</b> | <b>Num in subset</b> | <b>Num total</b> | <b>Term</b>                          | <b>Ontology</b> |
|-----------------|-----------------|----------------------|------------------|--------------------------------------|-----------------|
| GO:0016209      | 0.0000          | 7                    | 8                | antioxidant activity                 | MF              |
| GO:0051920      | 0.0000          | 7                    | 8                | peroxiredoxin activity               | MF              |
| GO:0008234      | 0.0000          | 8                    | 13               | cysteine-type peptidase activity     | CC              |
| GO:0004519      | 0.006           | 6                    | 15               | endonuclease activity                | MF              |
| GO:0006308      | 0.000           | 6                    | 9                | DNA catabolic process                | BP              |
| GO:0004197      | 0.024           | 4                    | 7                | cysteine-type endopeptidase activity | MF              |
| GO:0008378      | 0.049           | 4                    | 8                | galactosyltransferase activity       | MF              |
