# Supplementary material for: The Transcriptome of Leishmania major Developmental Stages in Their Natural Sand Fly Vector
Source: PubMed Central journal article supplement (PMC5380837; doi:10.1128/mbio.00029-17), 2017-04-04
Supplement: mbo002173254sd3.pdf [file mbo002173254sd3.pdf]

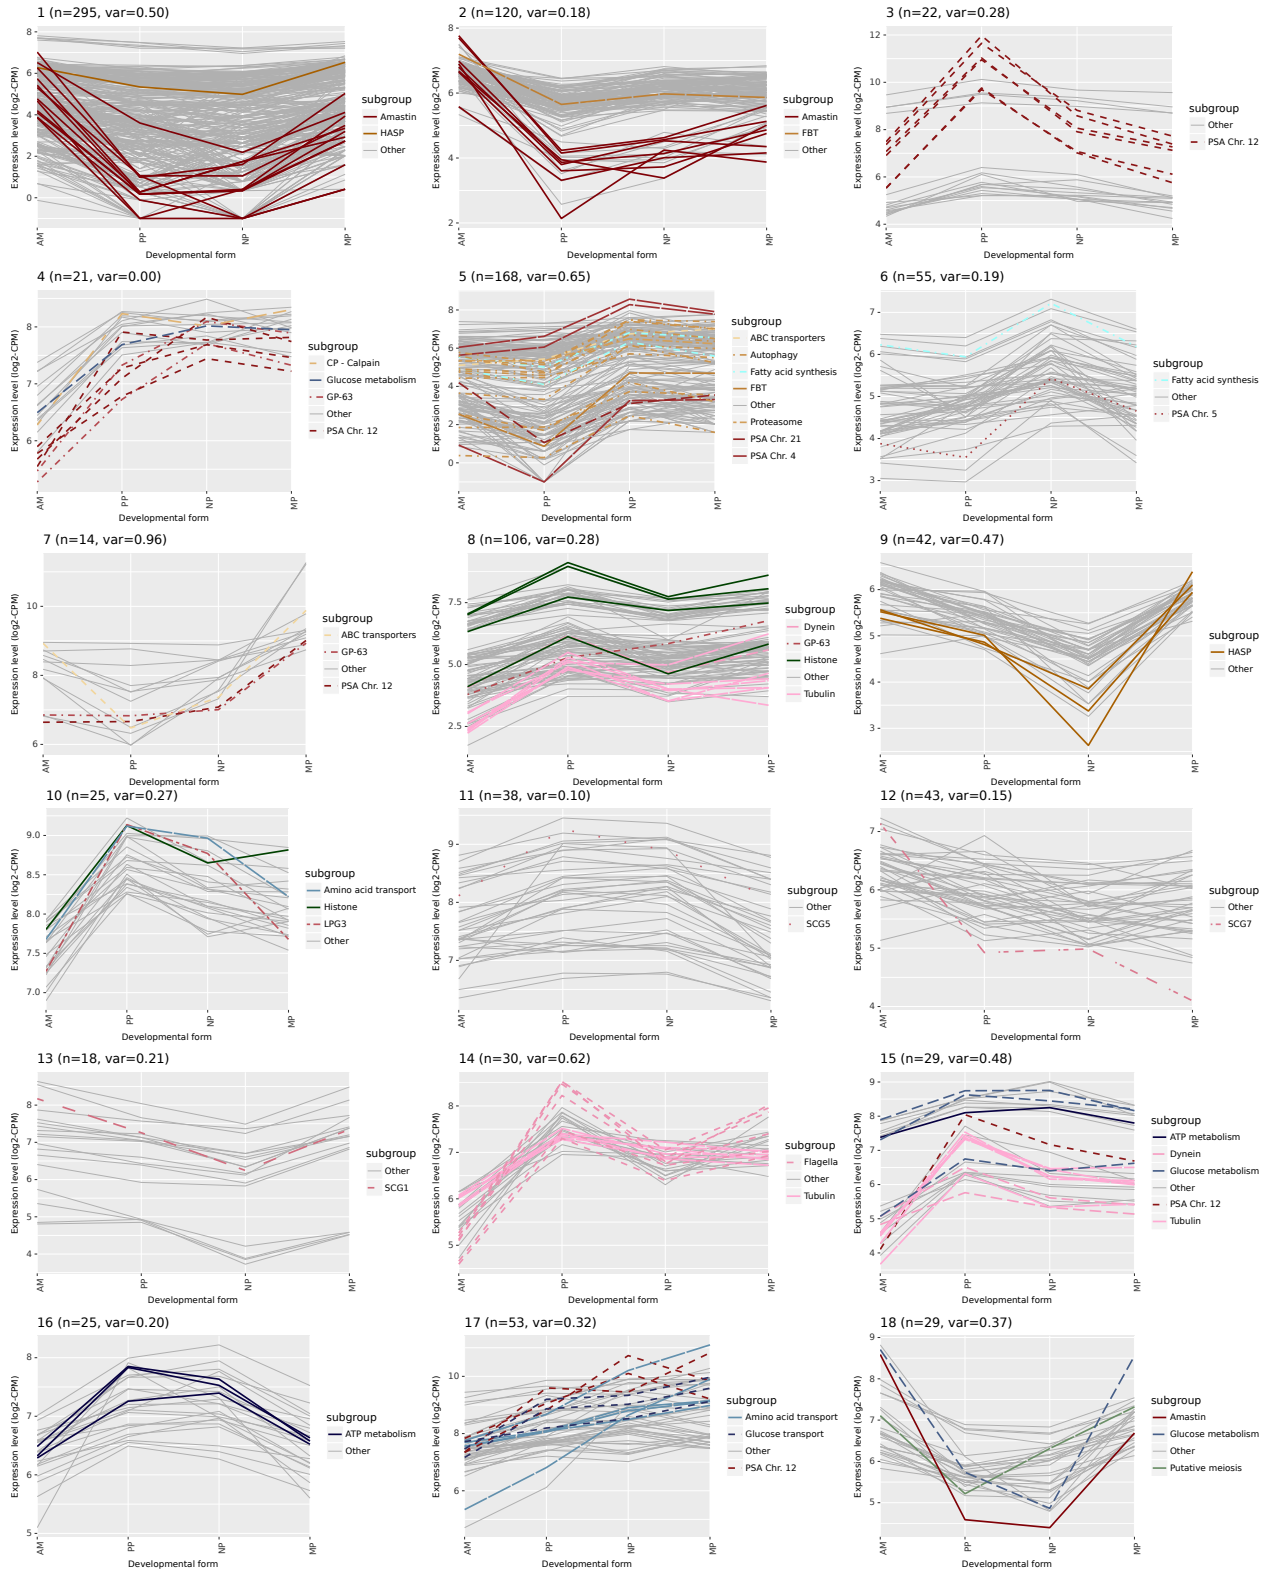

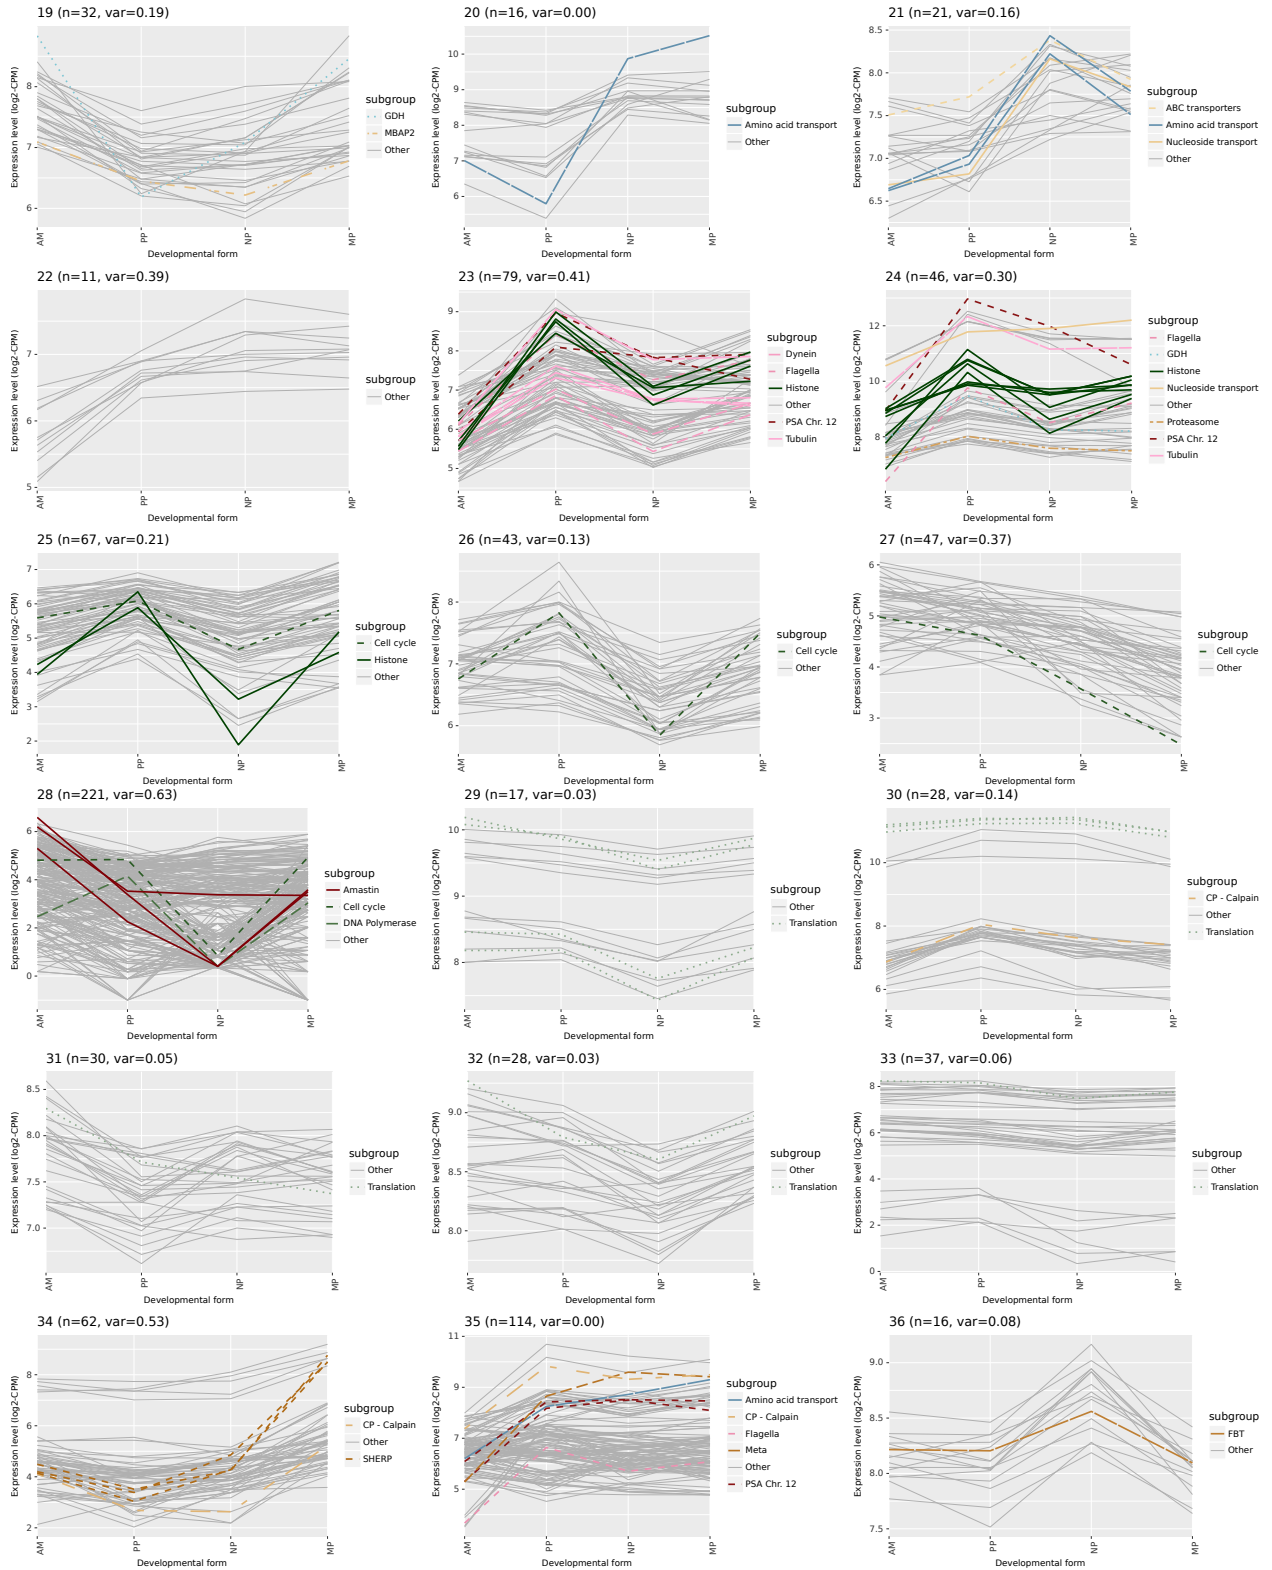

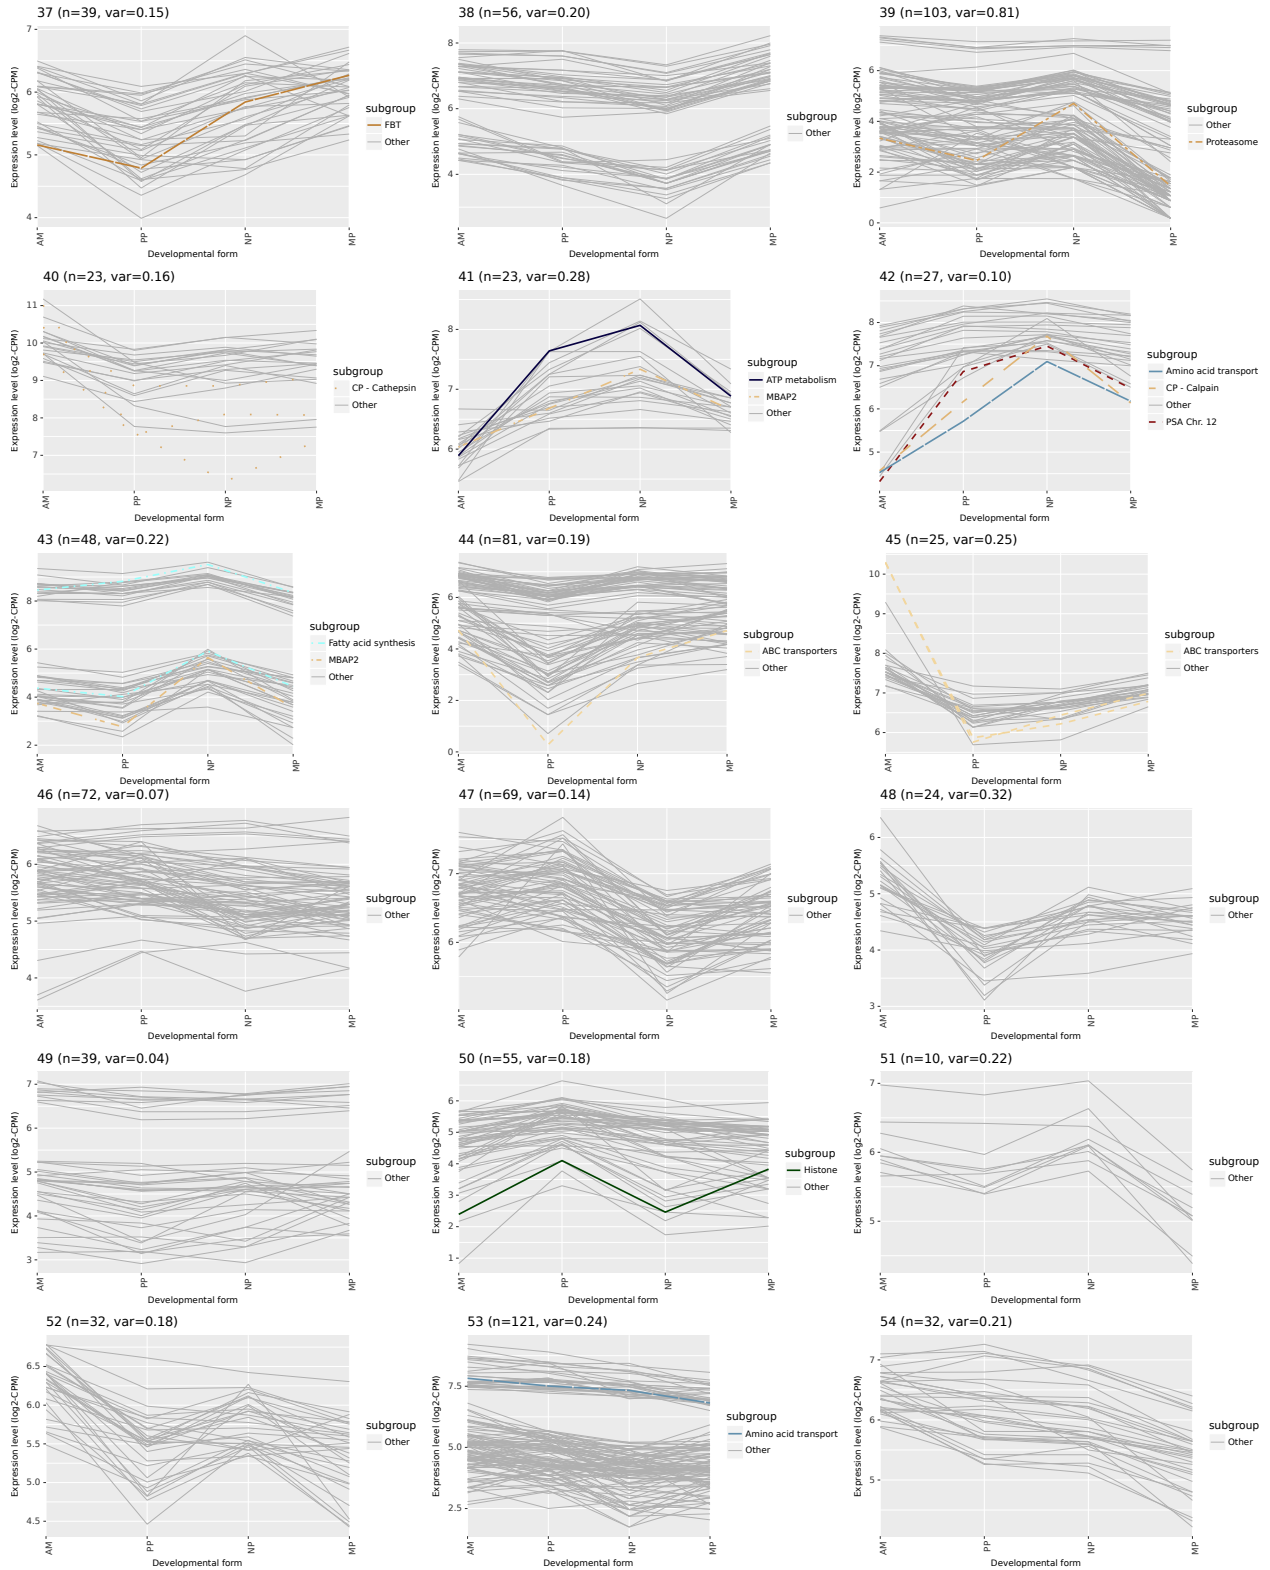

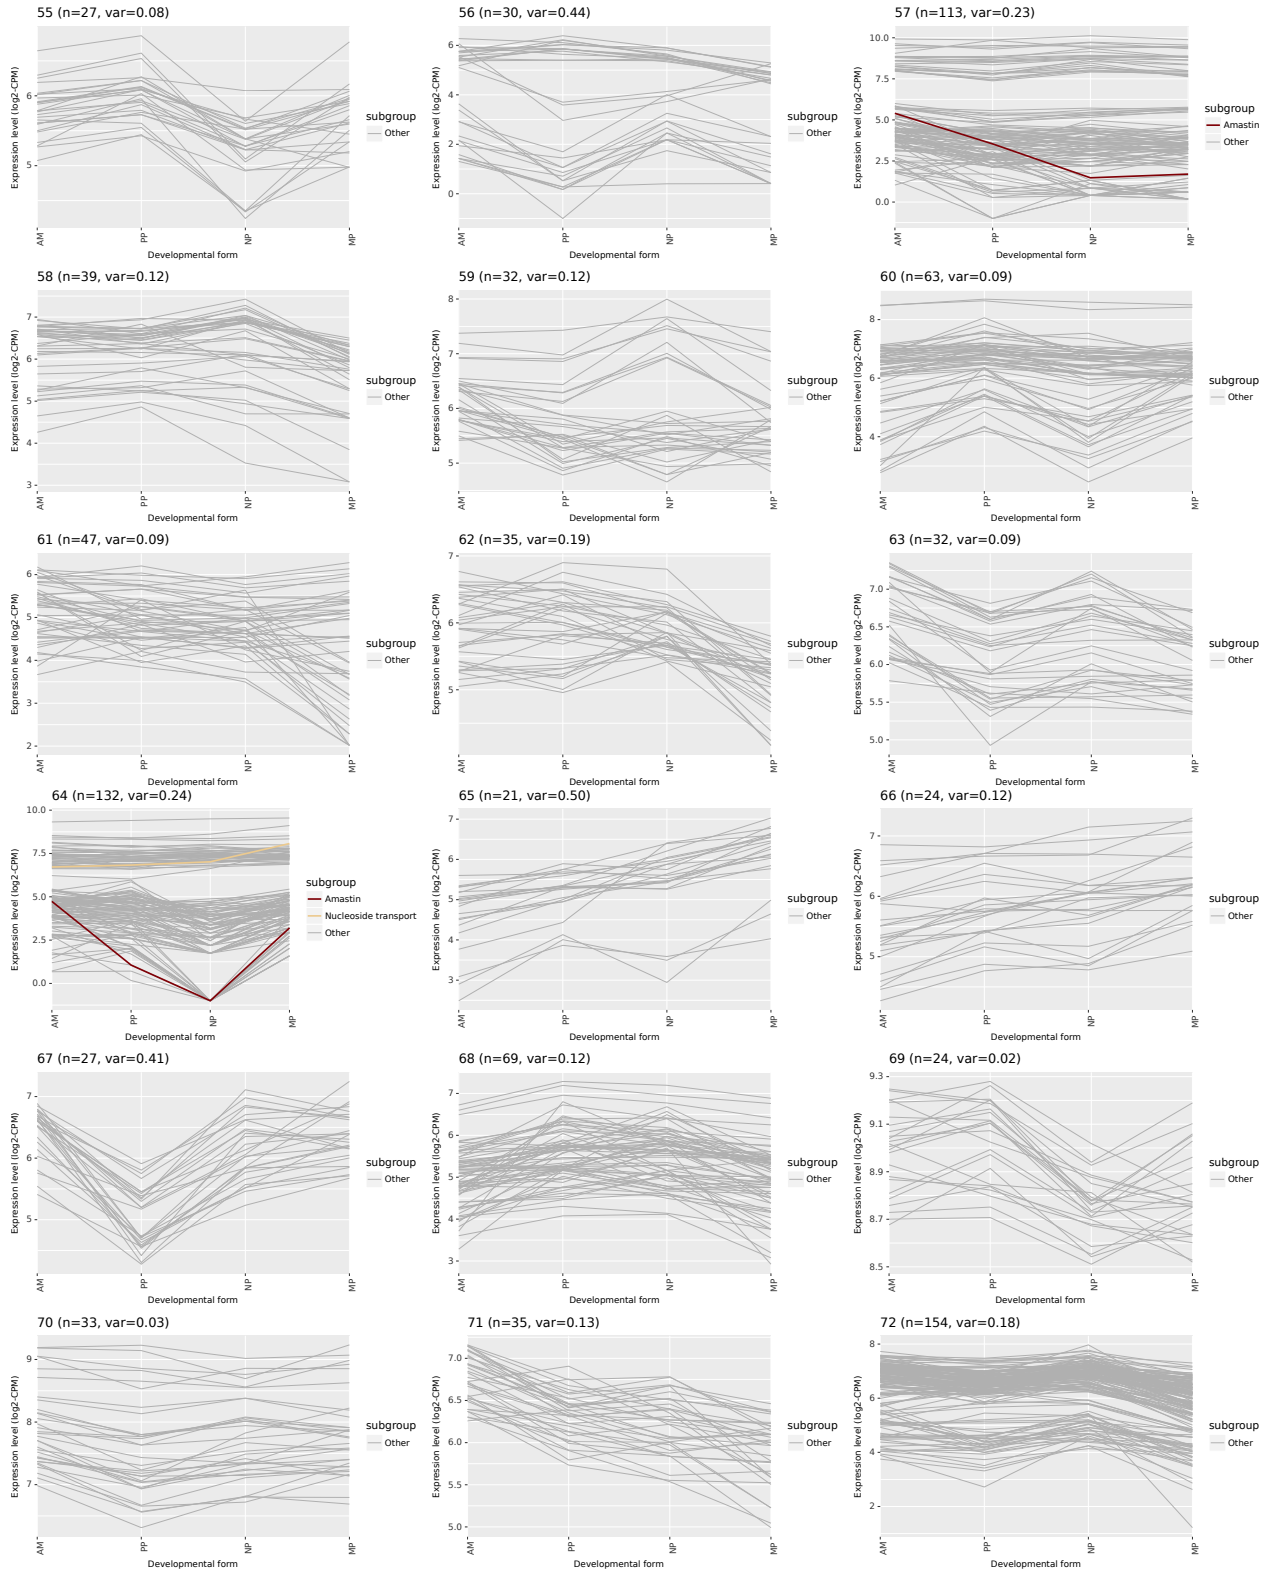

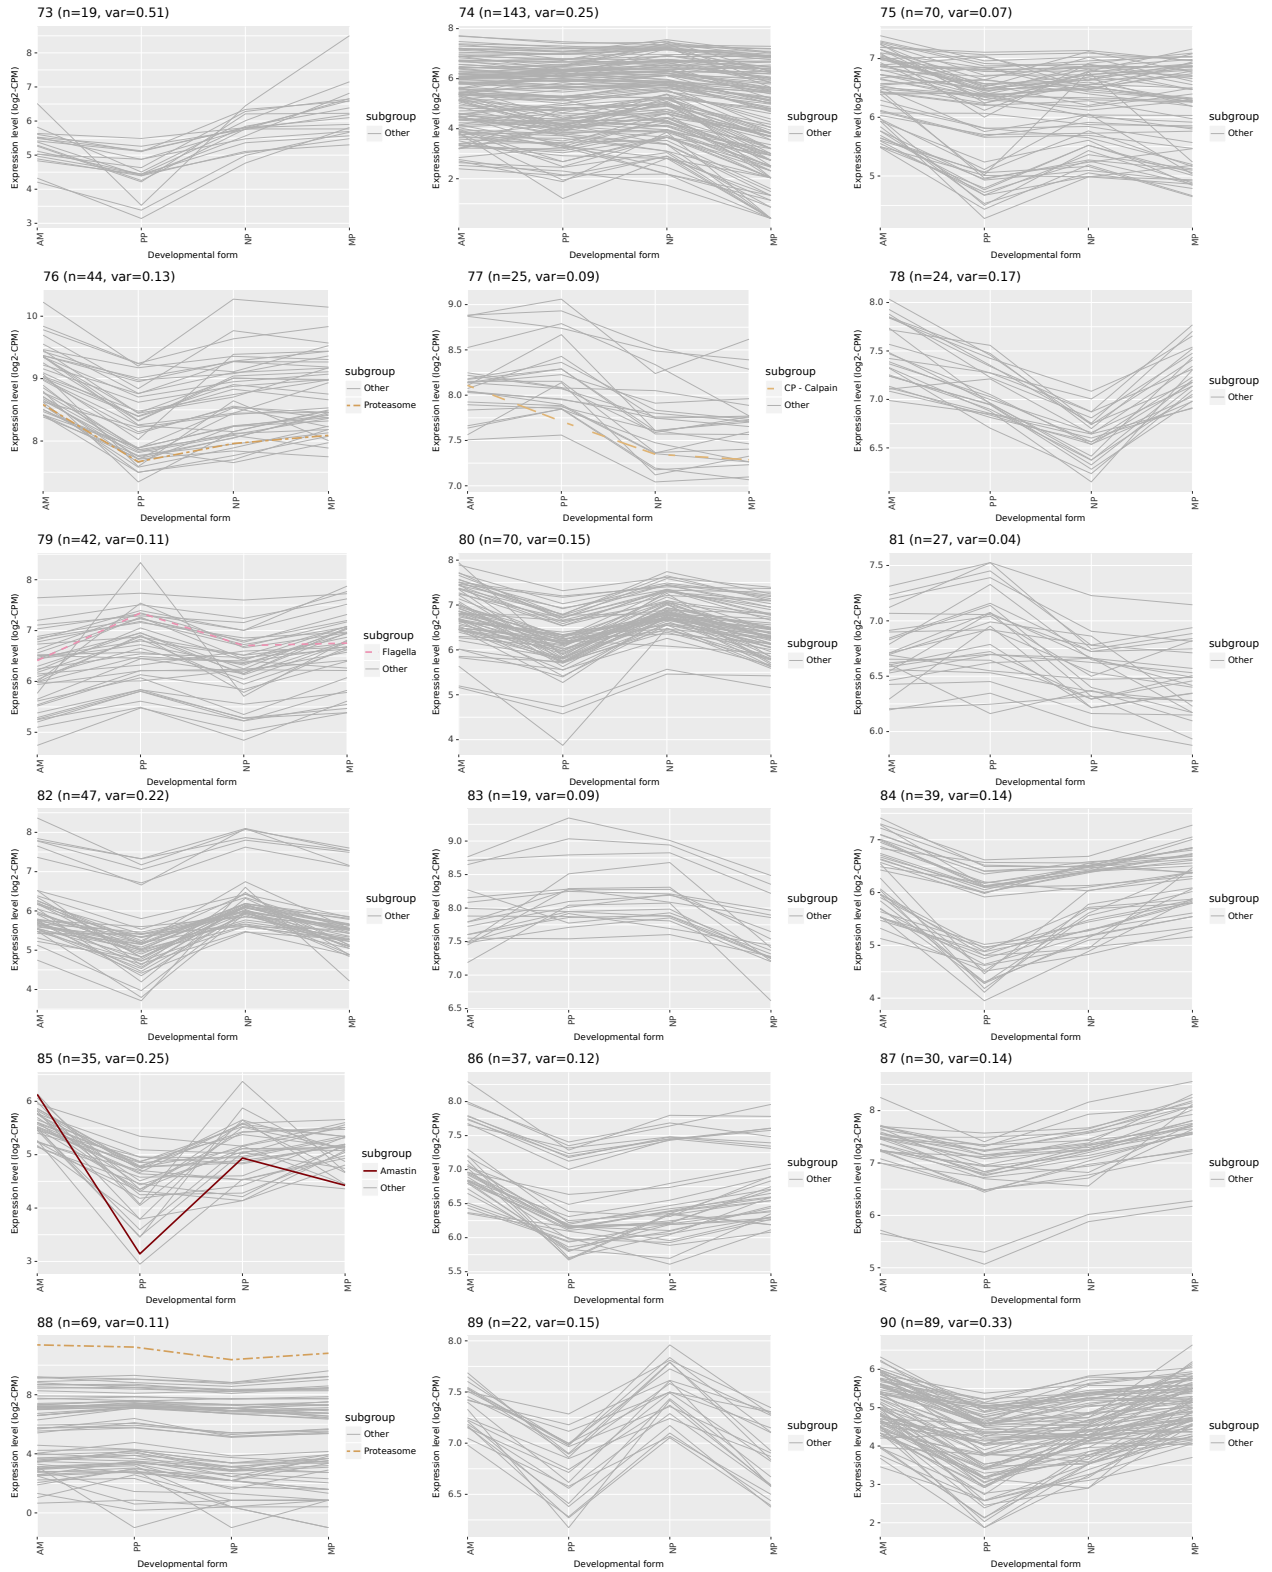

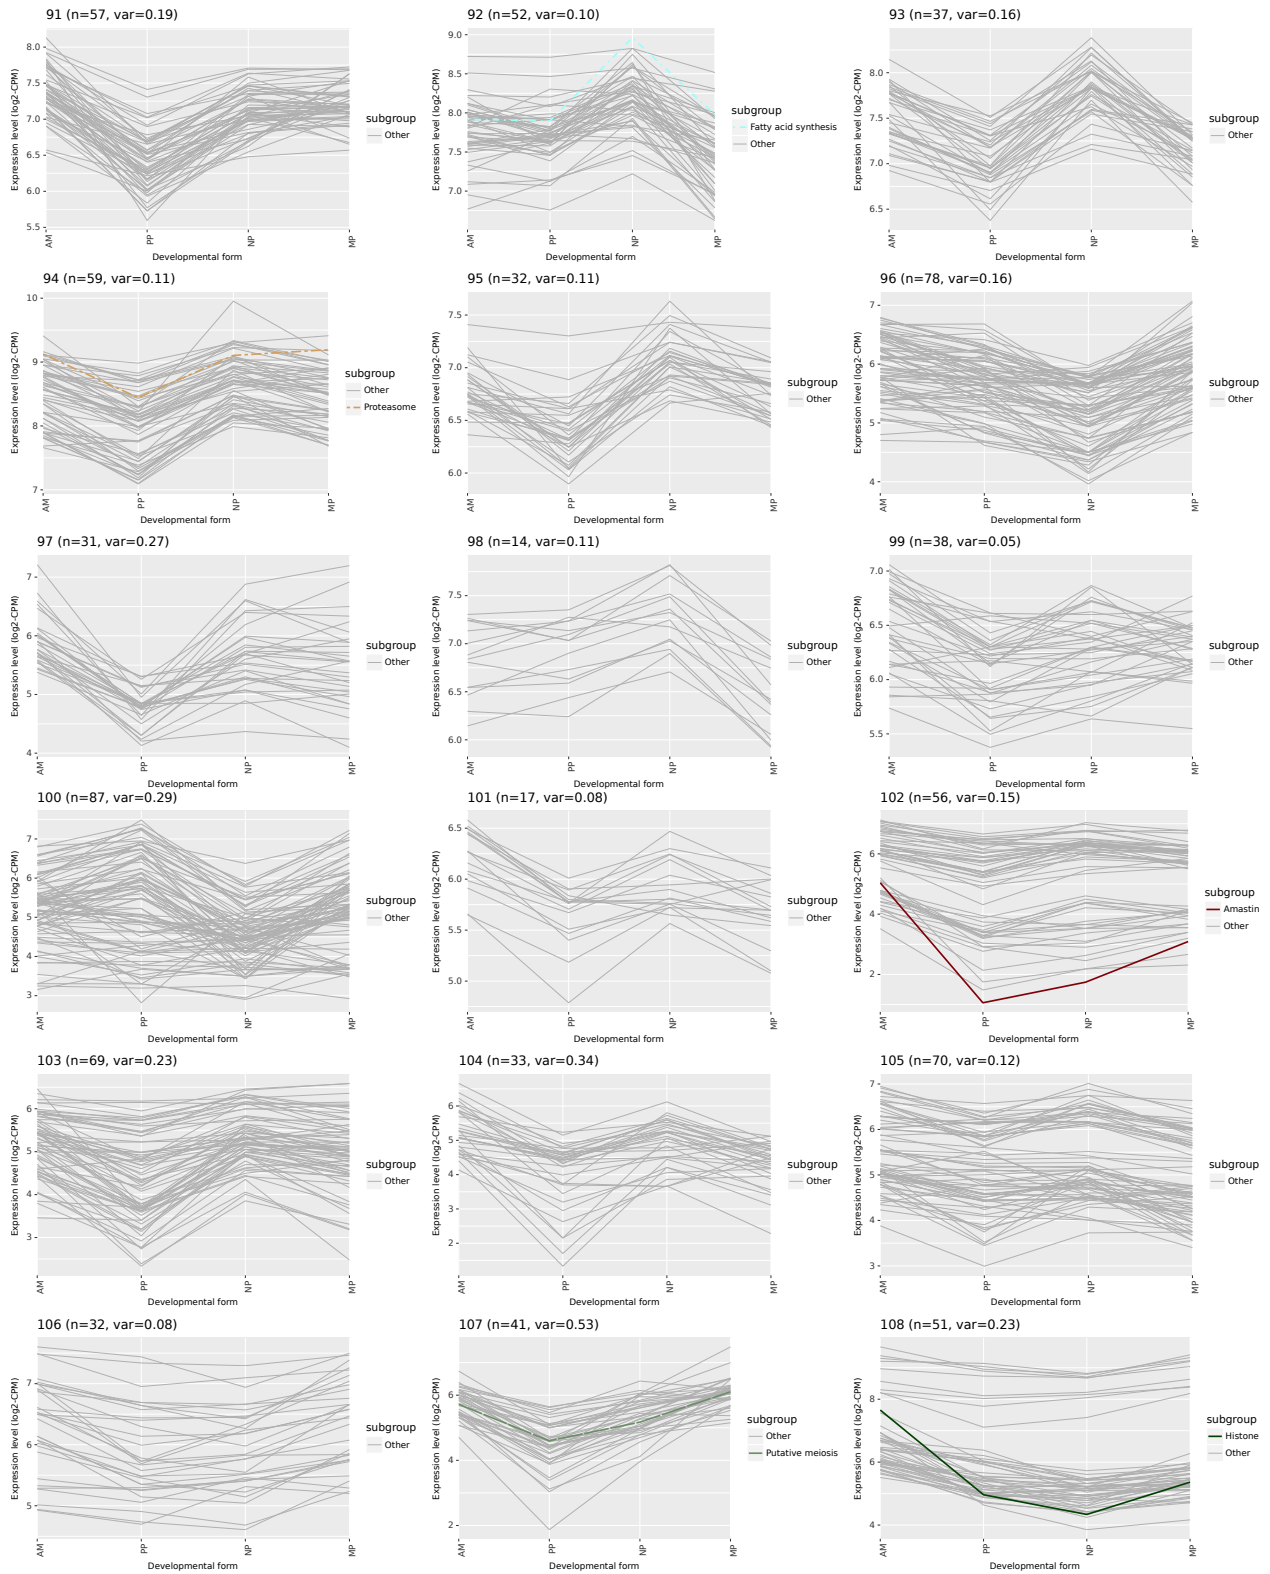

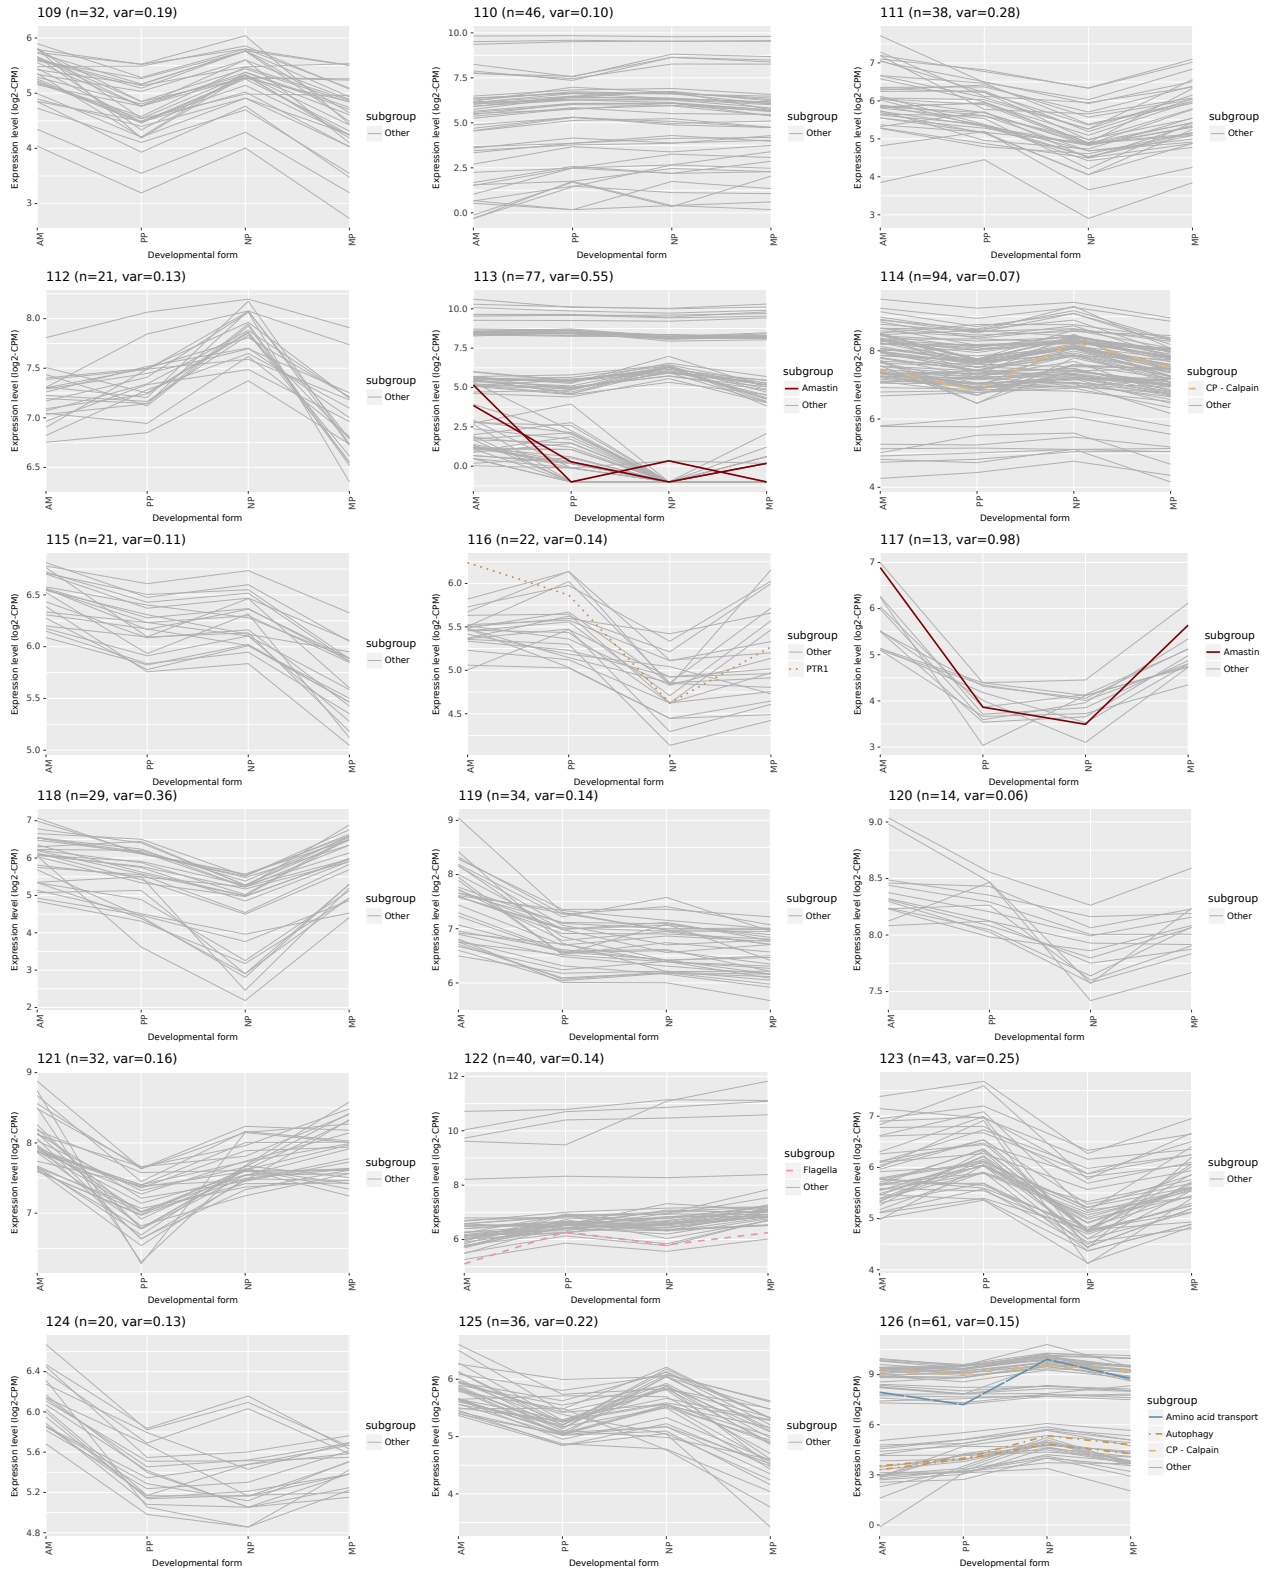

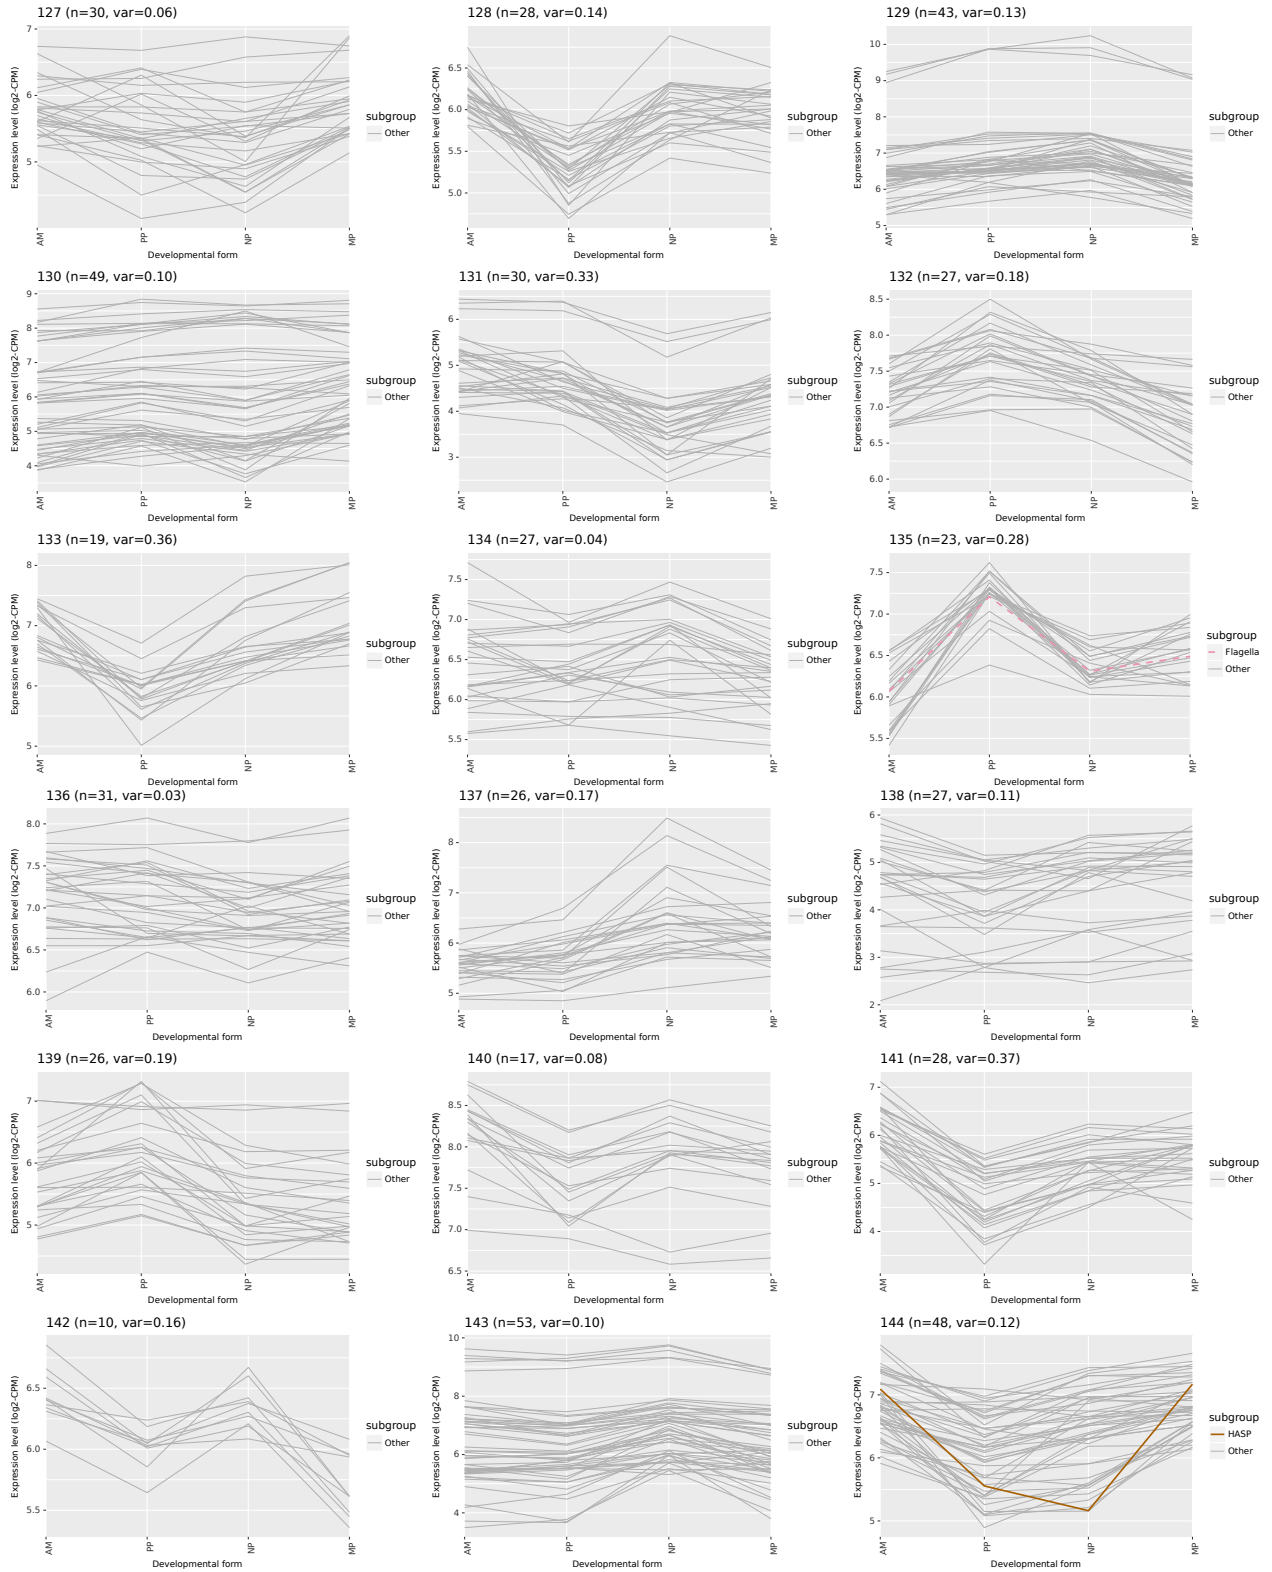



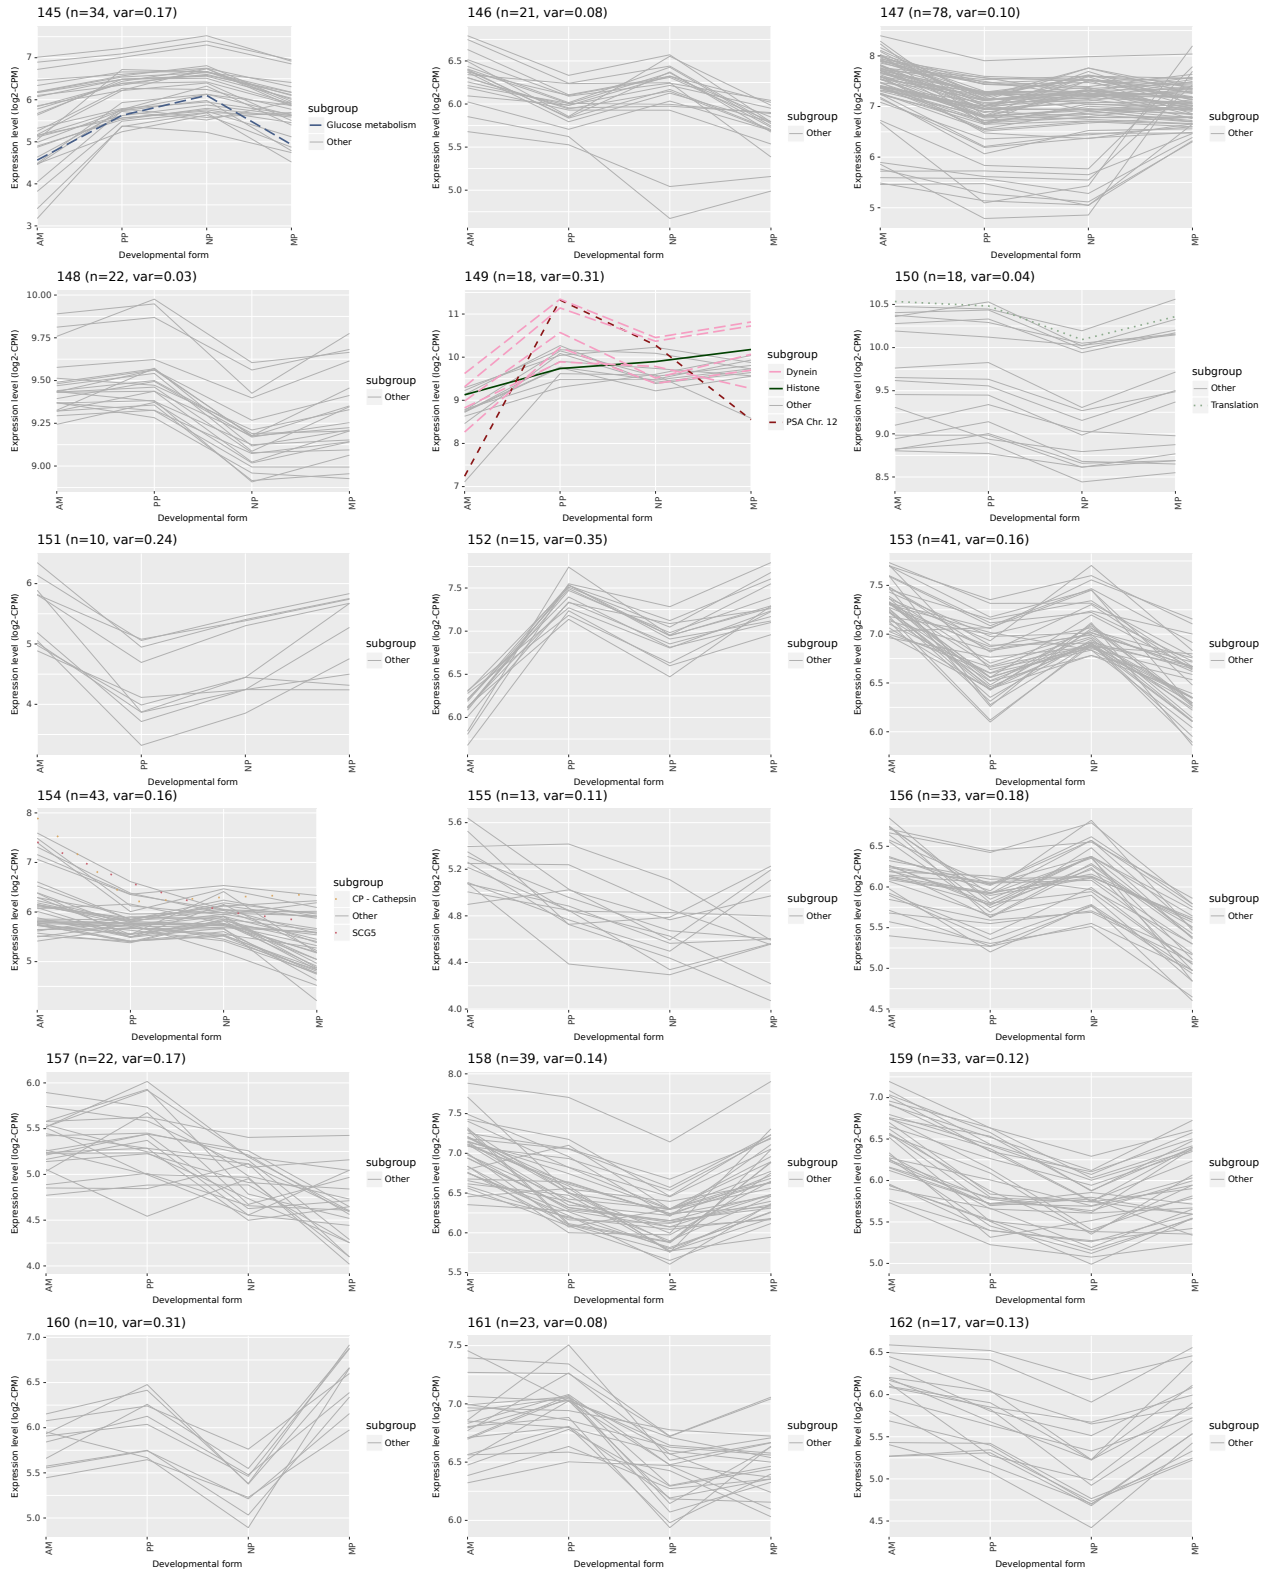

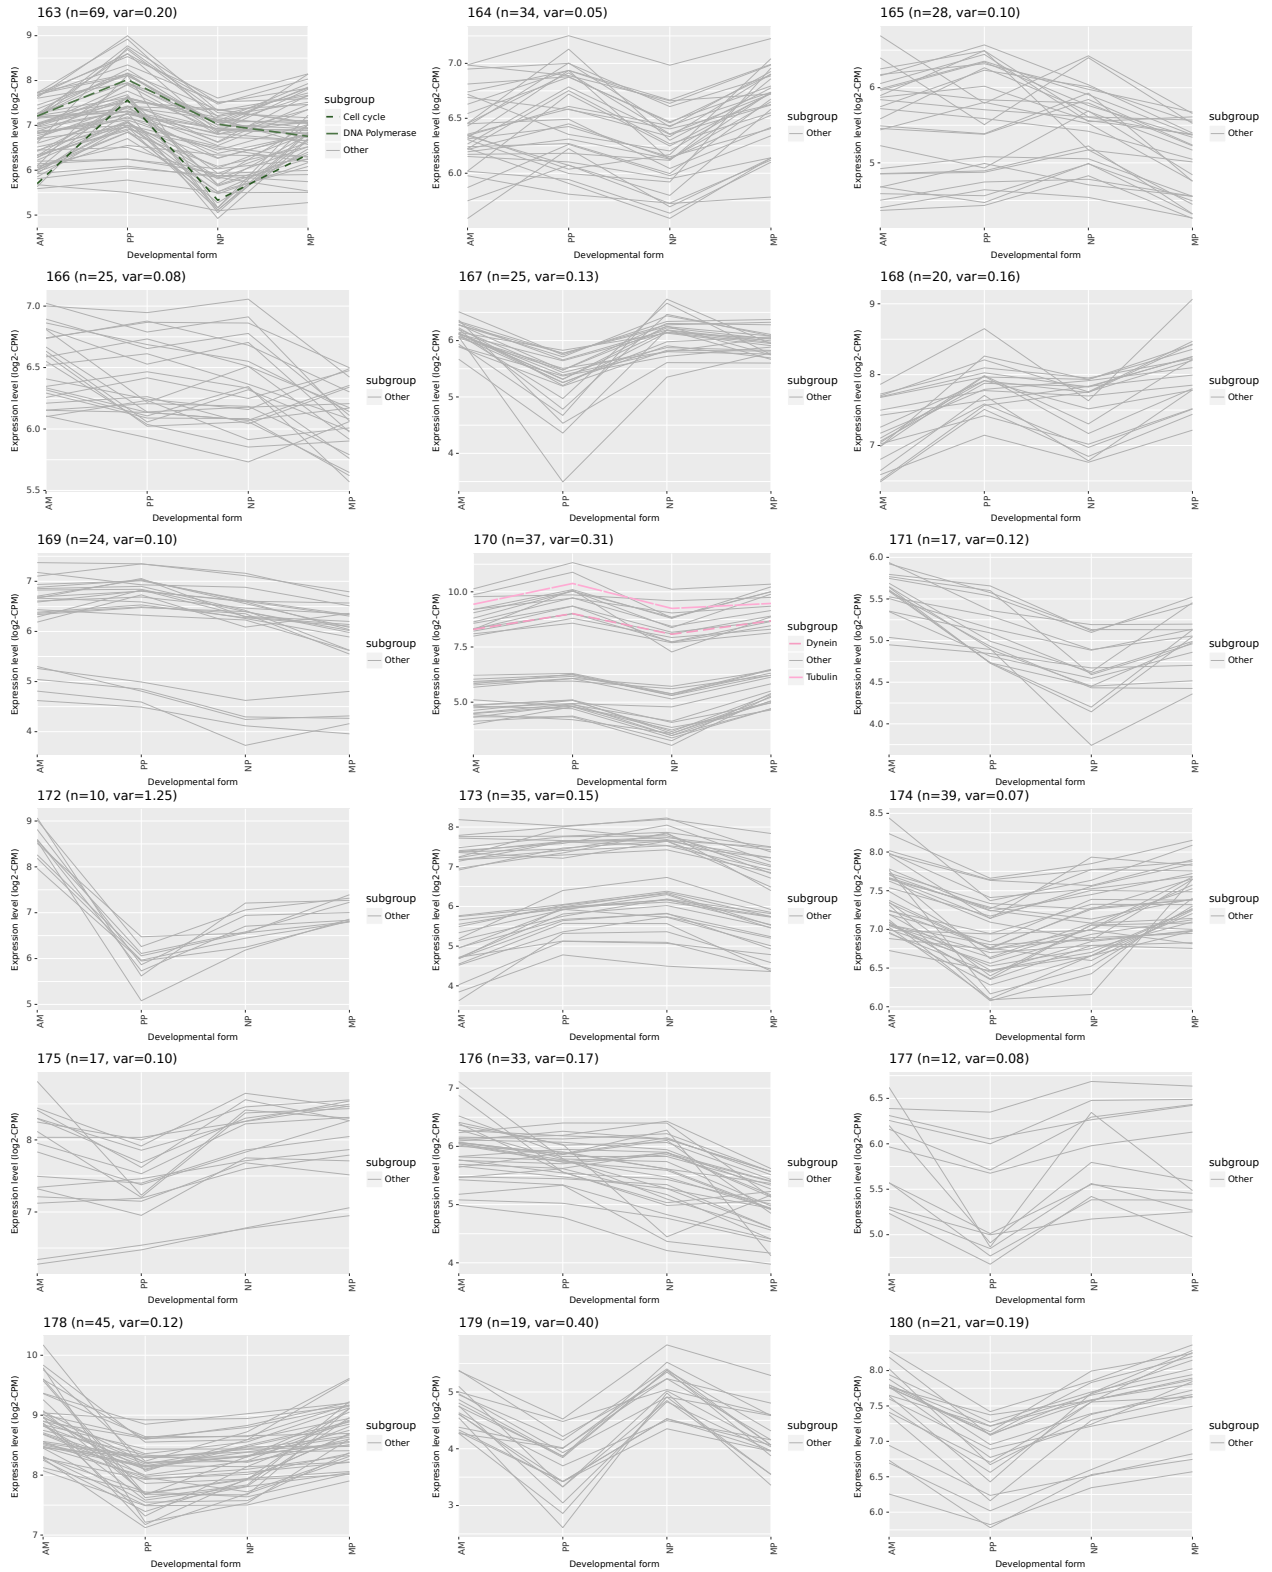

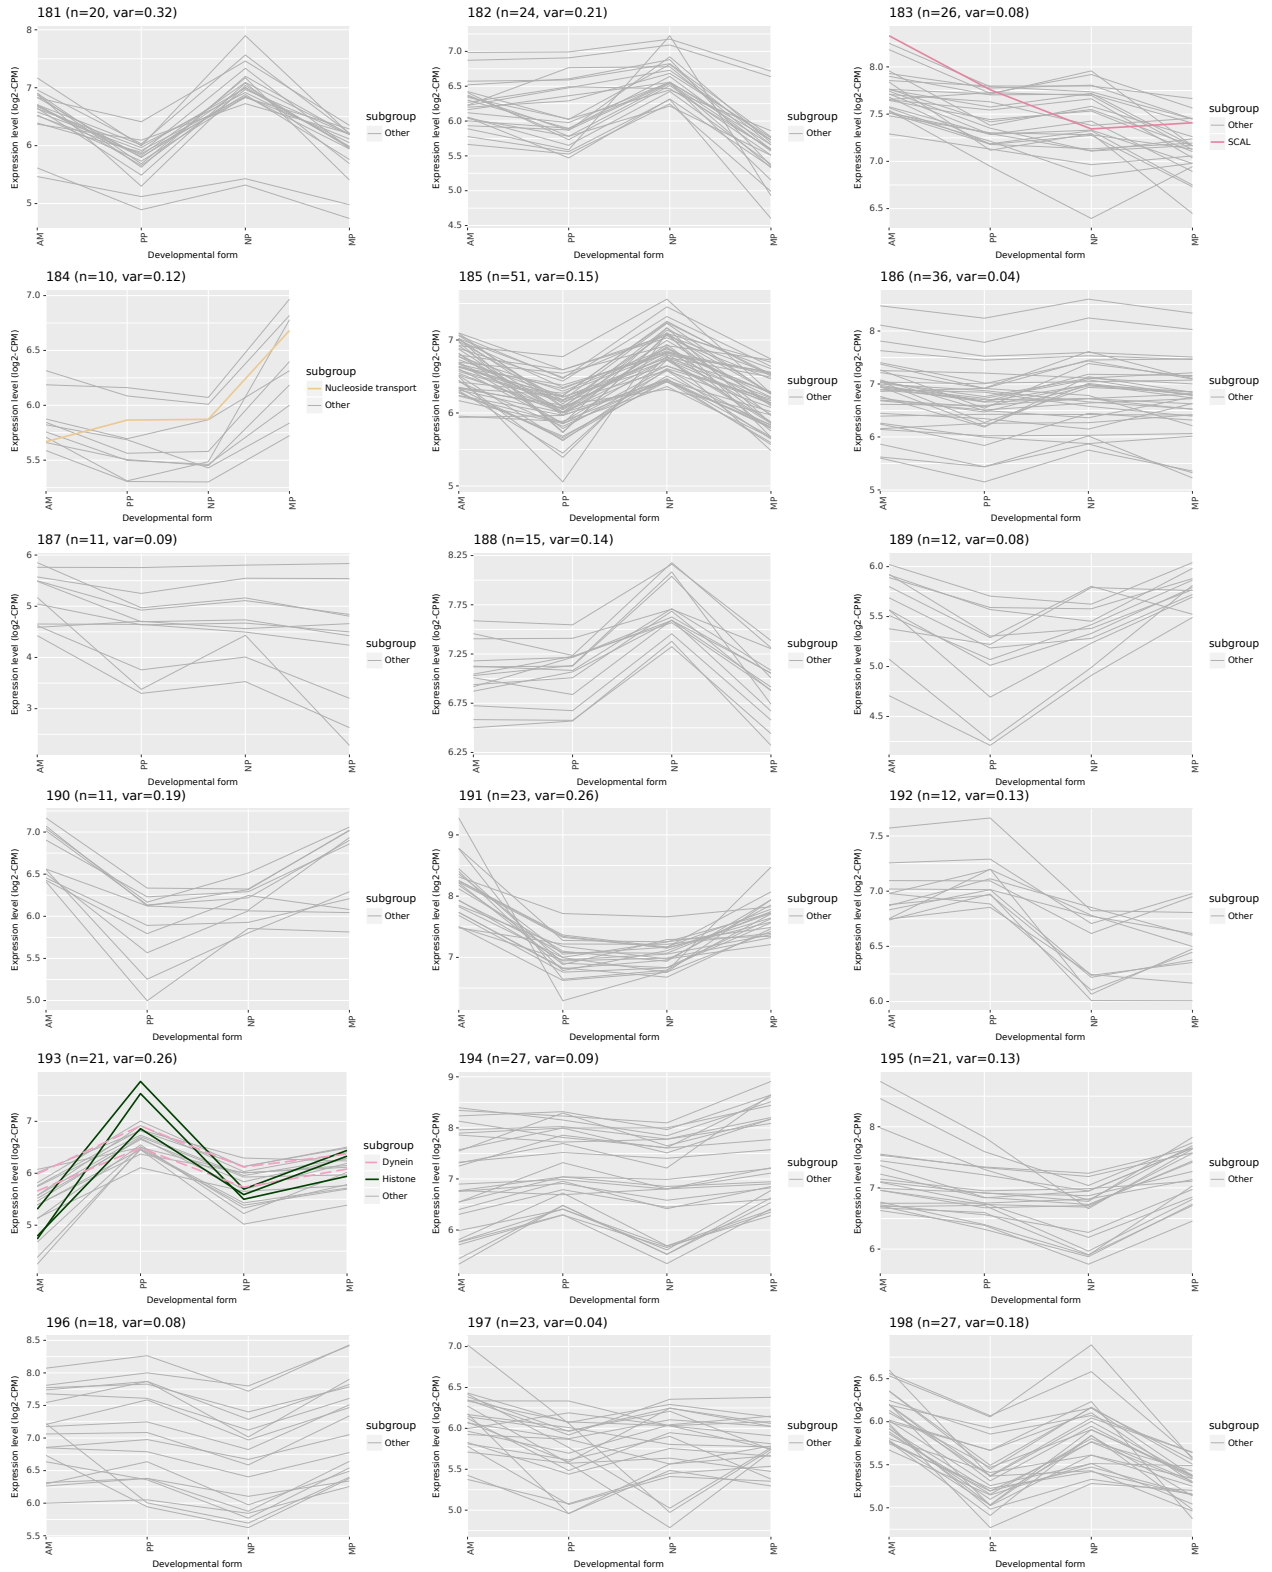

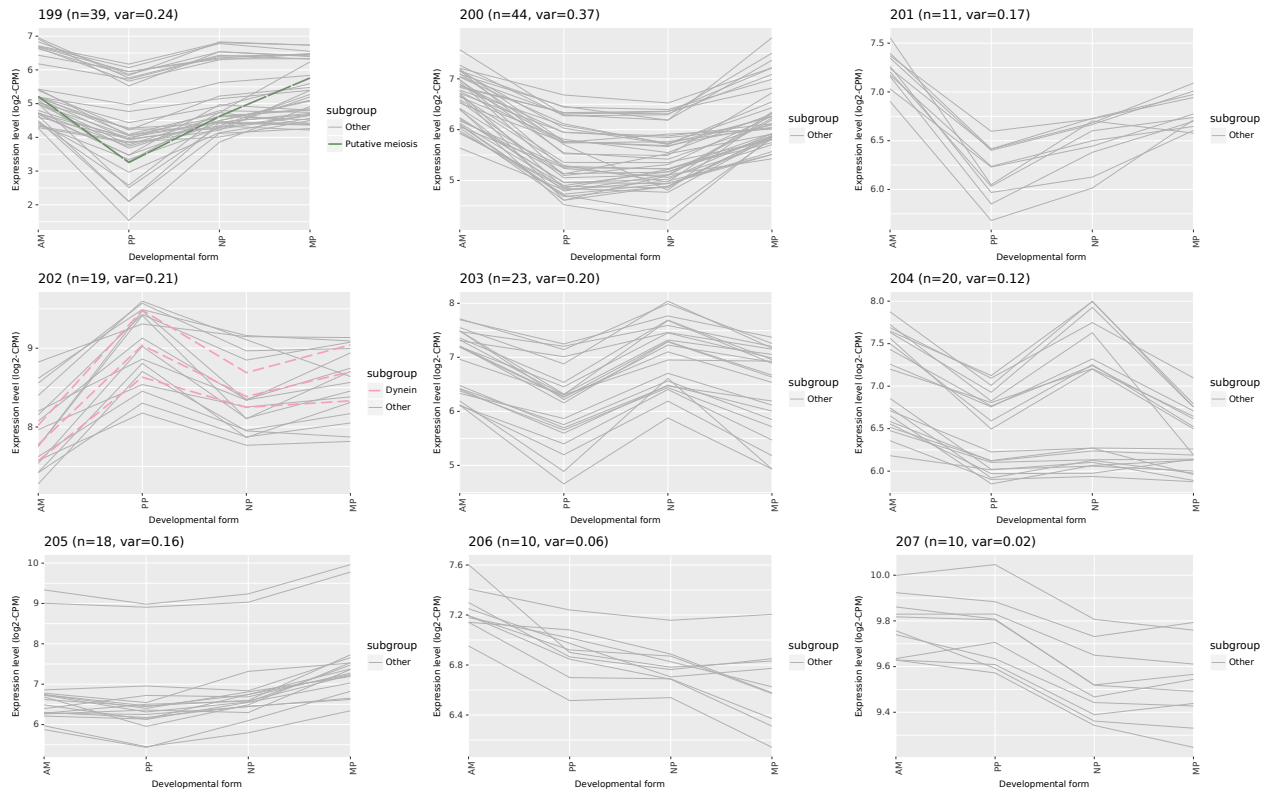

Two hundred and seven co-expression modules for genes with similar mRNA abundance patterns across the different developmental stages. Each line represents a gene, with genes of particular interest labeled with different colors and/or line patterns. The CPM (counts per million) represents the proportion of reads mapped to each *Leishmania* gene multiplied by one million.
