# Supplementary material for: The Transcriptome of Leishmania major Developmental Stages in Their Natural Sand Fly Vector
Source: PubMed Central journal article supplement (PMC5380837; doi:10.1128/mbio.00029-17), 2017-04-04
Supplement: mbo002173254sd5.pdf [file mbo002173254sd5.pdf]

**Enrichment of GO categories; over represented in module 4**

| category   | Adj pval <sup>a</sup> | Num in subset <sup>b</sup> | Num total <sup>c</sup> | Term                                                                       | Ontology |
|------------|-----------------------|----------------------------|------------------------|----------------------------------------------------------------------------|----------|
| GO:0004198 | 0.0328                | 3                          | 23                     | calcium-dependent cysteine-type endopeptidase activity                     | MF       |
| GO:0006508 | 0.0132                | 5                          | 91                     | proteolysis                                                                | BP       |
| GO:0007155 | 0.0328                | 2                          | 6                      | cell adhesion                                                              | BP       |
| GO:0008160 | 0.0164                | 2                          | 4                      | protein tyrosine phosphatase activator activity                            | MF       |
| GO:0042025 | 0.0164                | 2                          | 4                      | host cell nucleus                                                          | CC       |
| GO:0044081 | 0.0164                | 2                          | 4                      | modulation by symbiont of host nitric oxide-mediated signal transduction   | BP       |
| GO:0075130 | 0.0164                | 2                          | 4                      | modulation by symbiont of host protein kinase-mediated signal transduction | BP       |

(a) The confidence that a given category is enriched in the developmental stage. (b) Number of genes from the pathway that were found in a given developmental stage. (c) the total number of genes with that annotation in the genome.

**Enrichment of GO categories; over represented in module 8**

|            | Adj pval | Num in subset | Num total | Term                                | Ontology |
|------------|----------|---------------|-----------|-------------------------------------|----------|
| GO:0000786 | 0.0282   | 5             | 29        | nucleosome                          | CC       |
| GO:0003924 | 0.0018   | 9             | 86        | GTPase activity                     | MF       |
| GO:0005525 | 0.0282   | 9             | 128       | GTP binding                         | MF       |
| GO:0006334 | 0.0338   | 5             | 33        | nucleosome assembly                 | BP       |
| GO:0043234 | 0.0000   | 8             | 36        | protein complex                     | CC       |
| GO:0046982 | 0.0293   | 5             | 31        | protein heterodimerization activity | MF       |
| GO:0051258 | 0.0000   | 8             | 35        | protein polymerization              | BP       |

**Enrichment of GO categories; over represented in module 14**

| Category   | Adj pval | Num in subset | Num total | Term                   | Ontology |
|------------|----------|---------------|-----------|------------------------|----------|
| GO:0003924 | 0.0017   | 6             | 86        | GTPase activity        | MF       |
| GO:0005516 | 0.0000   | 6             | 12        | calmodulin binding     | MF       |
| GO:0005525 | 0.0130   | 6             | 128       | GTP binding            | MF       |
| GO:0031514 | 0.0000   | 6             | 28        | motile cilium          | CC       |
| GO:0043234 | 0.0000   | 6             | 36        | protein complex        | CC       |
| GO:0051258 | 0.0000   | 6             | 35        | protein polymerization | BP       |

**Enrichment of GO/Kegg categories; over represented in module 15**

| Category      | Adj pval | Num in subset | Num total | Term                         | Ontology                                     |
|---------------|----------|---------------|-----------|------------------------------|----------------------------------------------|
| GO:0003924    | 0.0005   | 6             | 86        | GTPase activity              | MF                                           |
| GO:0005525    | 0.0038   | 6             | 128       | GTP binding                  | MF                                           |
| GO:0043234    | 0.0000   | 6             | 36        | protein complex              | CC                                           |
| GO:0051258    | 0.0000   | 6             | 35        | protein polymerization       | BP                                           |
| GO:0051287    | 0.0040   | 3             | 13        | NAD binding                  | MF                                           |
| path:lma00010 | 0.0381   | 4             | 39        | Glycolysis / Gluconeogenesis | Metabolism; Carbohydrate metabolism          |
| path:lma04145 | 0.0019   | 6             | 61        | Phagosome                    | Cellular Processes; Transport and catabolism |

**Enrichment of GO categories; over represented in module 16**

| Category   | Adj pval | Num in subset | Num total | Term                                                                        | Ontology |
|------------|----------|---------------|-----------|-----------------------------------------------------------------------------|----------|
| GO:0000275 | 0.0468   | 2             | 4         | mitochondrial proton-transporting ATP synthase complex, catalytic core F(1) | CC       |
| GO:0004252 | 0.0468   | 2             | 5         | serine-type endopeptidase activity                                          | MF       |
| GO:0015991 | 0.0468   | 3             | 23        | ATP hydrolysis coupled proton transport                                     | BP       |
| GO:0046034 | 0.0468   | 2             | 4         | ATP metabolic process                                                       | BP       |
| GO:0070012 | 0.0298   | 2             | 2         | oligopeptidase activity                                                     | MF       |

**Enrichment of GO categories; over represented in module 17**

| Category   | Adj pval | Num in subset | Num total | Term                                         | Ontology |
|------------|----------|---------------|-----------|----------------------------------------------|----------|
| GO:0002036 | 0.0001   | 3             | 3         | regulation of L-glutamate transport          | BP       |
| GO:0005353 | 0.0001   | 3             | 3         | fructose transmembrane transporter activity  | MF       |
| GO:0005354 | 0.0001   | 3             | 3         | galactose transmembrane transporter activity | MF       |
| GO:0005886 | 0.0007   | 4             | 15        | plasma membrane                              | CC       |
| GO:0006971 | 0.0001   | 3             | 4         | hypotonic response                           | BP       |
| GO:0009190 | 0.0014   | 4             | 12        | cyclic nucleotide biosynthetic process       | BP       |
| GO:0015193 | 0.0001   | 3             | 3         | L-proline transmembrane transporter activity | MF       |
| GO:0015238 | 0.0014   | 3             | 7         | drug transmembrane transporter activity      | MF       |
| GO:0015578 | 0.0001   | 3             | 3         | mannose transmembrane transporter activity   | MF       |
| GO:0015591 | 0.0045   | 2             | 2         | D-ribose transmembrane transporter activity  | MF       |
| GO:0015752 | 0.0045   | 2             | 2         | D-ribose transport                           | BP       |
| GO:0015758 | 0.0001   | 3             | 3         | glucose transport                            | BP       |
| GO:0015893 | 0.0001   | 3             | 3         | drug transport                               | BP       |
| GO:0016849 | 0.0014   | 4             | 12        | phosphorus-oxygen lyase activity             | MF       |
| GO:0022857 | 0.0012   | 3             | 6         | transmembrane transporter activity           | MF       |
| GO:0022858 | 0.0001   | 3             | 3         | alanine transmembrane transporter activity   | MF       |
| GO:0035524 | 0.0001   | 3             | 3         | proline transmembrane transport              | BP       |
| GO:0035556 | 0.0045   | 4             | 20        | intracellular signal transduction            | BP       |
| GO:0051955 | 0.0001   | 3             | 3         | regulation of amino acid transport           | BP       |
| GO:0055056 | 0.0045   | 2             | 2         | D-glucose transmembrane transporter activity | MF       |
| GO:0070258 | 0.0045   | 2             | 2         | inner membrane complex                       | CC       |
| GO:0070881 | 0.0001   | 3             | 3         | regulation of proline transport              | BP       |
| GO:0080144 | 0.0001   | 3             | 3         | amino acid homeostasis                       | BP       |

**Enrichment of GO categories; over represented in module 24**

| Category   | Adj pval | Num in subset | Num total | Term                                | Ontology |
|------------|----------|---------------|-----------|-------------------------------------|----------|
| GO:0000786 | 0.0000   | 7             | 29        | nucleosome                          | CC       |
| GO:0003677 | 0.0236   | 7             | 161       | DNA binding                         | MF       |
| GO:0005634 | 0.0057   | 7             | 149       | nucleus                             | CC       |
| GO:0006334 | 0.0000   | 7             | 33        | nucleosome assembly                 | BP       |
| GO:0043234 | 0.0030   | 4             | 36        | protein complex                     | CC       |
| GO:0046982 | 0.0000   | 7             | 31        | protein heterodimerization activity | MF       |
| GO:0051258 | 0.0030   | 4             | 35        | protein polymerization              | BP       |

**Enrichment of GO/Kegg categories; over represented in module 29**

| Category      | Adj pval | Num in subset | Num total | Term                               | Ontology                                    |
|---------------|----------|---------------|-----------|------------------------------------|---------------------------------------------|
| GO:0003735    | 0        | 13            | 166       | structural constituent of ribosome | MF                                          |
| GO:0005622    | 0        | 12            | 299       | intracellular                      | CC                                          |
| GO:0005840    | 0        | 13            | 157       | ribosome                           | CC                                          |
| GO:0006412    | 0        | 11            | 171       | translation                        | BP                                          |
| path:lma03010 | 0        | 13            | 169       | Ribosome                           | Genetic Information Processing; Translation |

**Enrichment of GO/Kegg categories; over represented in module 30**

| Category   | Adj pval | Num in subset | Num total | Term                                   | Ontology |
|------------|----------|---------------|-----------|----------------------------------------|----------|
| GO:0003746 | 0.037    | 3             | 15        | translation elongation factor activity | MF       |
| GO:0003924 | 0.037    | 5             | 86        | GTPase activity                        | MF       |
| GO:0005525 | 0.037    | 6             | 128       | GTP binding                            | MF       |

**Enrichment of GO/Kegg categories; over represented in module 32**

| <b>Category</b> | <b>Adj pval</b> | <b>Num in subset</b> | <b>Num total</b> | <b>Term</b>                        | <b>Ontology</b>                             |
|-----------------|-----------------|----------------------|------------------|------------------------------------|---------------------------------------------|
| GO:0003735      | 0.0000          | 19                   | 166              | structural constituent of ribosome | MF                                          |
| GO:0005622      | 0.0000          | 17                   | 299              | intracellular                      | CC                                          |
| GO:0005840      | 0.0000          | 17                   | 157              | ribosome                           | CC                                          |
| GO:0006412      | 0.0000          | 18                   | 171              | translation                        | BP                                          |
| GO:0015934      | 0.0051          | 3                    | 10               | large ribosomal subunit            | CC                                          |
| path:lma03010   | 0               | 22                   | 169              | Ribosome                           | Genetic Information Processing; Translation |

**Enrichment of Kegg categories; over represented in module 39**

| <b>Category</b> | <b>Adj pval</b> | <b>Num in subset</b> | <b>Num total</b> | <b>Term</b>   | <b>Ontology</b>                             |
|-----------------|-----------------|----------------------|------------------|---------------|---------------------------------------------|
| path:lma03013   | 0.0329          | 5                    | 49               | RNA transport | Genetic Information Processing; Translation |

**Enrichment of Kegg categories; over represented in module 40**

| <b>Category</b> | <b>Adj pval</b> | <b>Num in subset</b> | <b>Num total</b> | <b>Term</b>                      | <b>Ontology</b> |
|-----------------|-----------------|----------------------|------------------|----------------------------------|-----------------|
| GO:0006950      | 0.0030          | 3                    | 21               | response to stress               | BP              |
| GO:0008234      | 0.0014          | 3                    | 13               | cysteine-type peptidase activity | MF              |
| GO:0016209      | 0.0002          | 3                    | 8                | antioxidant activity             | MF              |
| GO:0051082      | 0.0388          | 3                    | 53               | unfolded protein binding         | MF              |
| GO:0051920      | 0.0002          | 3                    | 8                | peroxiredoxin activity           | MF              |

**Enrichment of GO/Kegg categories; over represented in module 65**

| Category   | Adj pval | Num in subset | Num total | Term                                                  | Ontology |
|------------|----------|---------------|-----------|-------------------------------------------------------|----------|
| GO:0022891 | 0.0088   | 2             | 2         | substrate-specific transmembrane transporter activity | MF       |

**Enrichment of GO/Kegg categories; over represented in module 69**

| Category      | Adj pval | Num in subset | Num total | Term                               | Ontology                                    |
|---------------|----------|---------------|-----------|------------------------------------|---------------------------------------------|
| GO:0003735    | 0e+00    | 19            | 166       | structural constituent of ribosome | MF                                          |
| GO:0005622    | 0e+00    | 15            | 299       | intracellular                      | CC                                          |
| GO:0005840    | 0e+00    | 19            | 157       | ribosome                           | CC                                          |
| GO:0006412    | 0e+00    | 19            | 171       | translation                        | BP                                          |
| GO:0015935    | 2e-04    | 5             | 16        | small ribosomal subunit            | CC                                          |
| path:lma03010 | 0        | 24            | 169       | Ribosome                           | Genetic Information Processing; Translation |

**Enrichment of Kegg categories; over represented in module 70**

| Category      | Adj pval | Num in subset | Num total | Term     | Ontology                                    |
|---------------|----------|---------------|-----------|----------|---------------------------------------------|
| path:lma03010 | 0.0446   | 4             | 169       | Ribosome | Genetic Information Processing; Translation |

**Enrichment of GO/Kegg categories; over represented in module 98**

| Category      | Adj pval | Num in subset | Num total | Term                                        | Ontology                                    |
|---------------|----------|---------------|-----------|---------------------------------------------|---------------------------------------------|
| GO:0004812    | 0.0118   | 3             | 24        | aminoacyl-tRNA ligase activity              | MF                                          |
| GO:0006418    | 0.0118   | 3             | 24        | tRNA aminoacylation for protein translation | BP                                          |
| path:lma00970 | 0.0112   | 3             | 28        | Aminoacyl-tRNA biosynthesis                 | Genetic Information Processing; Translation |

**Enrichment of GO/Kegg categories; over represented in module 110**

| Category   | Adj pval | Num in subset | Num total | Term                                             | Ontology |
|------------|----------|---------------|-----------|--------------------------------------------------|----------|
| GO:0004478 | 0.0097   | 2             | 2         | methionine<br>adenosyltransferase<br>activity    | MF       |
| GO:0006556 | 0.0097   | 2             | 2         | S-<br>adenosylmethionine<br>biosynthetic process | BP       |
| GO:0015948 | 0.0097   | 2             | 2         | methanogenesis                                   | BP       |

**Enrichment of GO/Kegg categories; over represented in module 113**

| Category      | Adj pval | Num in subset | Num total | Term        | Ontology                                             |
|---------------|----------|---------------|-----------|-------------|------------------------------------------------------|
| GO:0006412    | 0.0327   | 13            | 171       | translation | BP                                                   |
| path:lma03010 | 1e-04    | 17            | 169       | Ribosome    | Genetic<br>Information<br>Processing;<br>Translation |

**Enrichment of GO/Kegg categories; over represented in module120**

| Category      | Adj pval | Num in subset | Num total | Term     | Ontology                                             |
|---------------|----------|---------------|-----------|----------|------------------------------------------------------|
| path:lma03010 | 0.0072   | 7             | 169       | Ribosome | Genetic<br>Information<br>Processing;<br>Translation |

**Enrichment of GO/Kegg categories; over represented in module132**

| Category   | Adj pval | Num in subset | Num total | Term                                  | Ontology |
|------------|----------|---------------|-----------|---------------------------------------|----------|
| GO:0044267 | 0.0309   | 3             | 12        | cellular protein<br>metabolic process | BP       |

**Enrichment of GO/Kegg categories; over represented in module143**

| Category   | Adj pval | Num in subset | Num total | Term                                                                            | Ontology |
|------------|----------|---------------|-----------|---------------------------------------------------------------------------------|----------|
| GO:0016593 | 0.0495   | 2             | 2         | Cdc73/Paf1 complex                                                              | CC       |
| GO:0032968 | 0.0495   | 2             | 2         | positive regulation of transcription elongation from RNA polymerase II promoter | BP       |

**Enrichment of GO/Kegg categories; over represented in module 148**

| Category      | Adj pval | Num in subset | Num total | Term                               | Ontology                                    |
|---------------|----------|---------------|-----------|------------------------------------|---------------------------------------------|
| GO:0003735    | 0        | 19            | 180       | structural constituent of ribosome | MF                                          |
| GO:0005622    | 0        | 19            | 377       | intracellular                      | CC                                          |
| GO:0005840    | 0        | 18            | 173       | ribosome                           | CC                                          |
| GO:0006412    | 0        | 19            | 224       | translation                        | BP                                          |
| path:lma03010 | 0        | 21            | 169       | Ribosome                           | Genetic Information Processing; Translation |

**Enrichment of GO/Kegg categories; over represented in module 149**

| Category   | Adj pval | Num in subset | Num total | Term           | Ontology |
|------------|----------|---------------|-----------|----------------|----------|
| GO:0030286 | 0.0054   | 7             | 15        | dynein complex | CC       |

**Enrichment of GO/Kegg categories; over represented in module 150**

| Category      | Adj pval | Num in subset | Num total | Term                               | Ontology                                    |
|---------------|----------|---------------|-----------|------------------------------------|---------------------------------------------|
| GO:0003735    | 0        | 16            | 180       | structural constituent of ribosome | MF                                          |
| GO:0005622    | 0        | 16            | 377       | intracellular                      | CC                                          |
| GO:0005840    | 0        | 16            | 173       | ribosome                           | CC                                          |
| GO:0006412    | 0        | 15            | 224       | translation                        | BP                                          |
| path:lma03010 | 0        | 16            | 169       | Ribosome                           | Genetic Information Processing; Translation |



**Enrichment of GO/Kegg categories; over represented in module 172**

| <b>Category</b> | <b>Adj pval</b> | <b>Num in subset</b> | <b>Num total</b> | <b>Term</b>                          | <b>Ontology</b> |
|-----------------|-----------------|----------------------|------------------|--------------------------------------|-----------------|
| GO:0004197      | 0.0250          | 2                    | 7                | cysteine-type endopeptidase activity | MF              |
| GO:0004519      | 0.0009          | 3                    | 15               | endonuclease activity                | MF              |
| GO:0006308      | 0.0004          | 3                    | 9                | DNA catabolic process                | BP              |

**Enrichment of GO/Kegg categories; over represented in module 207**

| <b>Category</b> | <b>Adj pval</b> | <b>Num in subset</b> | <b>Num total</b> | <b>Term</b>                        | <b>Ontology</b>                             |
|-----------------|-----------------|----------------------|------------------|------------------------------------|---------------------------------------------|
| GO:0003735      | 0.0000          | 8                    | 166              | structural constituent of ribosome | MF                                          |
| GO:0005622      | 0.0299          | 6                    | 299              | intracellular                      | CC                                          |
| GO:0005840      | 0.0000          | 9                    | 157              | ribosome                           | CC                                          |
| GO:0006412      | 0.0000          | 8                    | 171              | translation                        | BP                                          |
| GO:0032465      | 0.0073          | 2                    | 3                | regulation of cytokinesis          | BP                                          |
| path:lma03010   | 3e-04           | 8                    | 169              | Ribosome                           | Genetic Information Processing; Translation |
